# Supplementary material
Source: PubMed Central journal article supplement (PMC4235773)

# Supplementary Figure 4

**a**

```

CDK8 MDYDFKVKLSS ERERVEDLFEYEGCKVGRGTYGHVYKARRKDGKDDKDYALKQI ---- EGTGISMSACREIALRELKHPNVISLQKVFLSHADRVWLLFDYAEHDLWHI IKFHRRAS KANKKPVQLPRGMV 128
CDK19 MDYDFKAKLAA ERERVEDLFEYEGCKVGRGTYGHVYKARRKDGKDEKEYALKQI ---- EGTGISMSACREIALRELKHPNVIALQKVFLSHSDRVWLLFDYAEHDLWHI IKFHRRAS KANKKPMQLPRSMV 128
CDK3 MDMFQKVE ----- KIGEGTYGVVYKAKNRETG --QLVALKKRLDL EMEGVPSTAIRERISL KRELKHPNIVRLDQV -- HNERKLYLVEEFLSQDLKKYMDSTPGS ----- ELPHLI 104

CDK8 KSLLYQILDG IHYLHANWVLRDLKPAIILVMGEGPERGRVKIADMGFARLFNSPLKPLADLDPVVVTFWYRAPELLGARHYTKAIDIWAIGCIFAELLTSEPIFHCRQEDIKTSNPFHHDQLDRIFNVMG 260
CDK19 KSLLYQILDG IHYLHANWVLRDLKPAIILVMGEGPERGRVKIADMGFARLFNSPLKPLADLDPVVVTFWYRAPELLGARHYTKAIDIWAIGCIFAELLTSEPIFHCRQEDIKTSNPFHHDQLDRIFNVMG 260
CDK3 KSYLFQLQGVSFCHSHRVIHRDLKPNLII ---- NELGAIKLAFLARAGVPLRITYTH --- EAVLWYRAPELLGSKFYTAVDIWSIGCIFAEMVTRKALFPGDSE ----- IDQLFRIFRMLG 220

CDK8 FPAADKDWEDIKMPPEHSTLMKDFRRNTYTNCSLIKYMEK --HKVKPDSKAFHLQKLLTMDPIKRITSEQAMQDPYFLE -DPLPTSDFVAGCQIPYPKREFLTEEEDDDKGDKNQOQ --- 375
CDK19 FPAADKDWEDIRKMPPEYPTLQKDFRRNTYTNCSLIKYMEK --HKVKPDSKAFHLQKLLTMDPIKRITSEQALQDPYFQE -DPLPTLDYFAGCQIPYPKREFLTEDDPEEKGDKNQOQQNQHQOQTAPPQQA 389
CDK3 TISEDTWPGVTQLPDYKGSFPAKWR ----- KGLLEIVPNLEFEGR --DLMQLLQYDPSQRLAKTALAHYFSSPEISPAAR ----- 295

CDK8 ----- OQGNHNTNGT ----- GHPGNQDSSHTDGPPLKVVVVVPTTSSGGLIMTSDYQRSNPHAAAYPNPGPSTSDPQSSSMGYSATSSQPPQY -- SHQTHRY 464
CDK19 AAPPQAPPQONSTQNGTAGGAGAGVGGTGAGLQHSQDSSLNQPVPKPKPLGSPGANSGGPVMPSDYQHSNRLNYQSSVQGSQSSQSTLGYSSSQSSSYHPSHQAHRY 502
CDK3 ----- QY --VLDREH 305
    
```

**b**

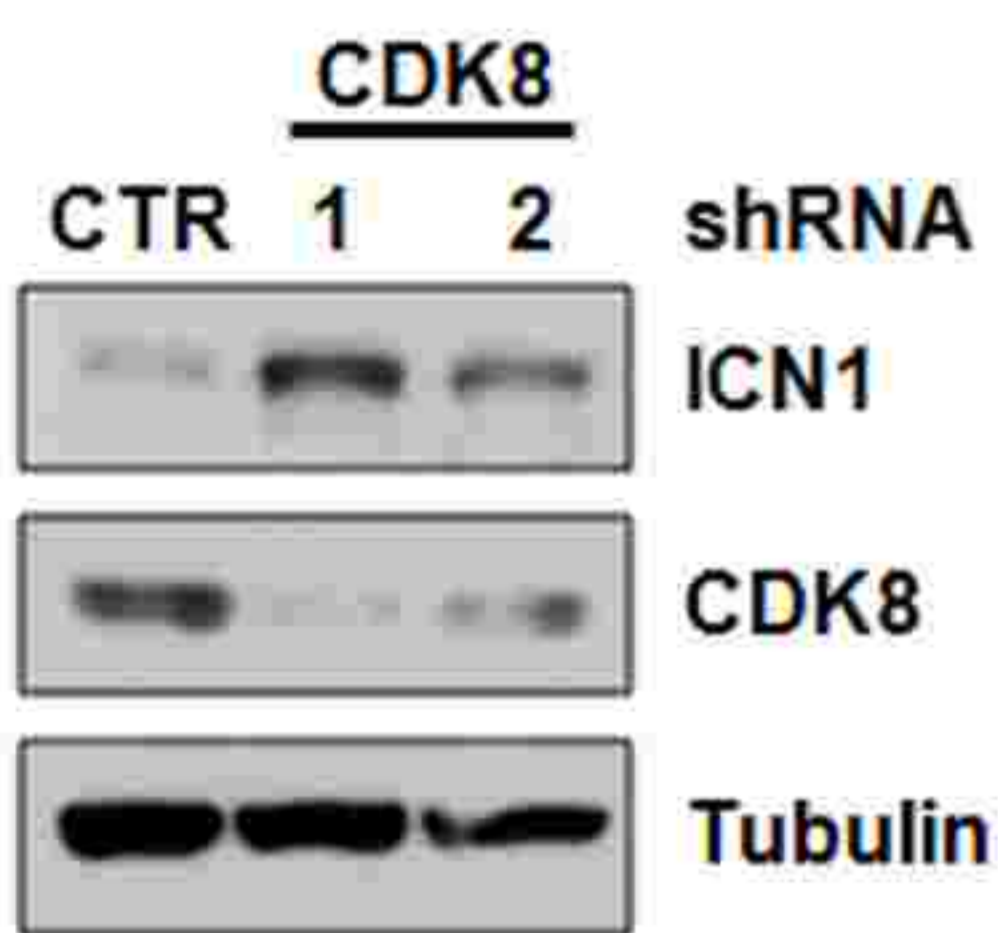

**c**

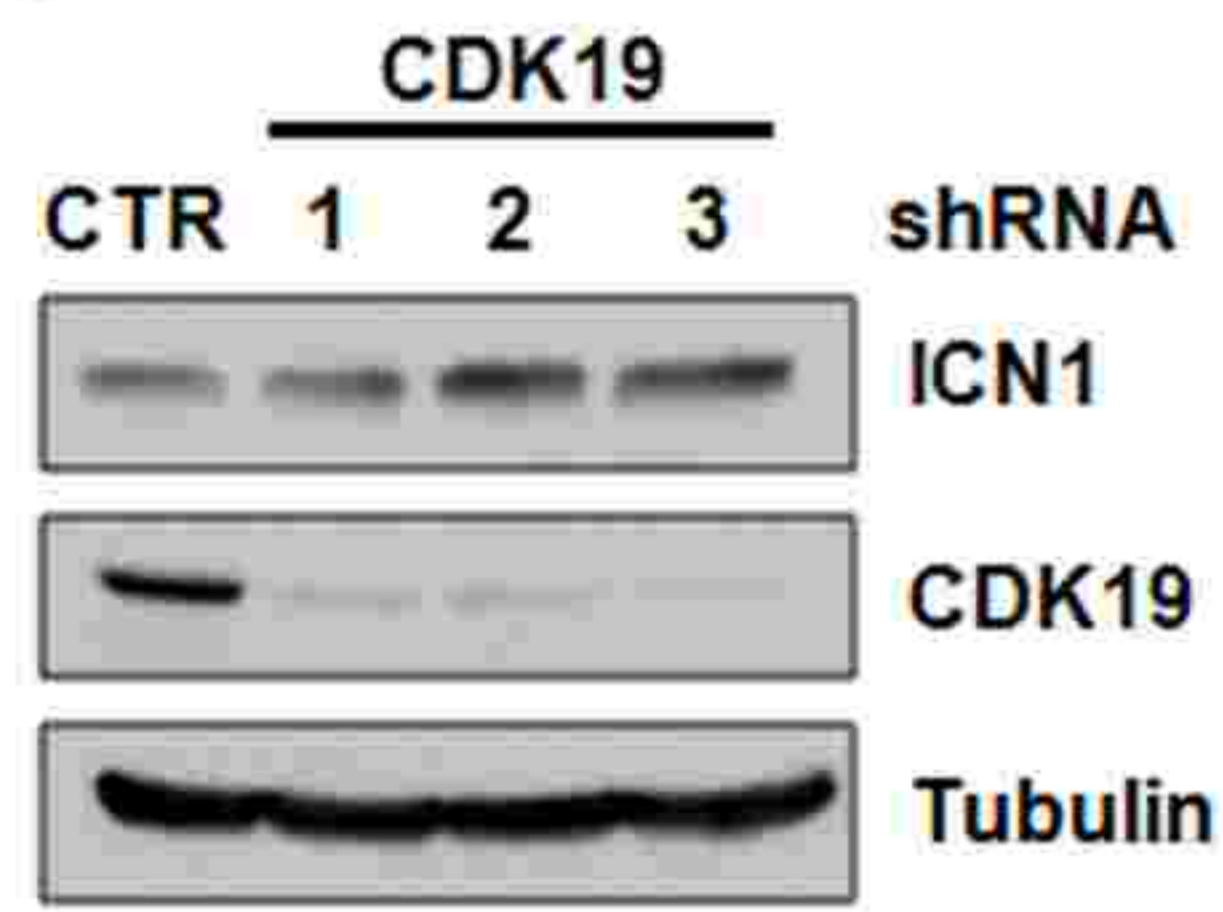

**d**

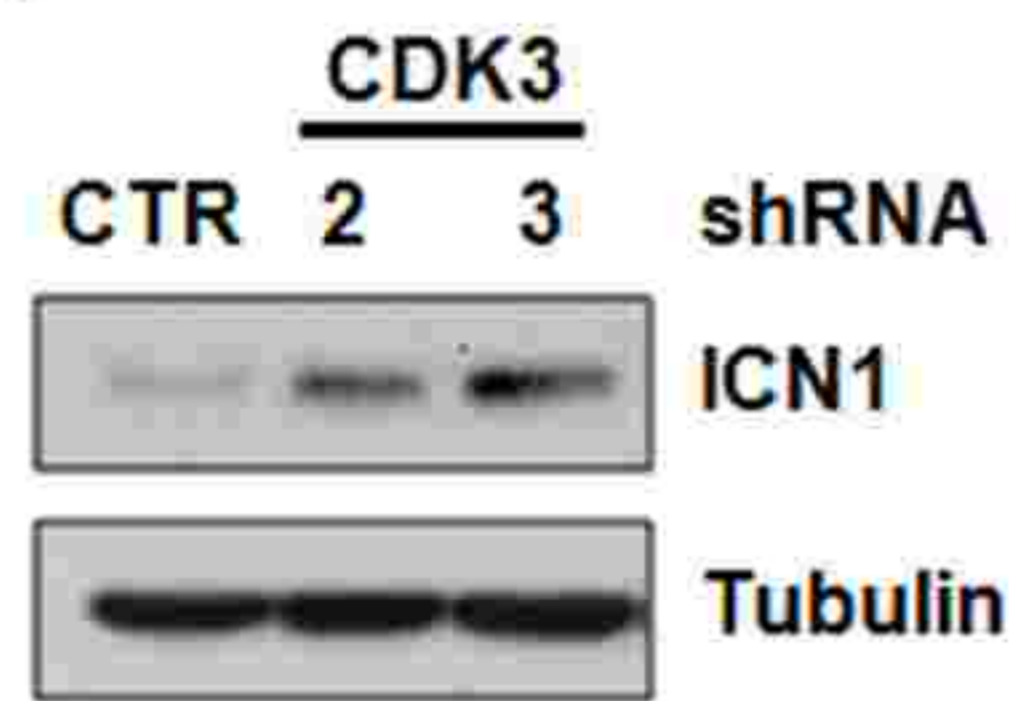

**e**

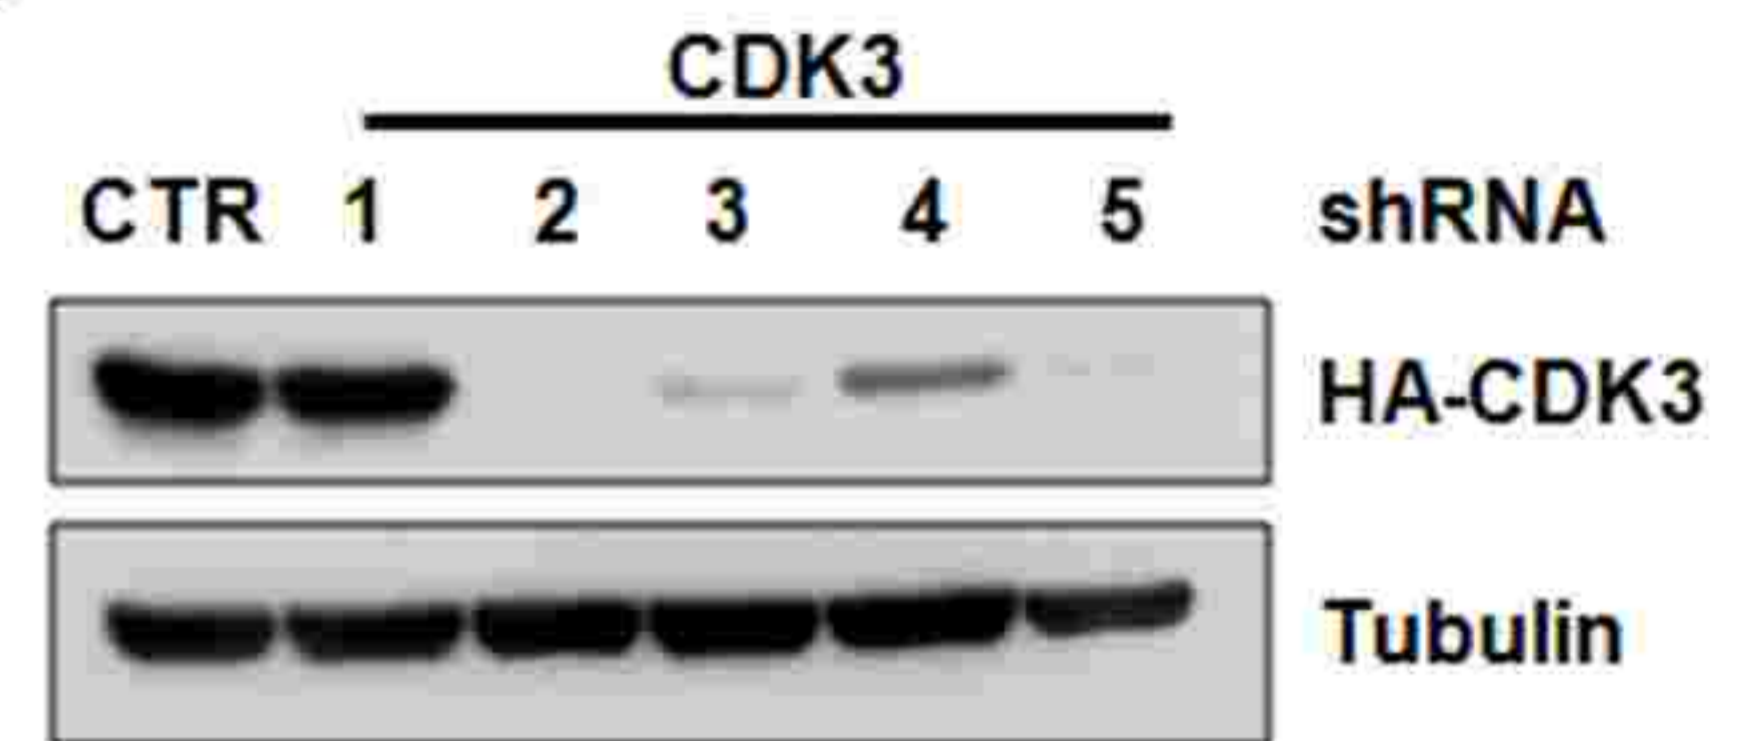

**f**

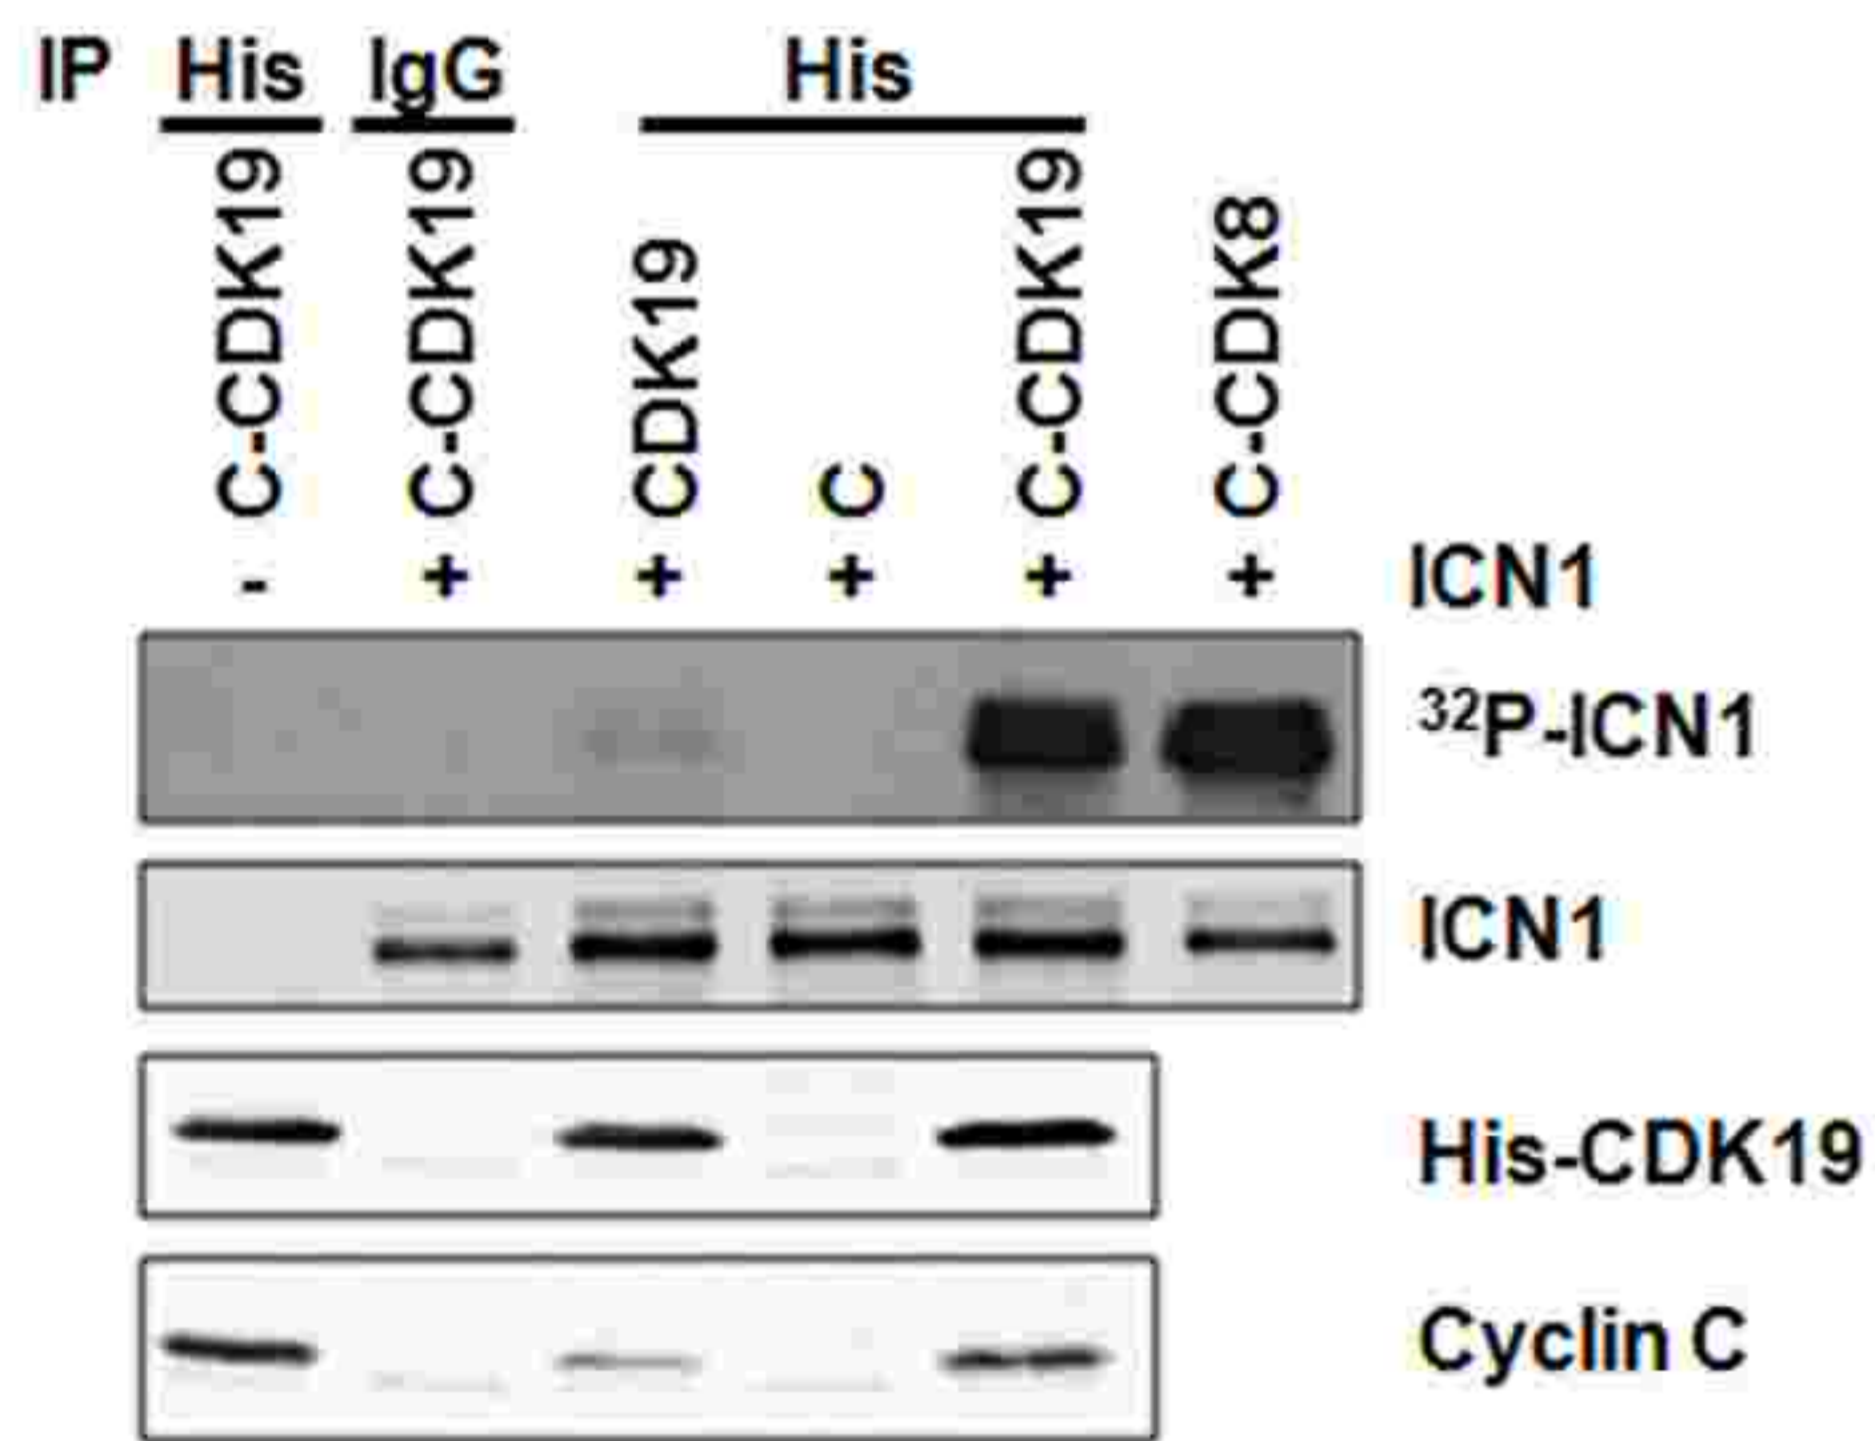

**g**

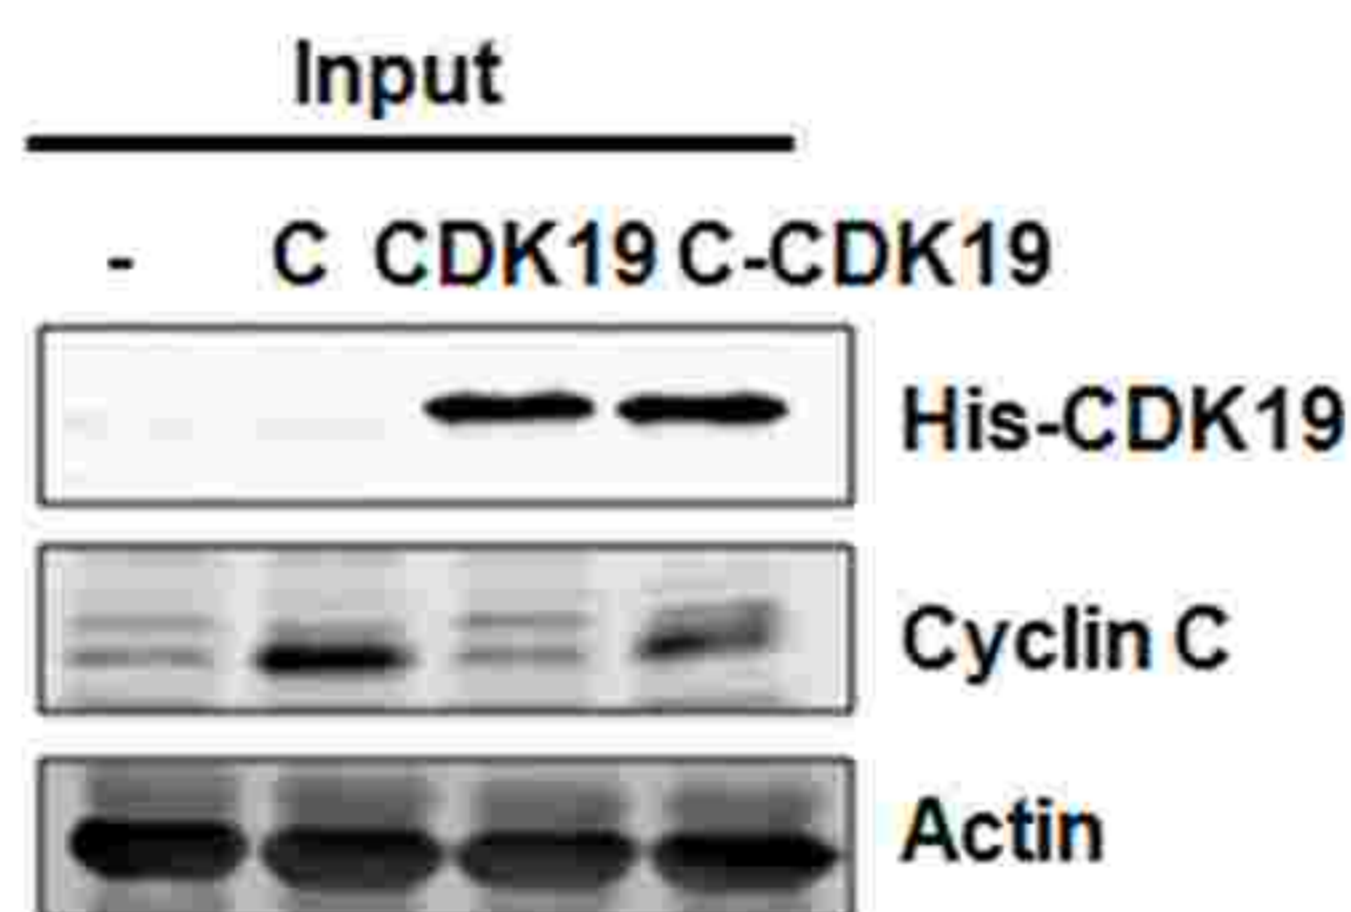

**h**

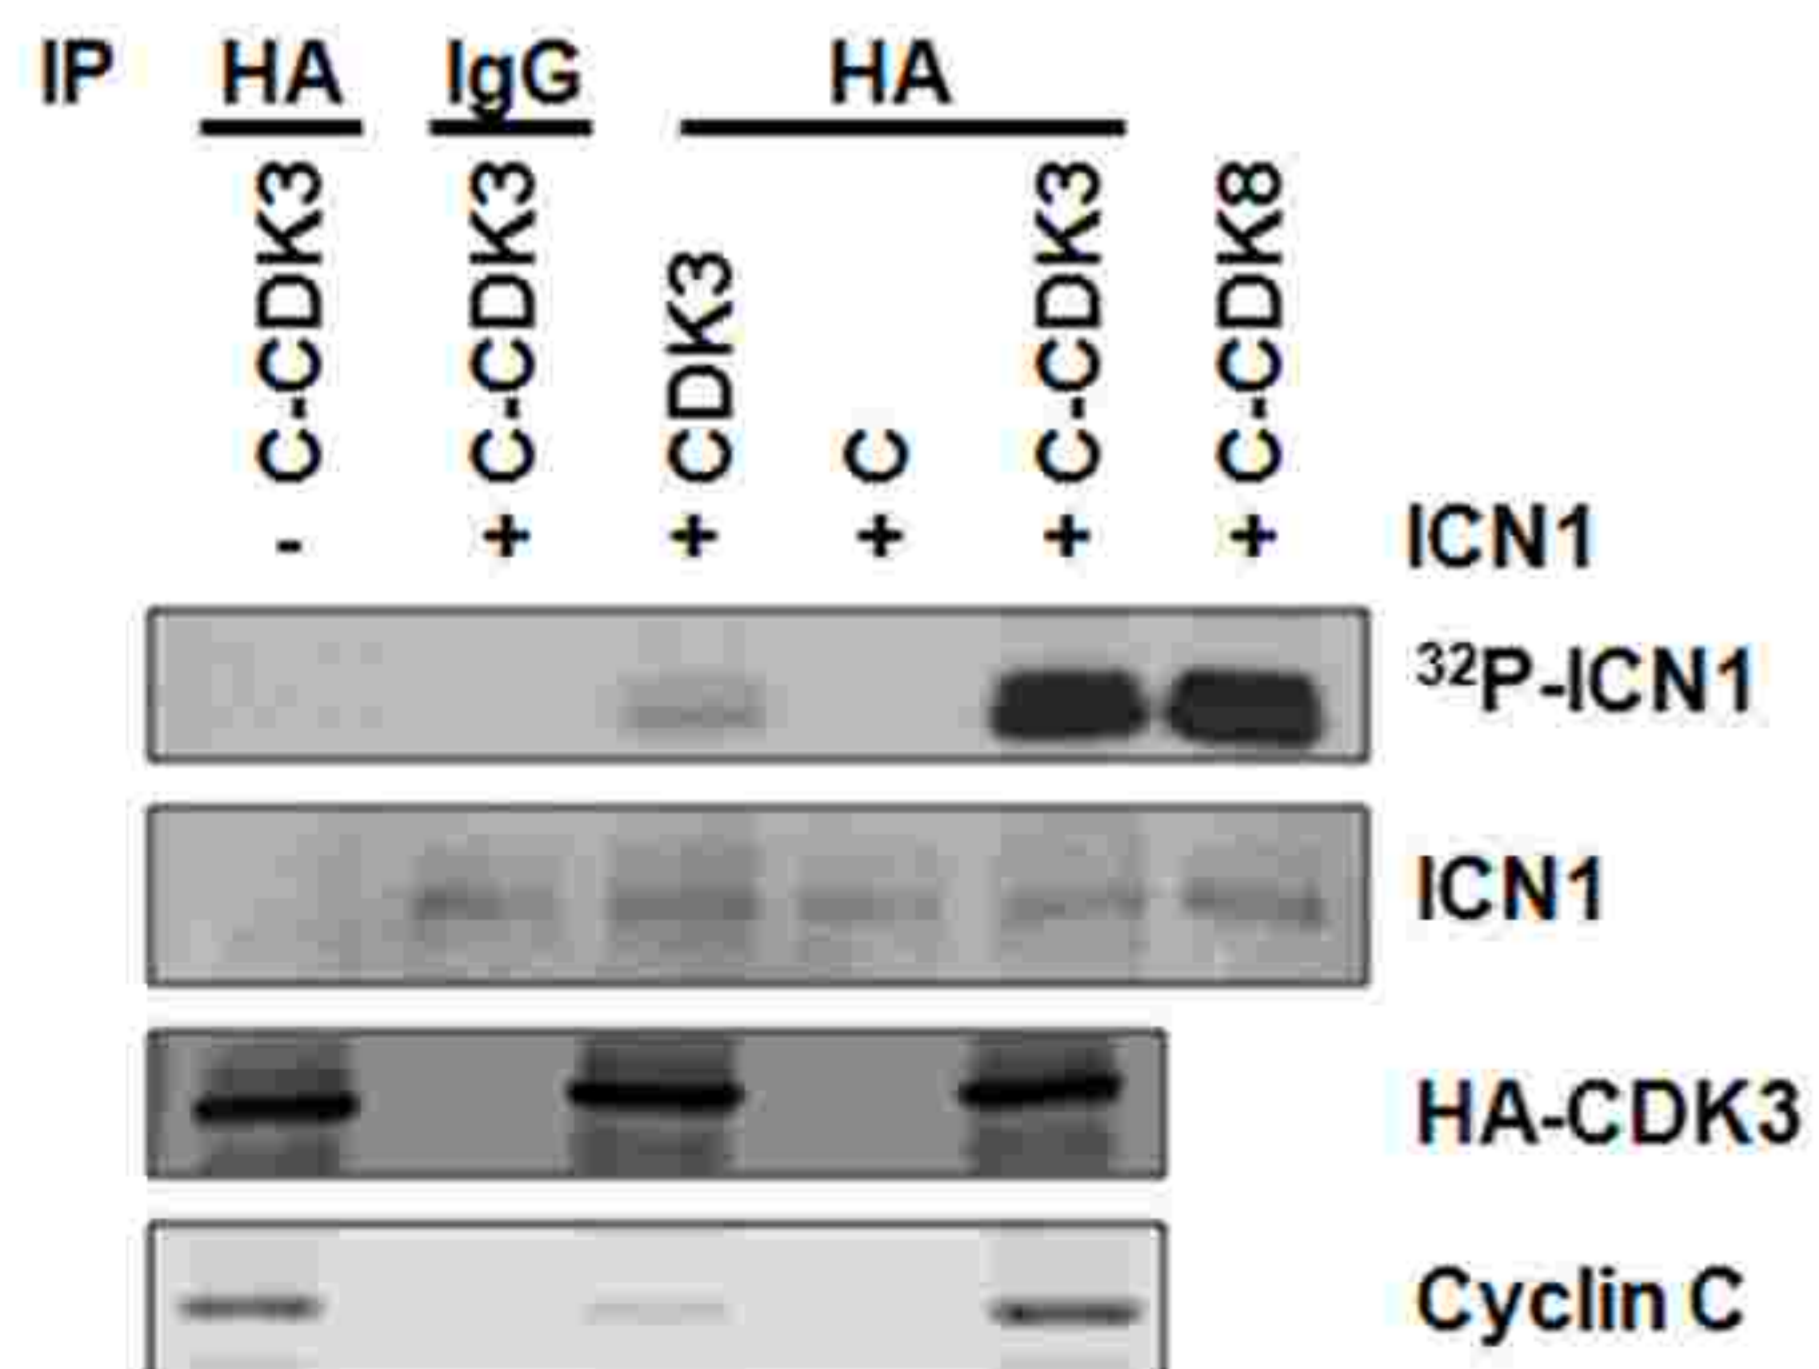

**i**

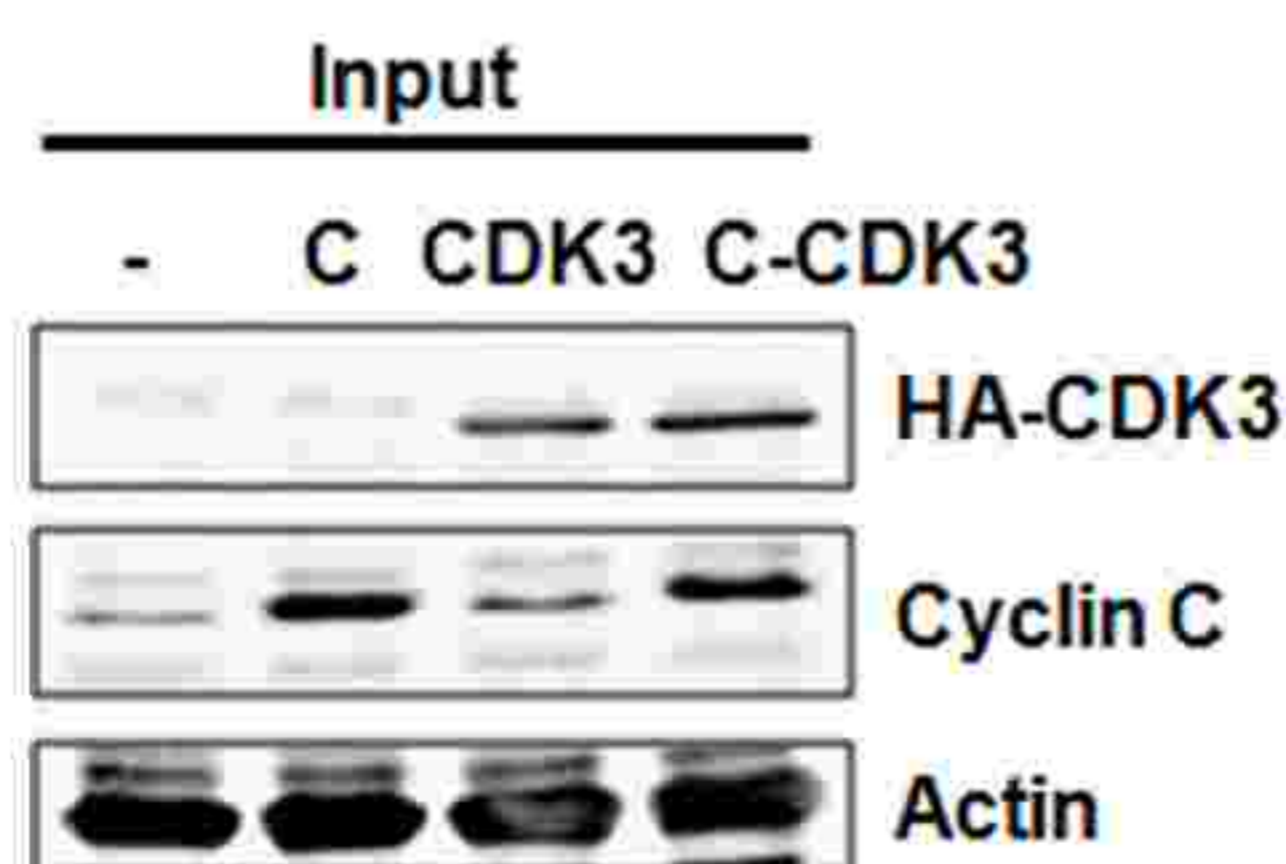

Supplement: NIHMS639903-supplement-Supplementary_Data_Fig_4.pdf [file NIHMS639903-supplement-Supplementary_Data_Fig_4.pdf]
