# Supplementary material
Source: PubMed Central journal article supplement (PMC4235773)

# Supplementary Figure 8

Figure 2a

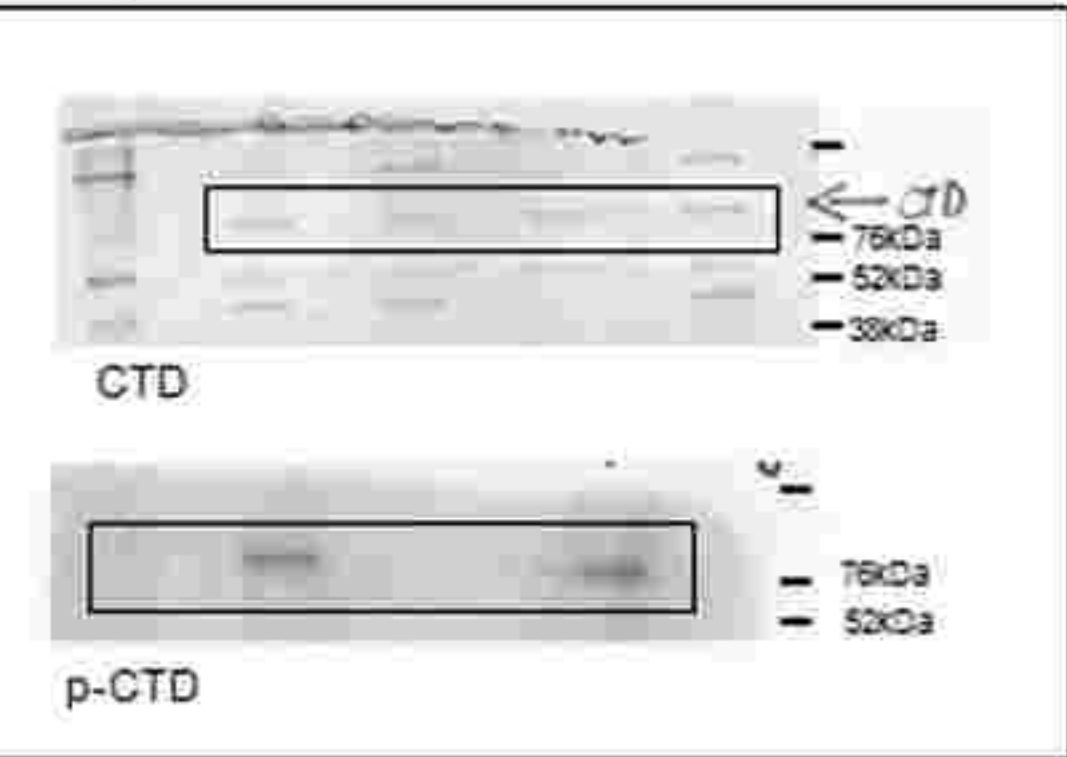

Figure 2b

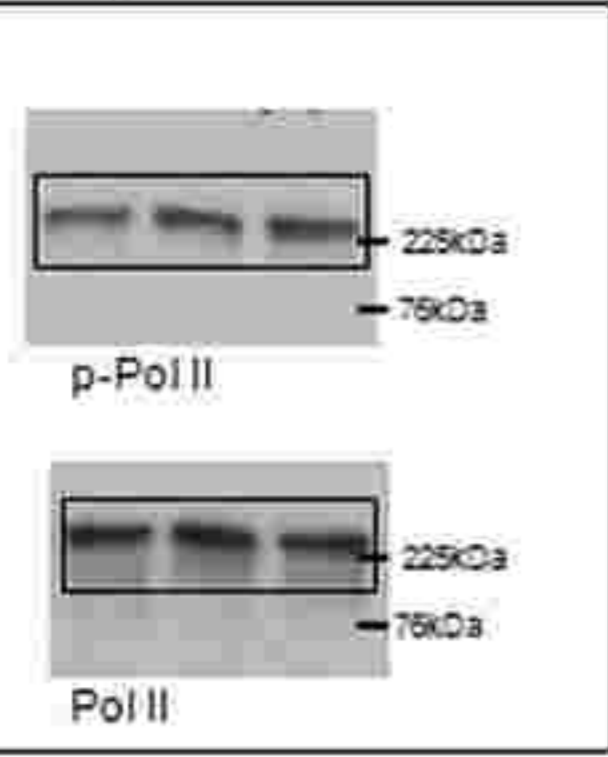

Figure 2c

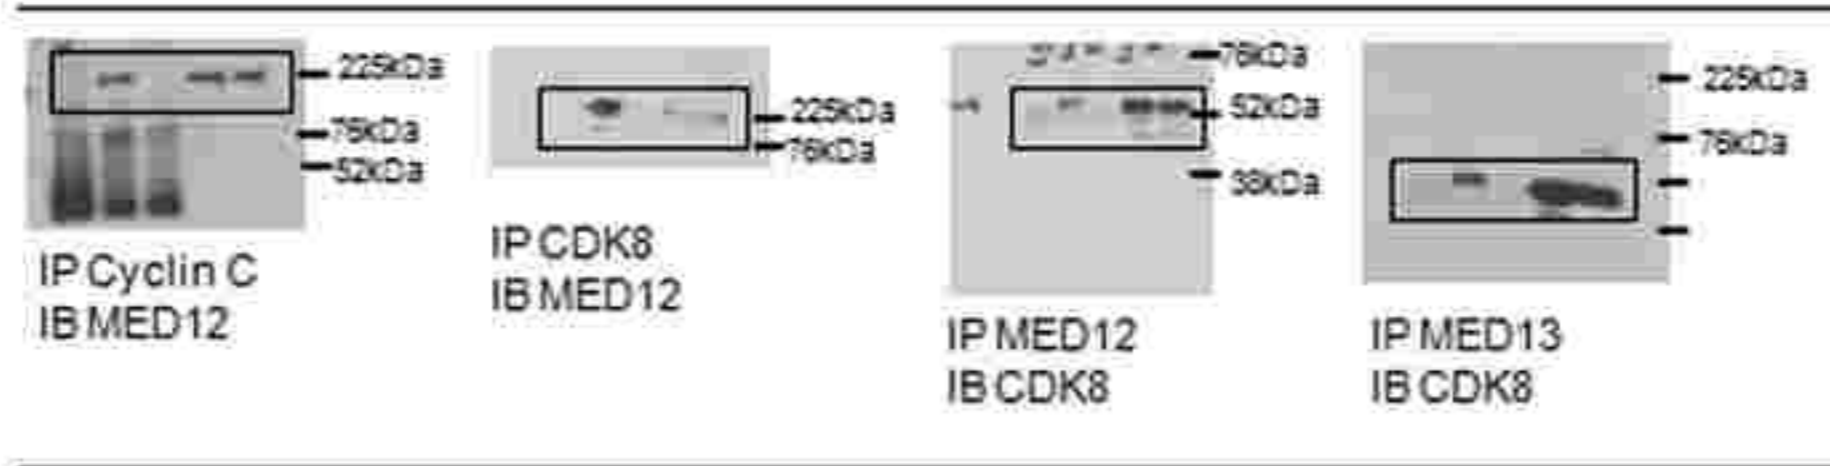

Figure 3d

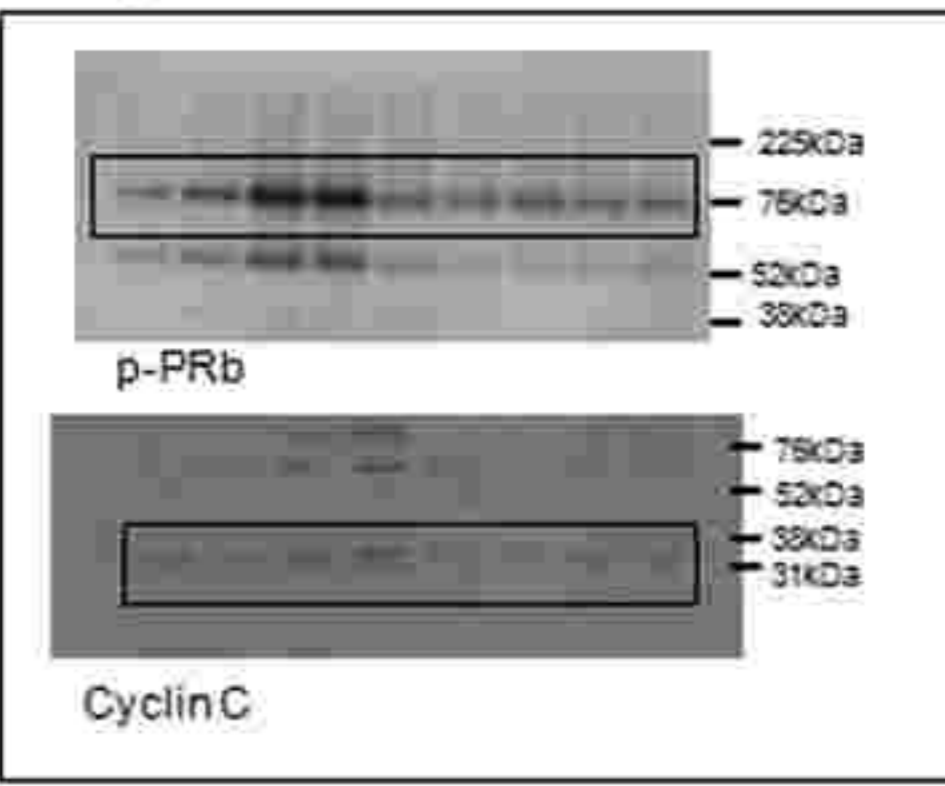

Figure 3f

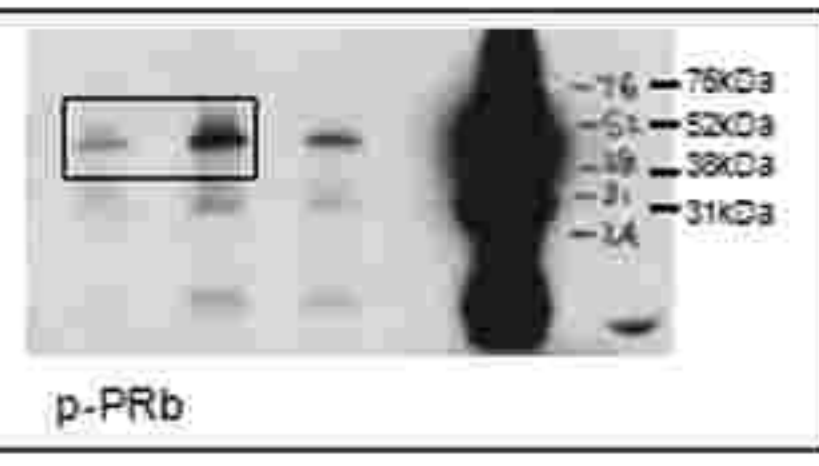

Figure 3e

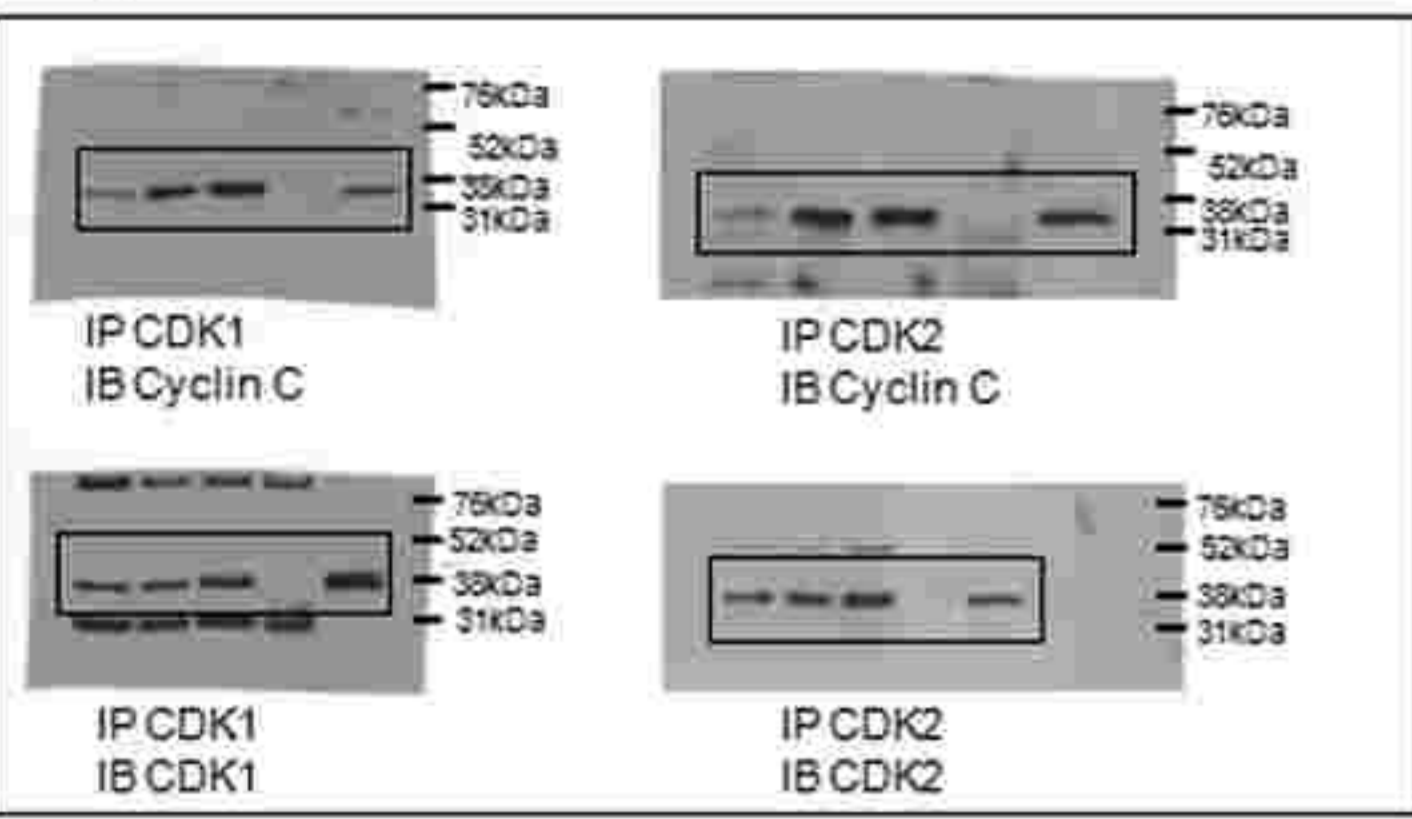

Figure 4c

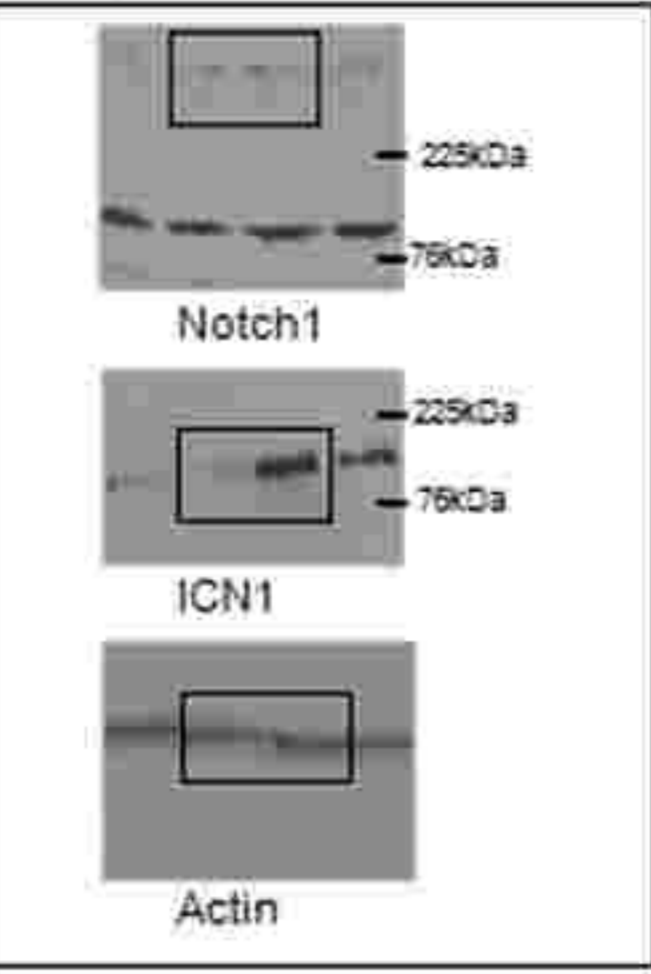

Figure 4e

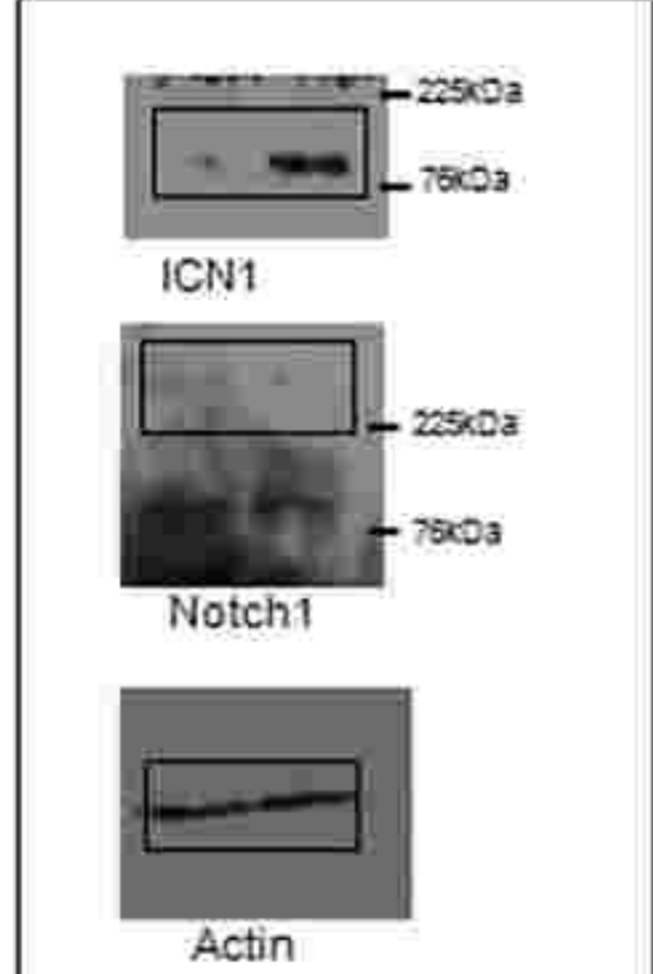

Figure 4g

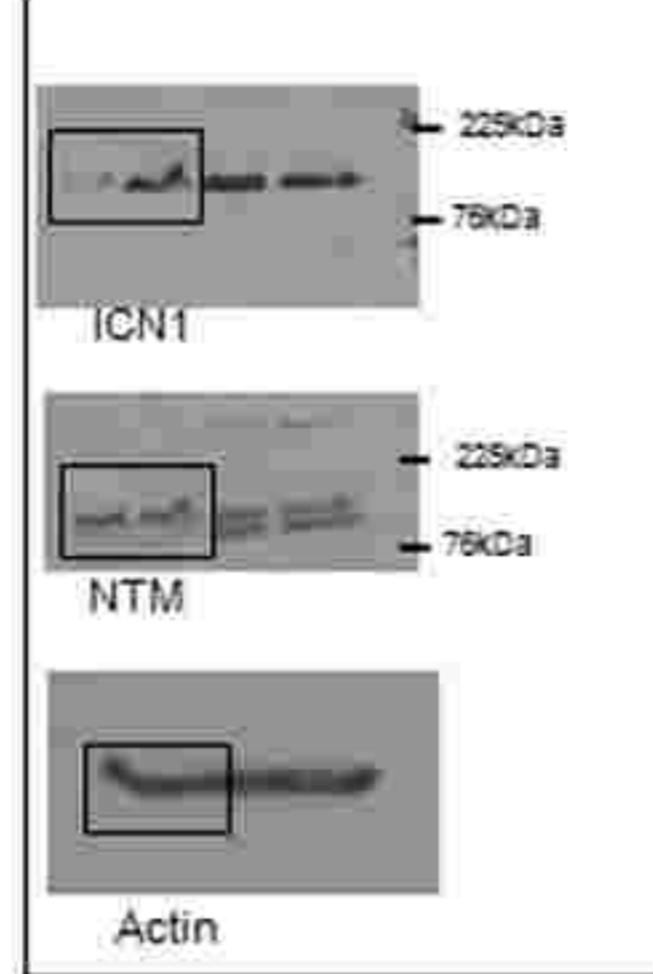

Figure 4h

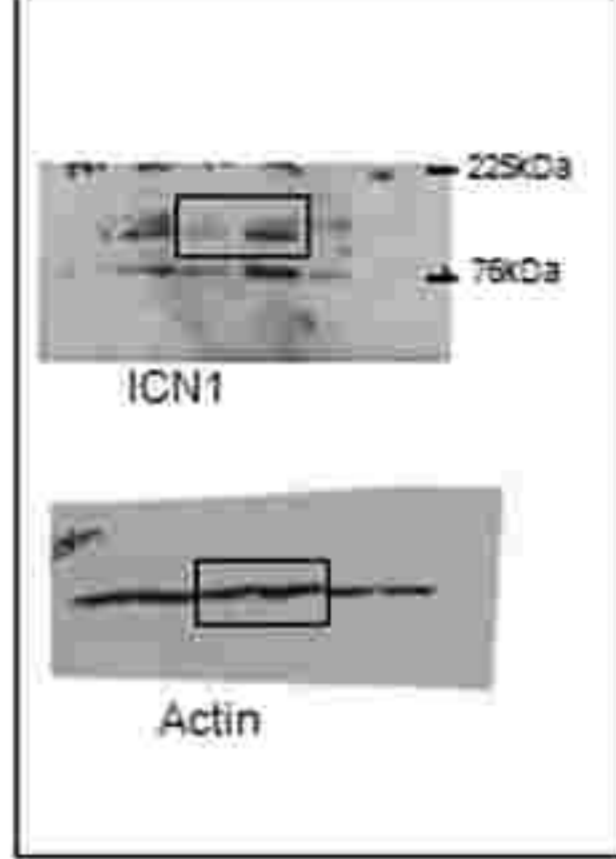

Figure 4i

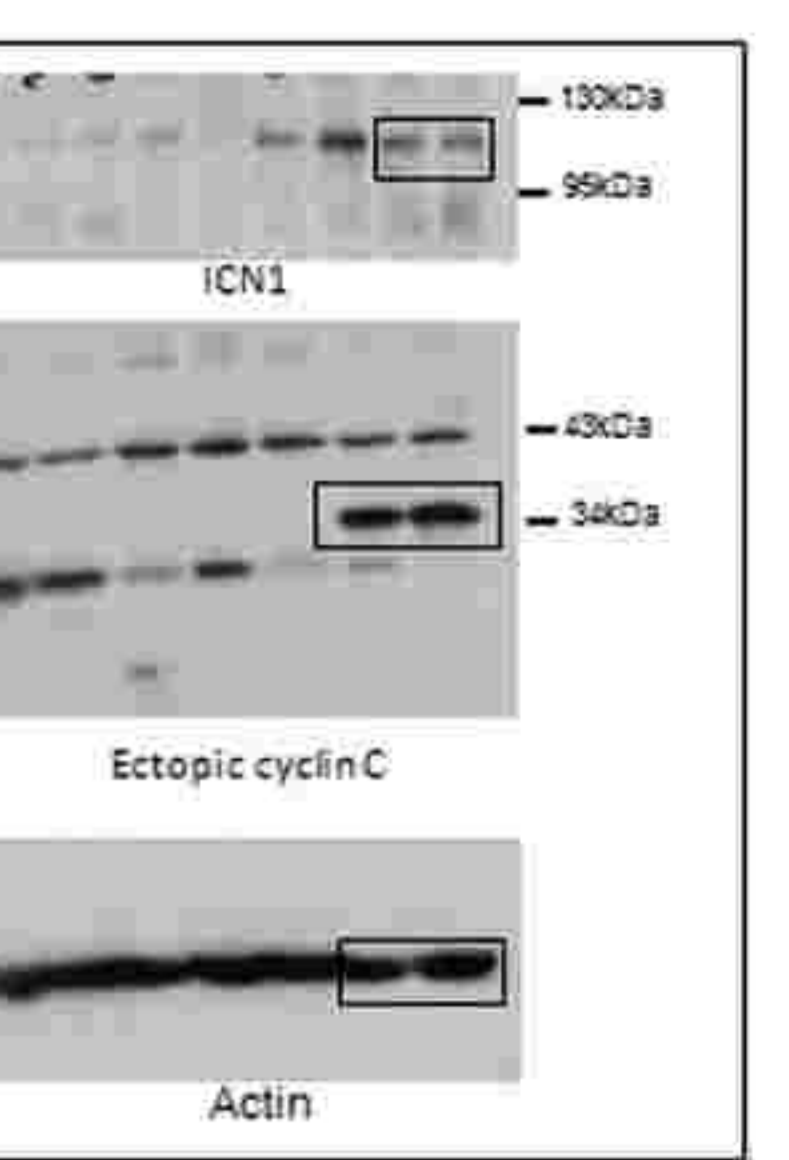

Figure 4j

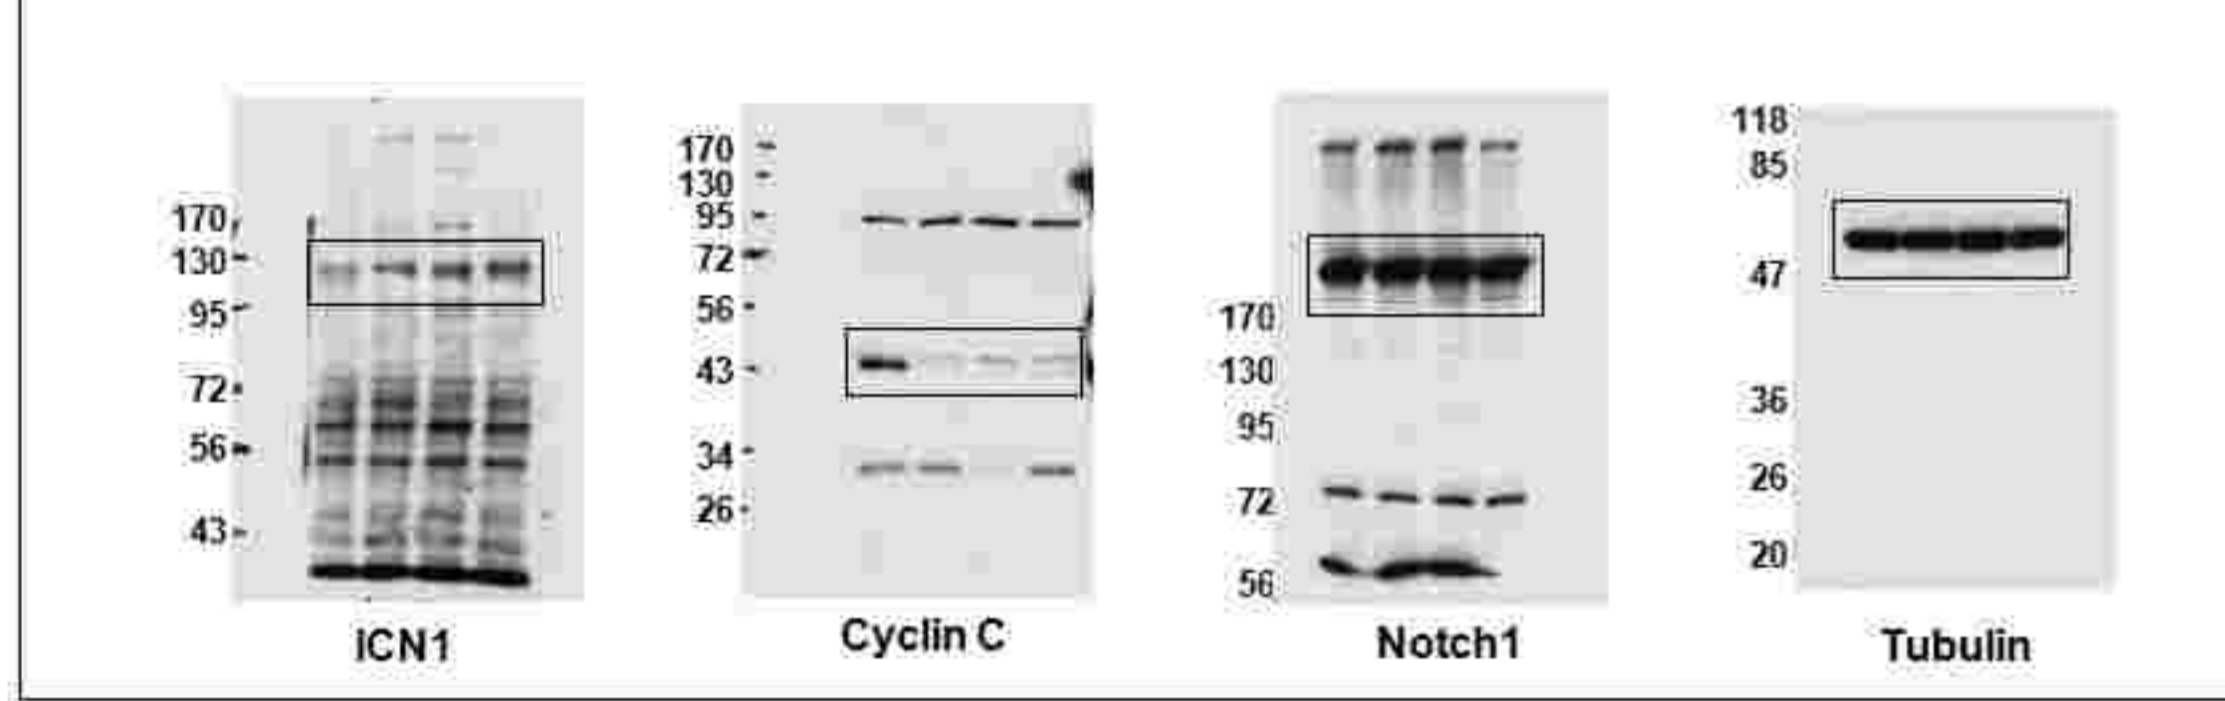

Figure 5a

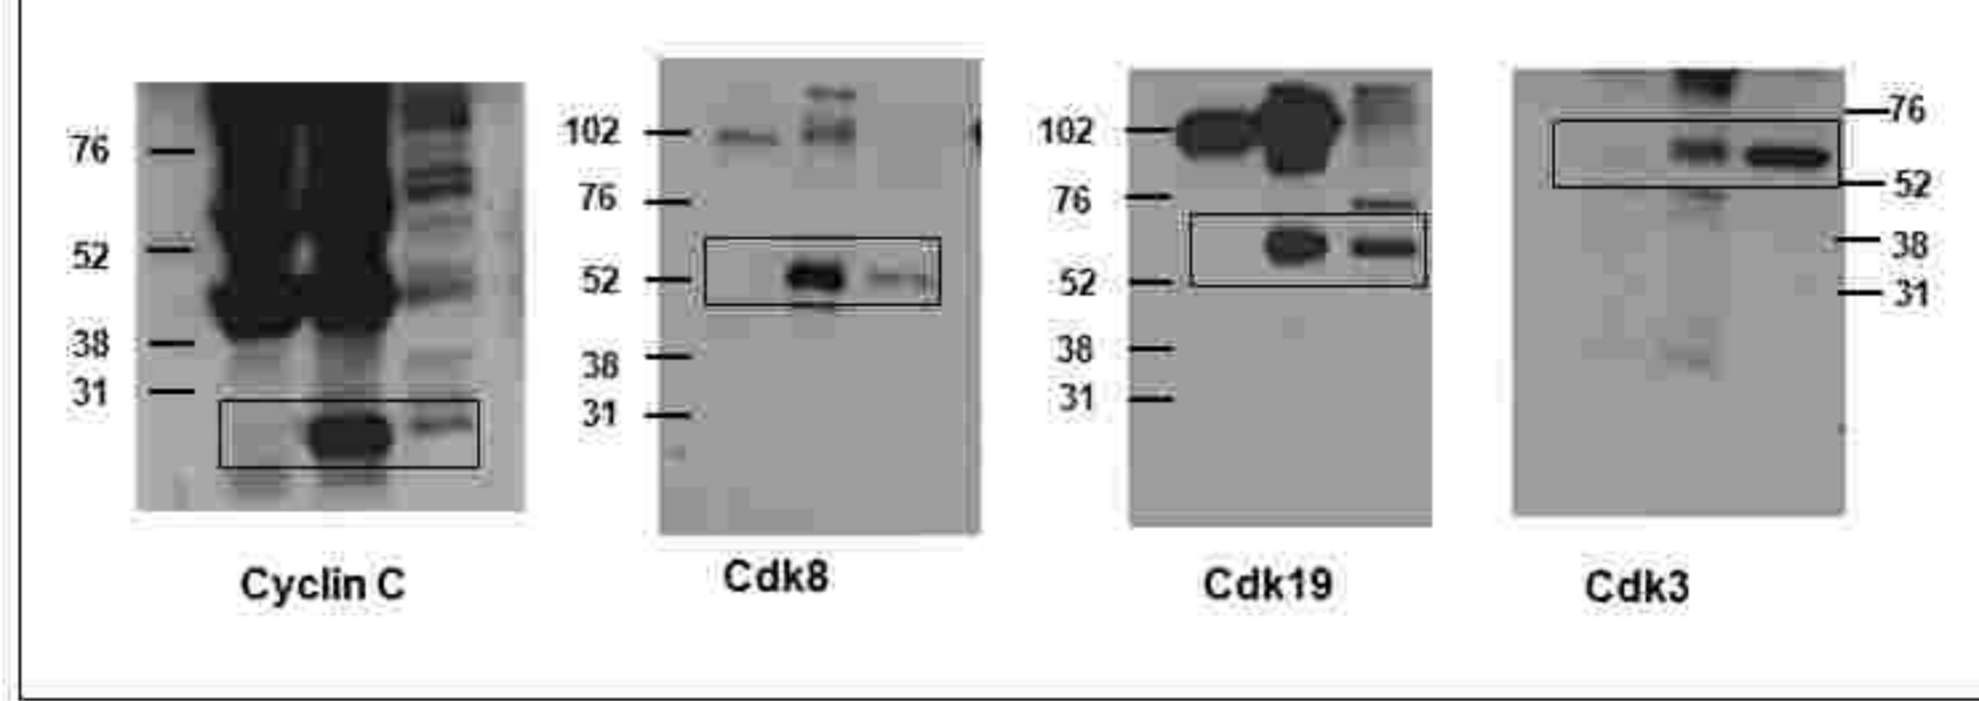

Figure 5b

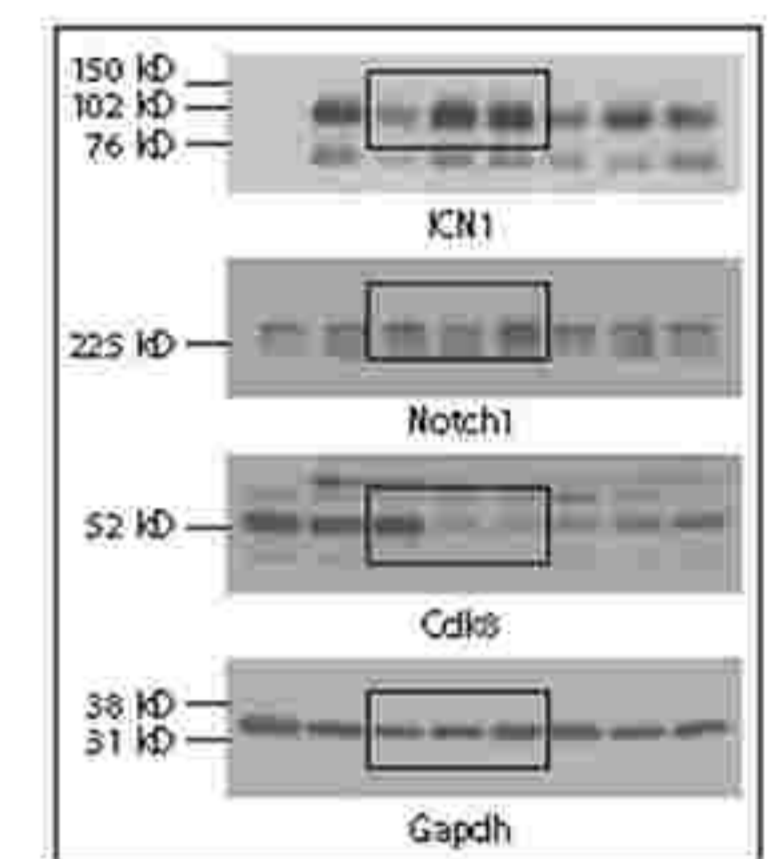

Figure 5c

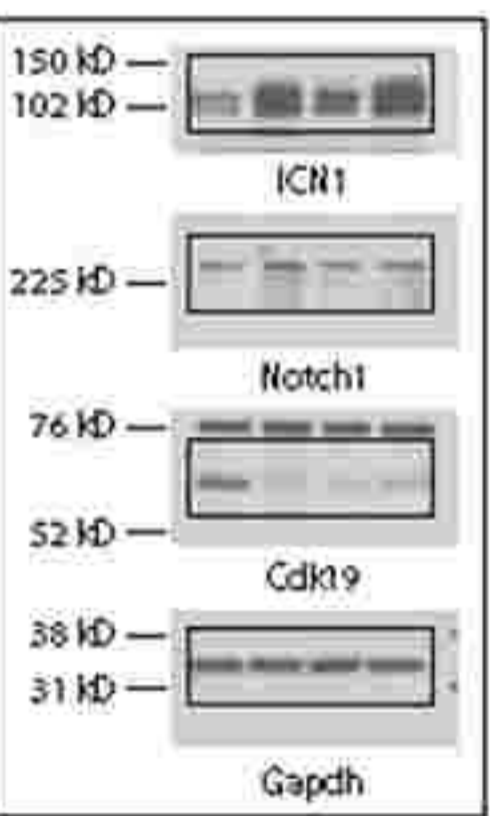

Figure 5d

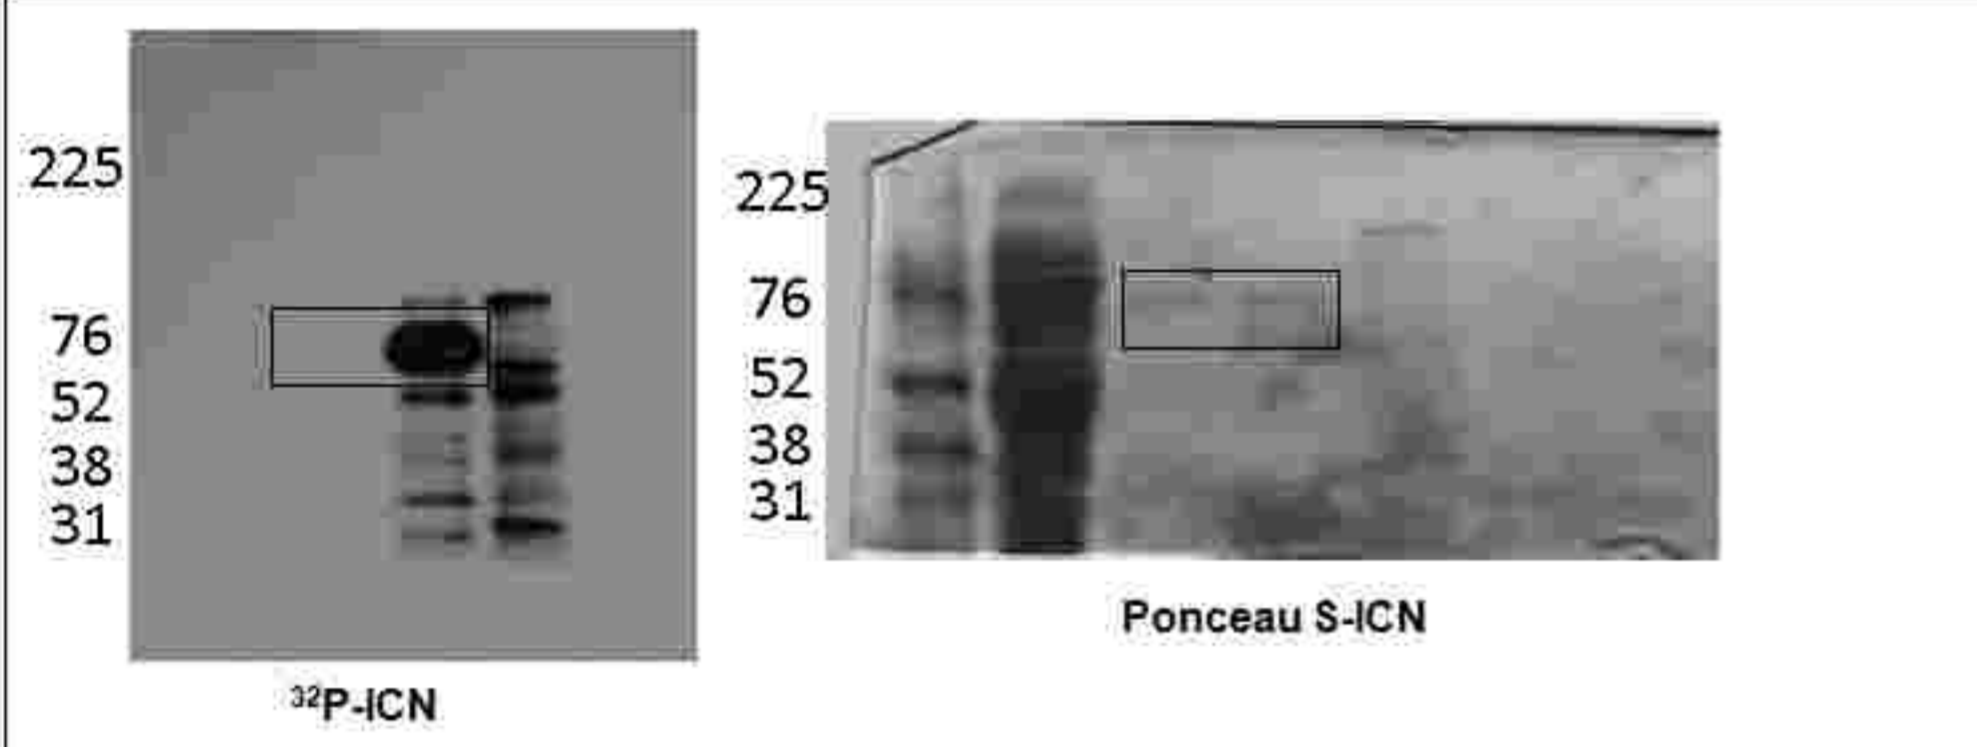

Figure 5e

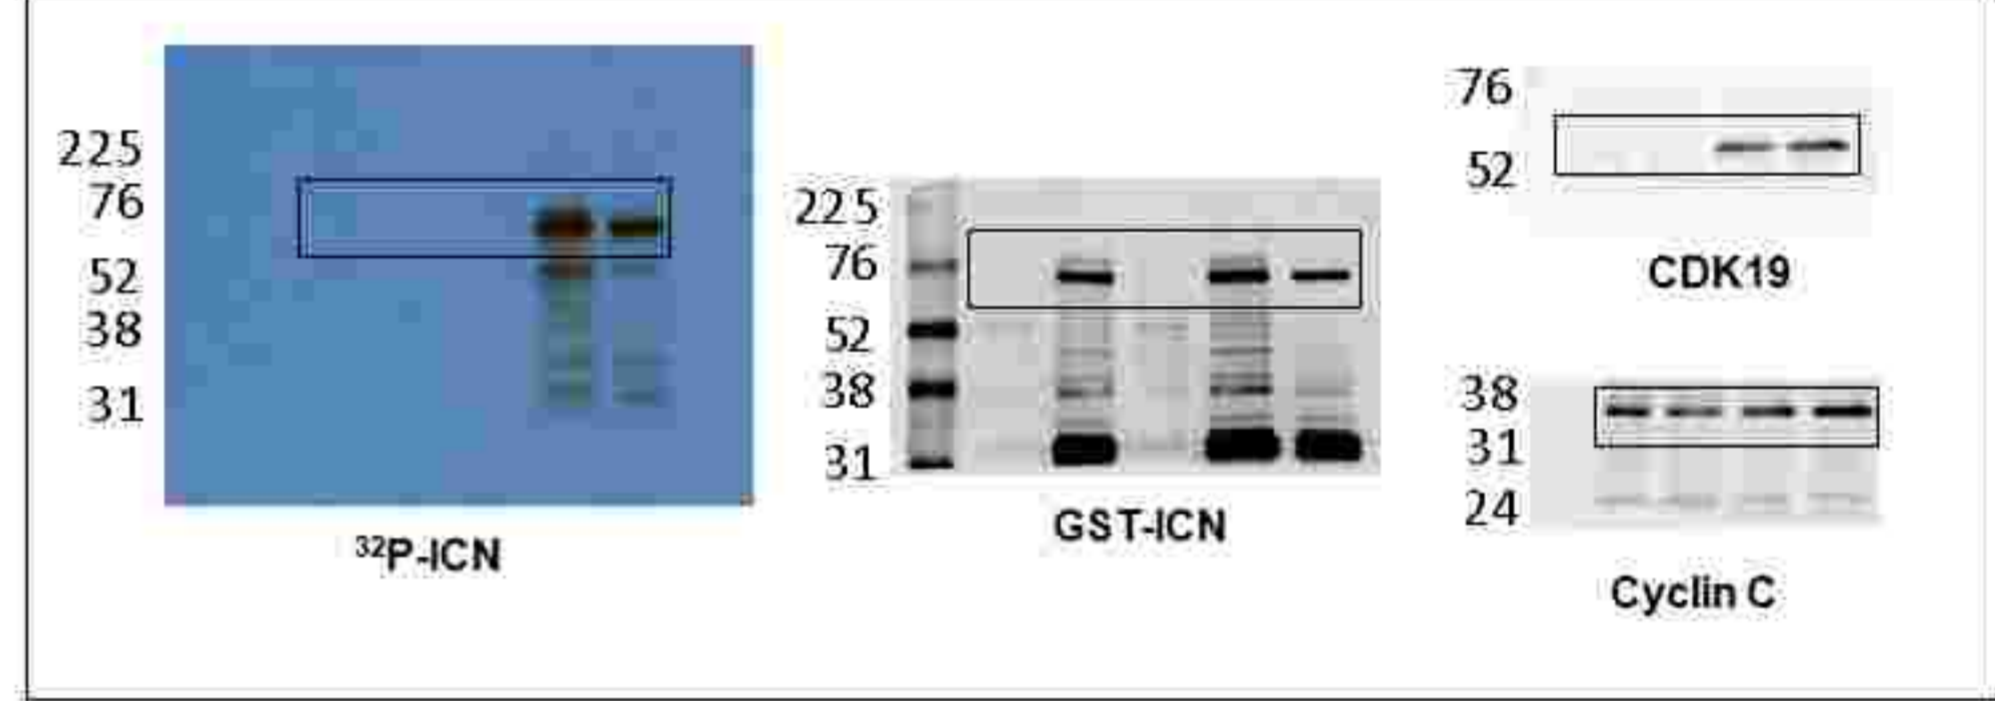

Figure 5f

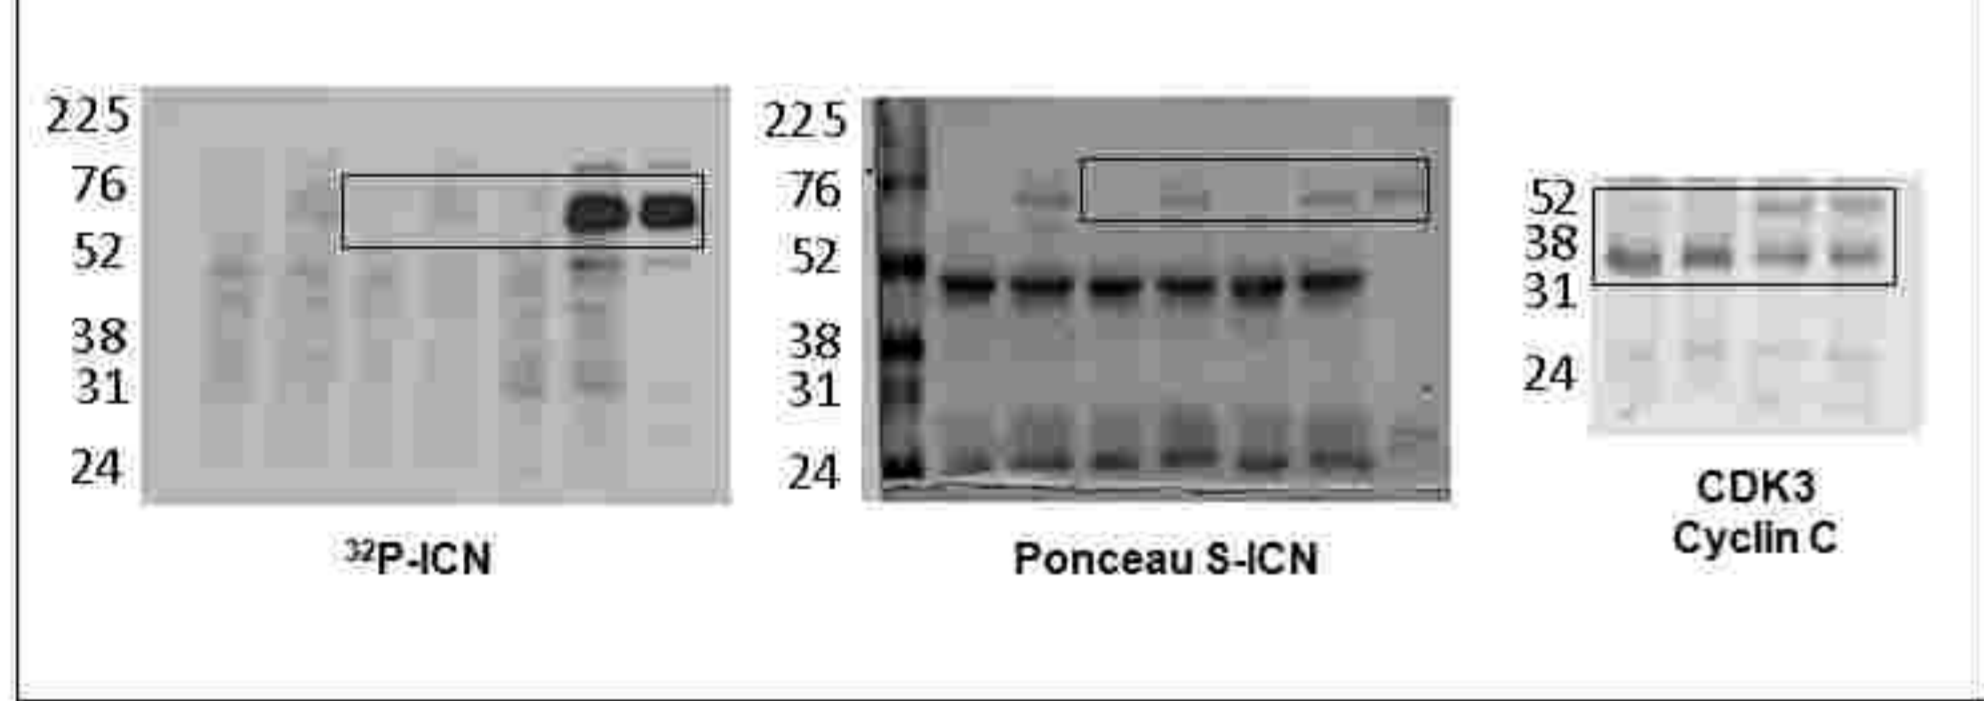

Figure 5h

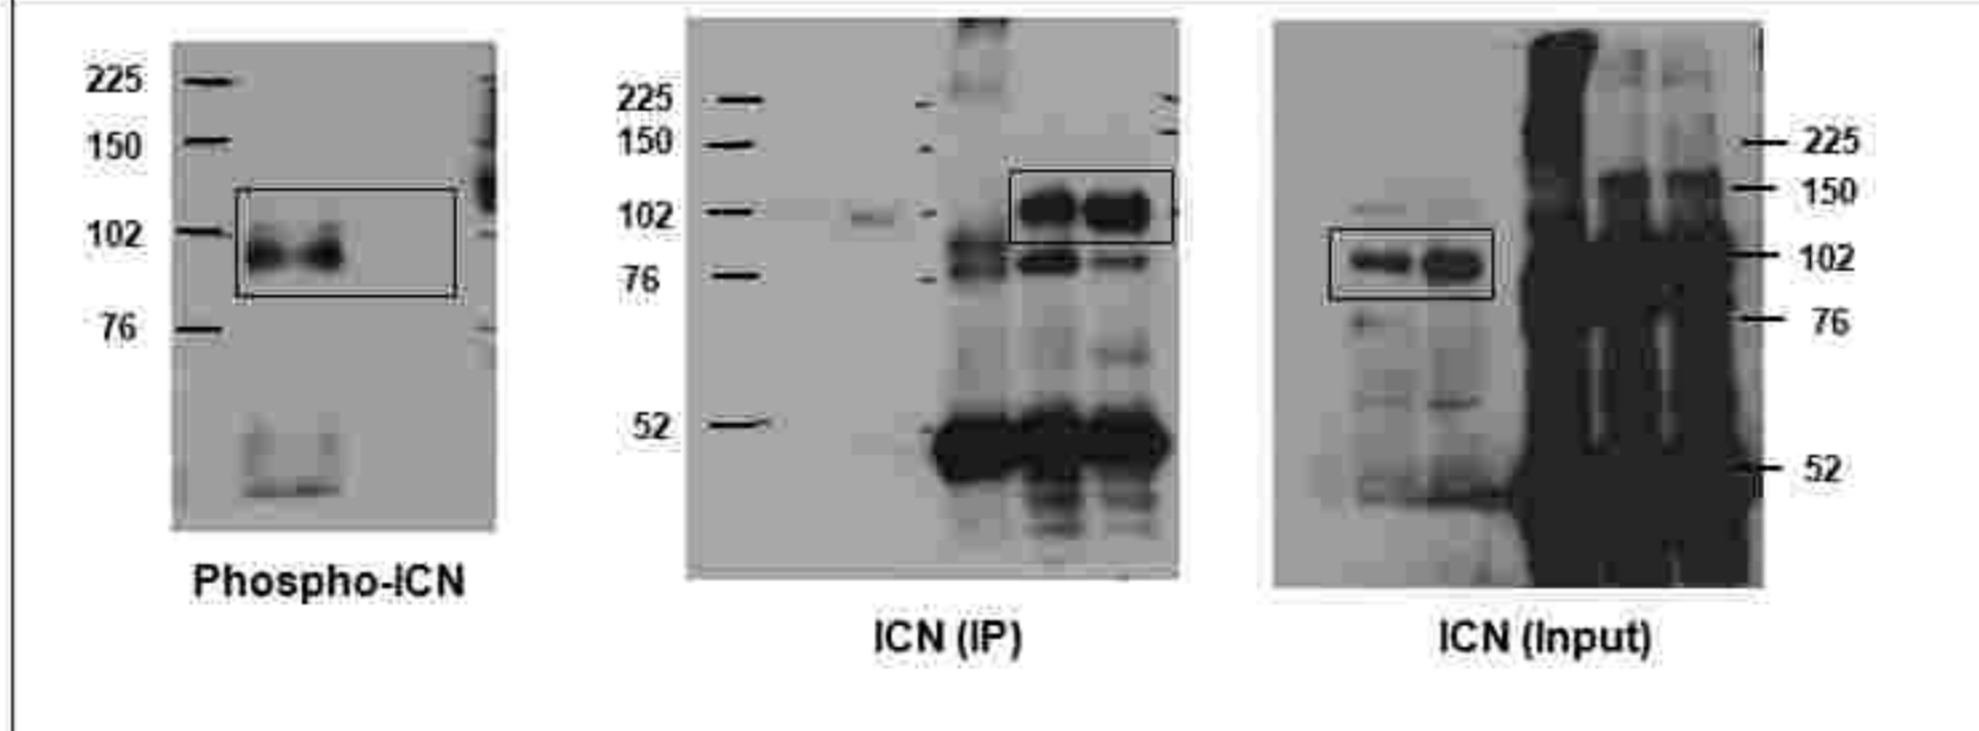

Figure 5i

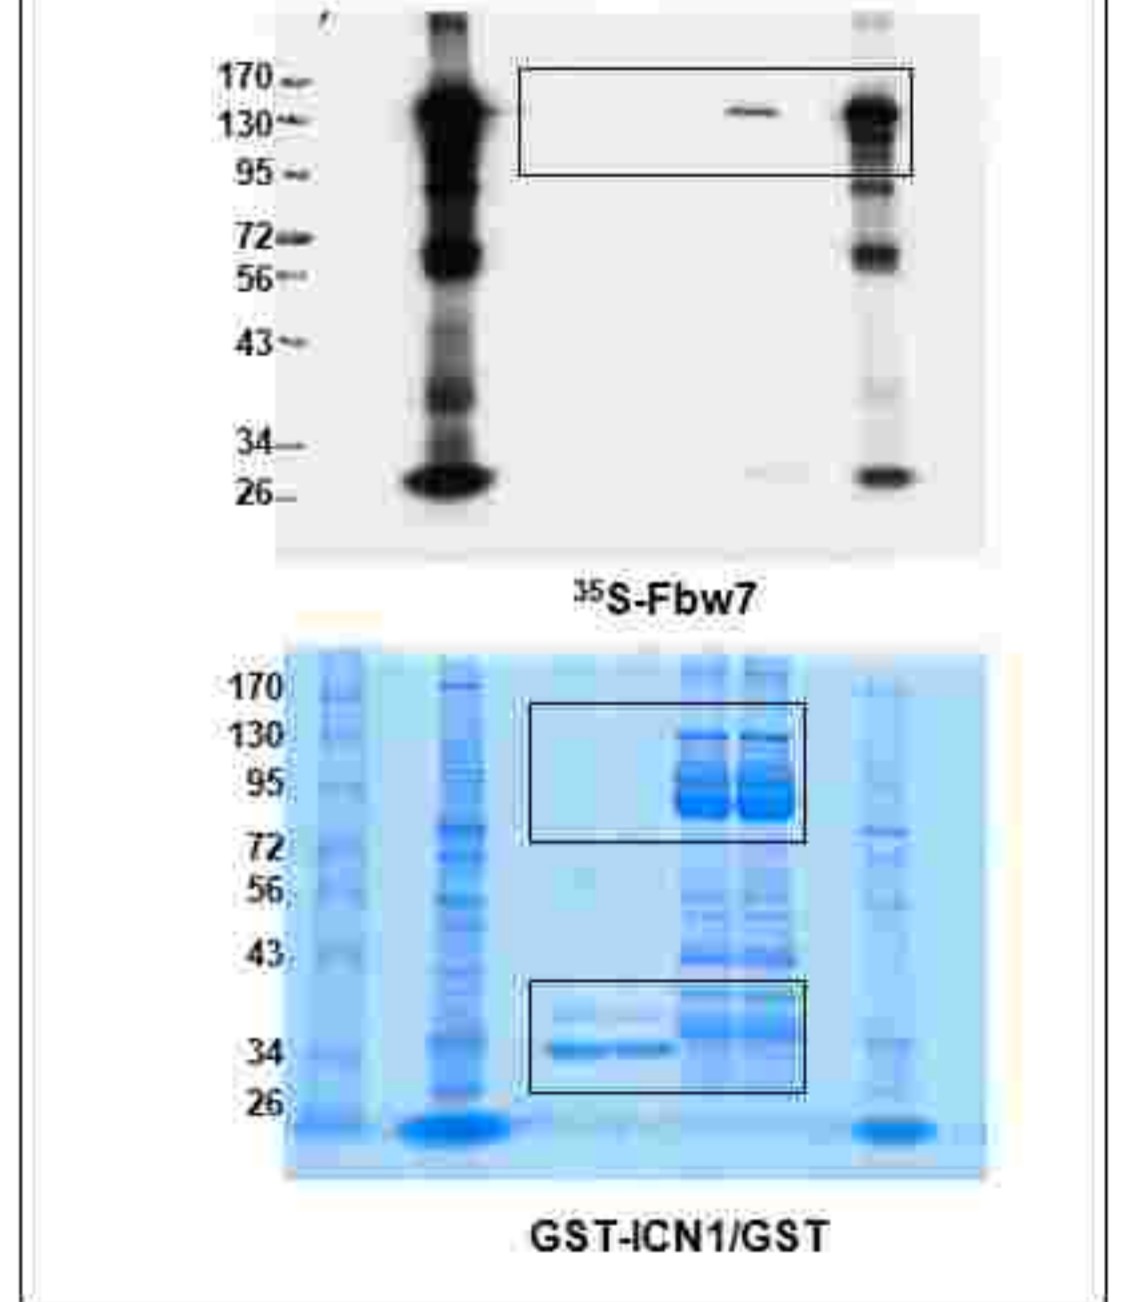

Figure 6d

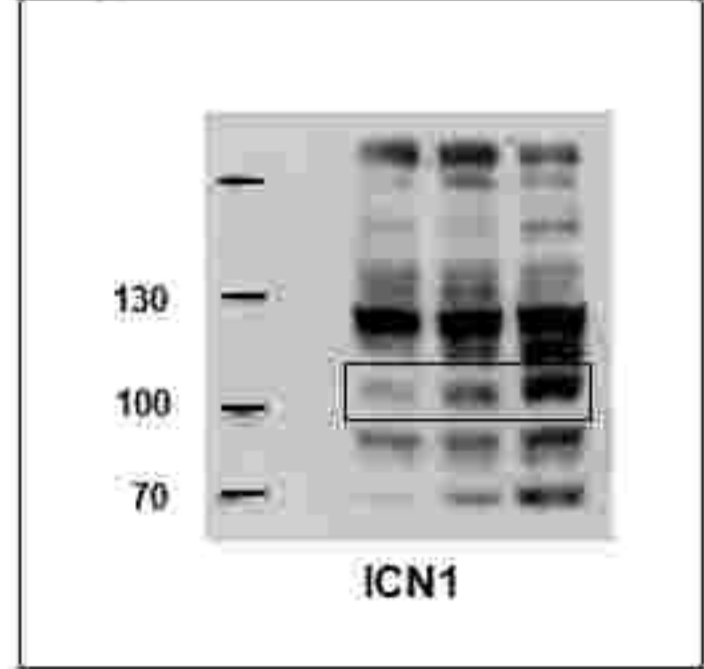

Figure 6e

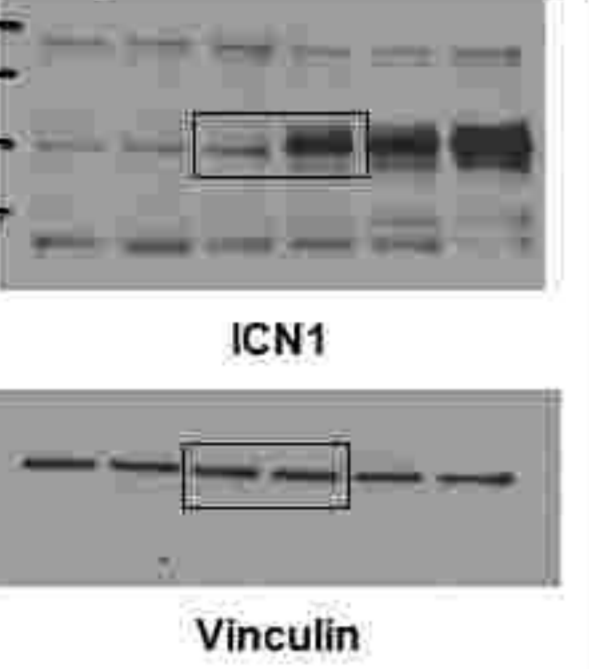

Figure 6f

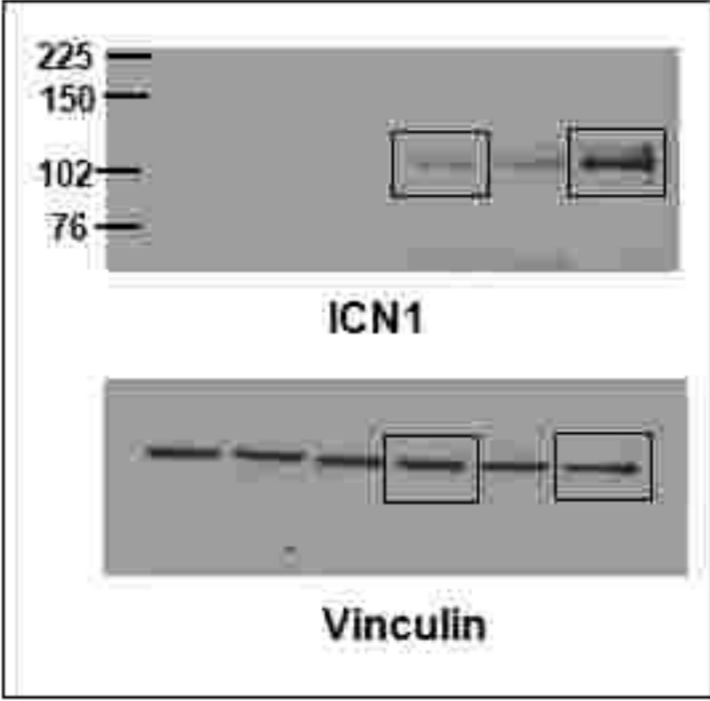

Figure 6g

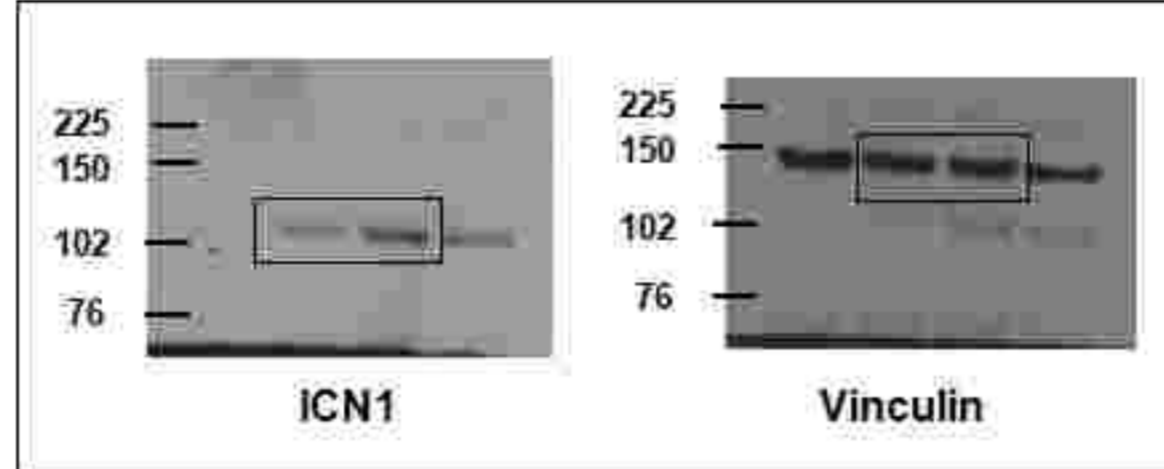

Figure 8c

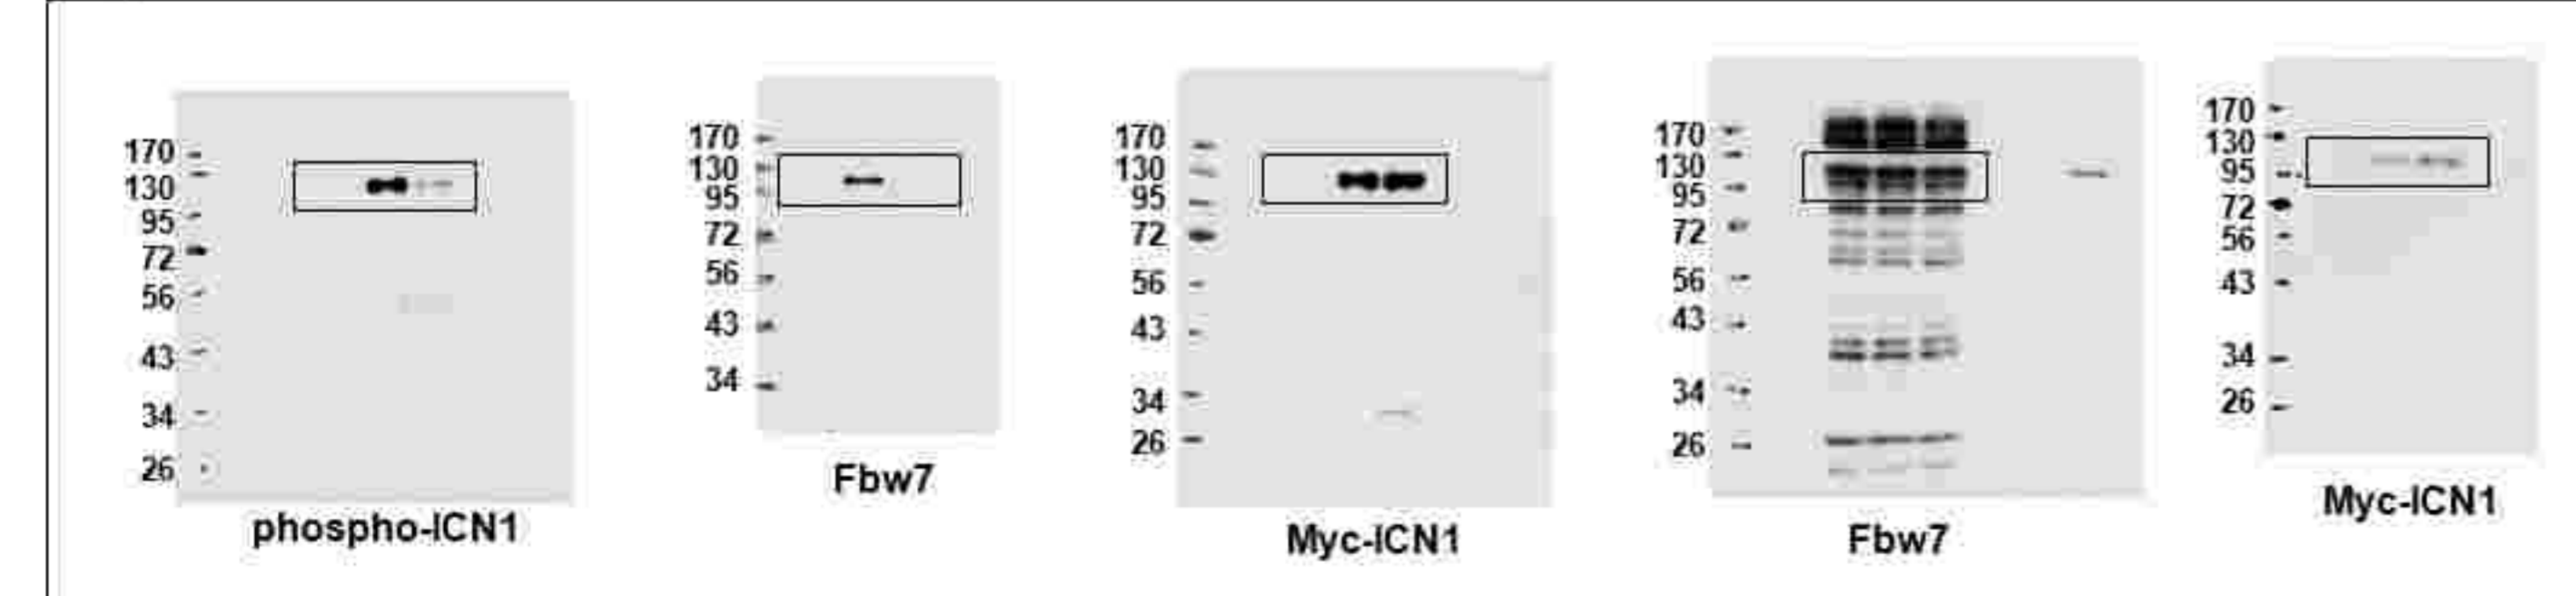

Figure 8e

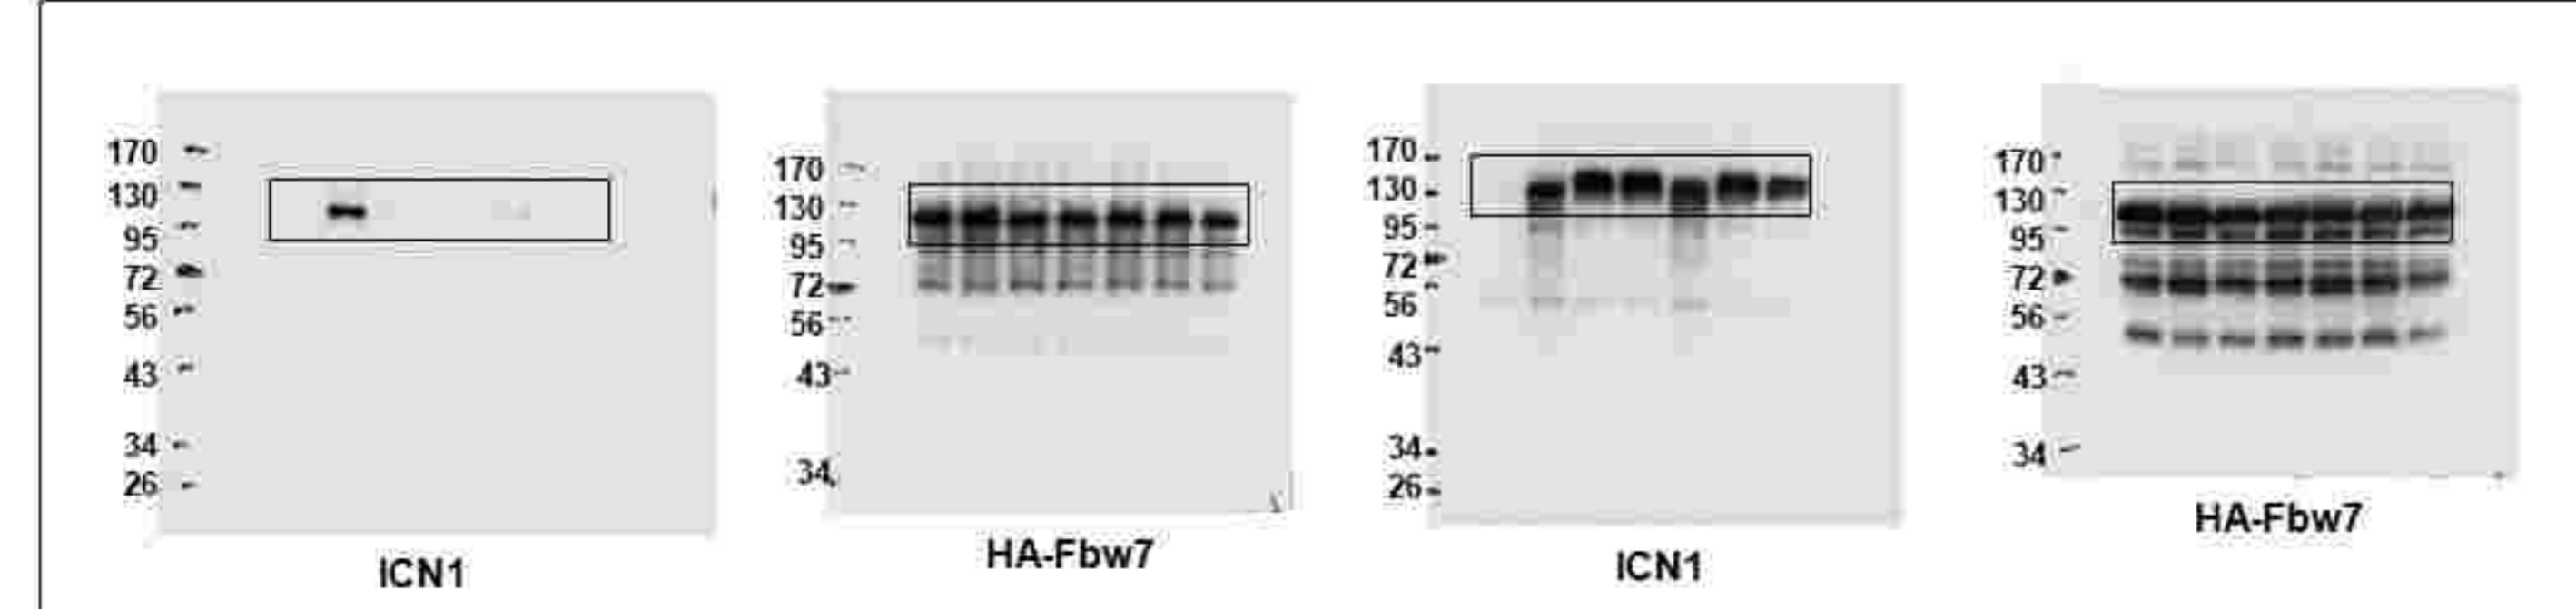

Figure 8d

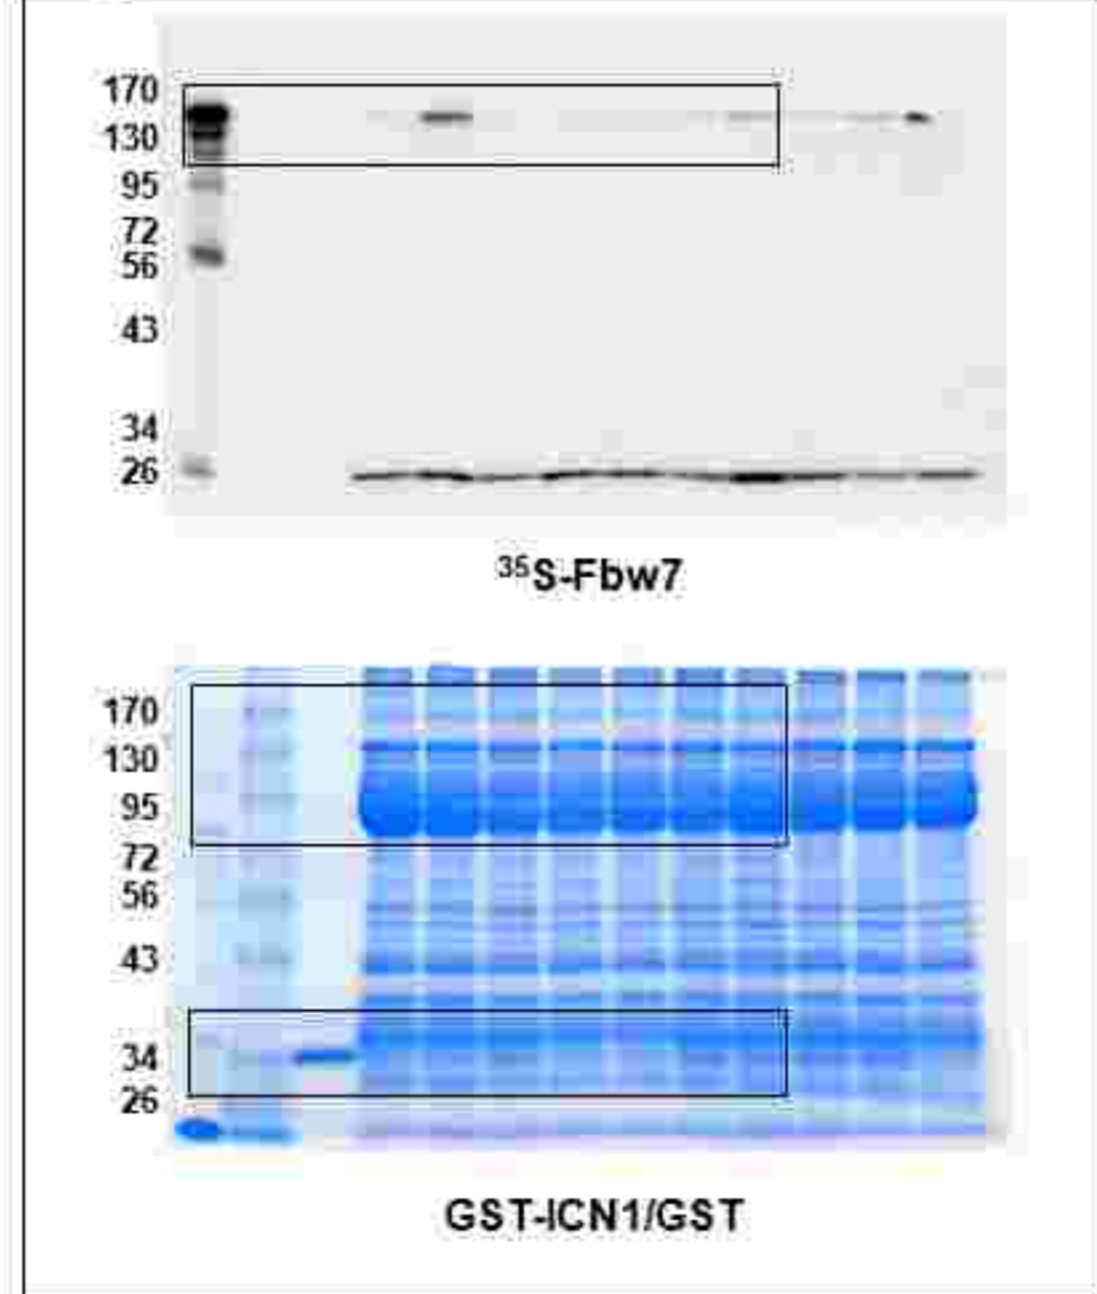

Supplement: NIHMS639903-supplement-Supplementary_Data_Fig_8.pdf [file NIHMS639903-supplement-Supplementary_Data_Fig_8.pdf]
