# Supplementary material
Source: PubMed Central journal article supplement (PMC4235773)
Supplement: NIHMS639903-supplement-Supplementary_Data_Fig_5.pdf [file NIHMS639903-supplement-Supplementary_Data_Fig_5.pdf]

# Supplementary Figure 5

## Synthetic Notch Peptide

EHPFL**T**P**S(1)**P**S(2)**PDQWPFK

### Cyclin C-CDK19

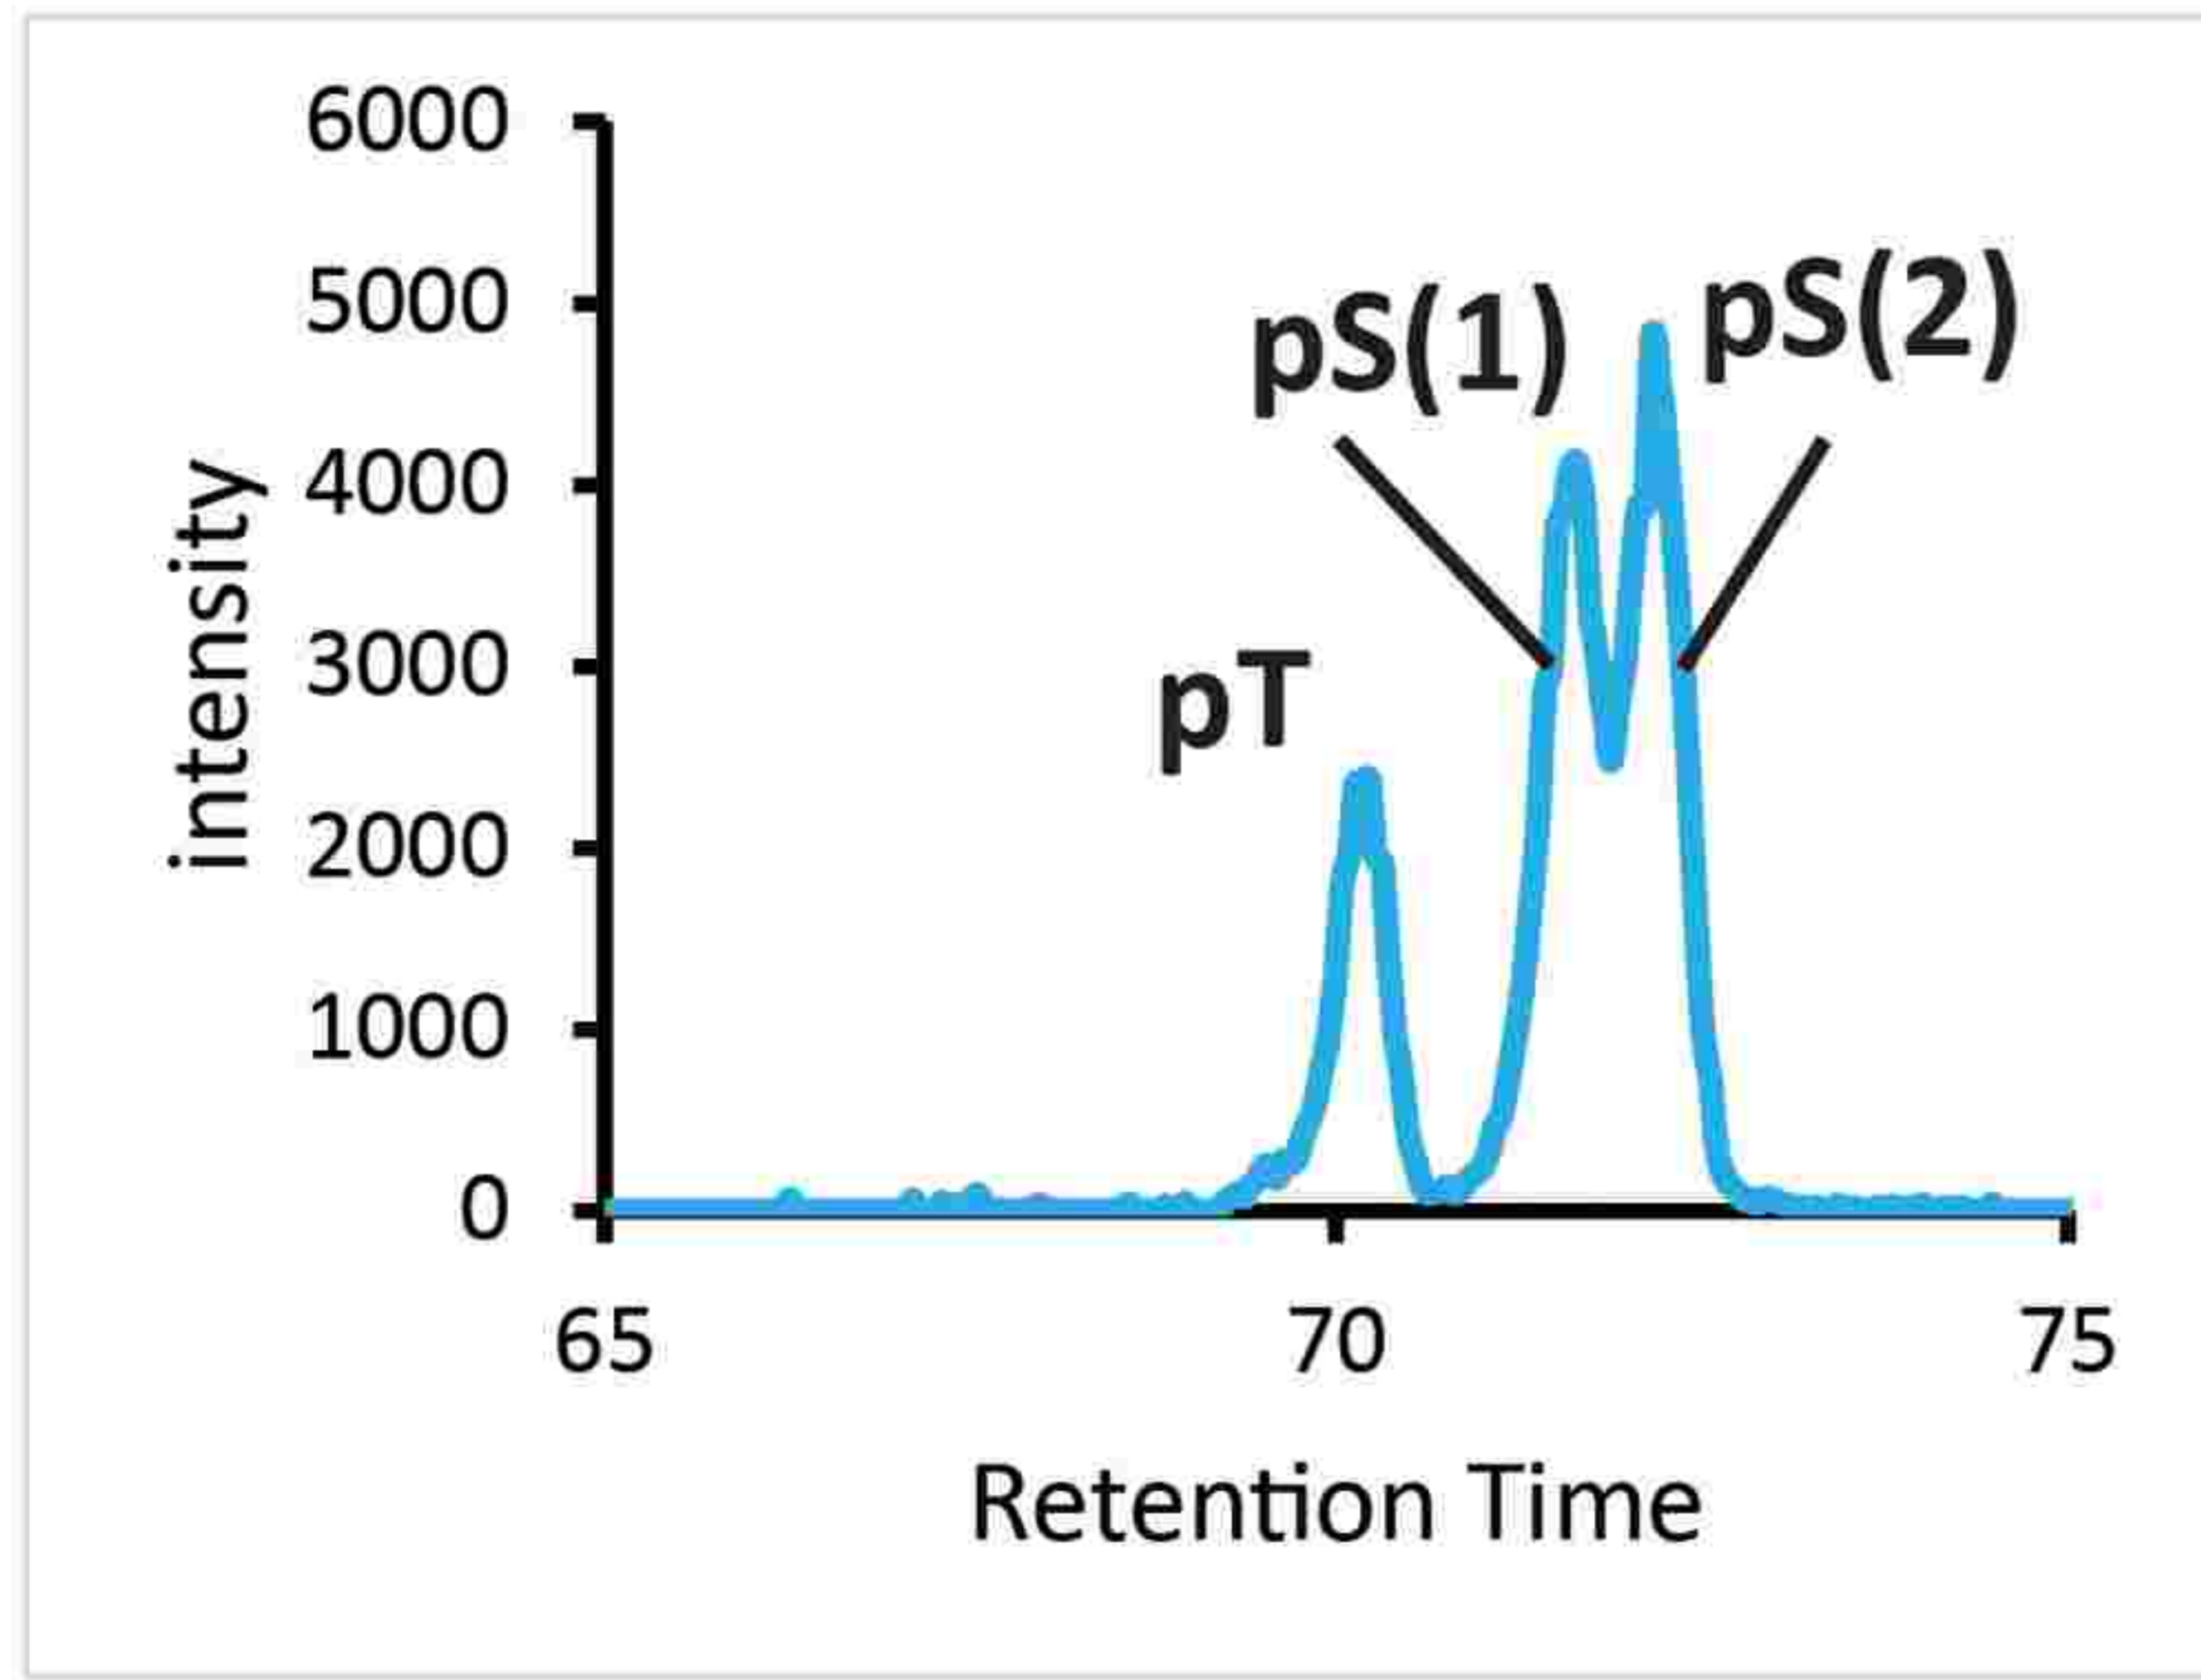

### Cyclin C-CDK3

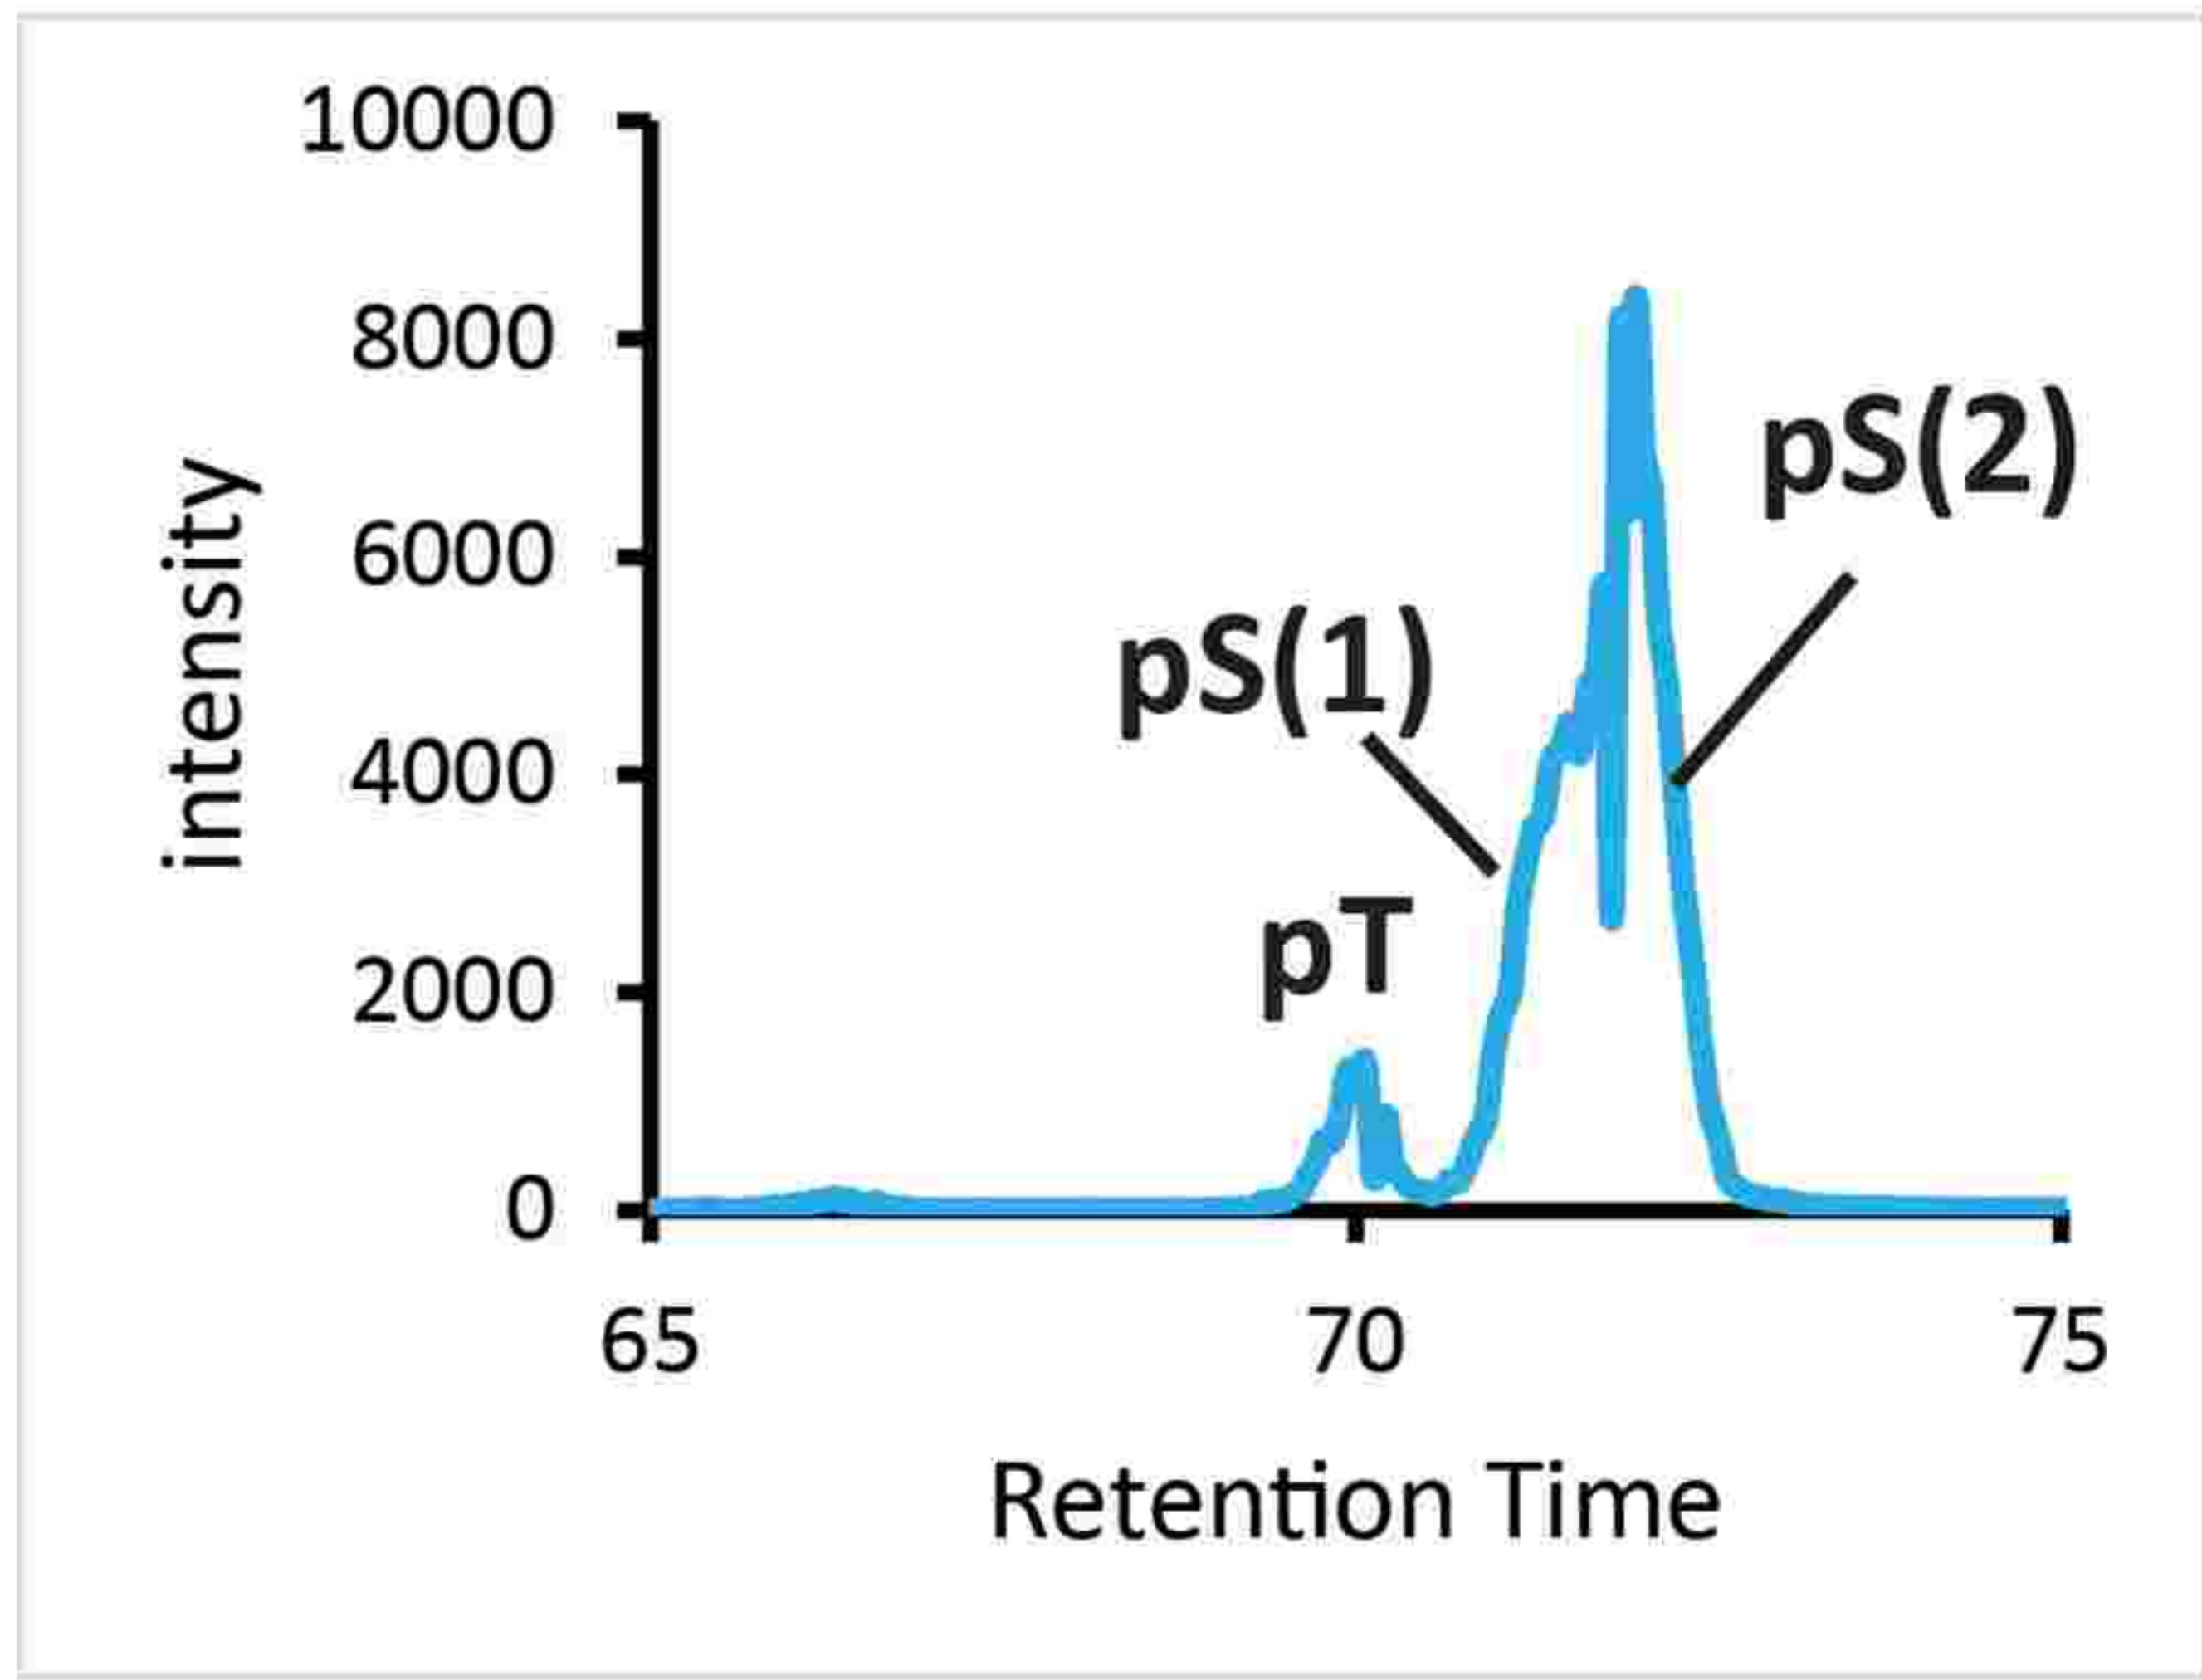

## Example MS2 spectra of Identified Phosphopeptides

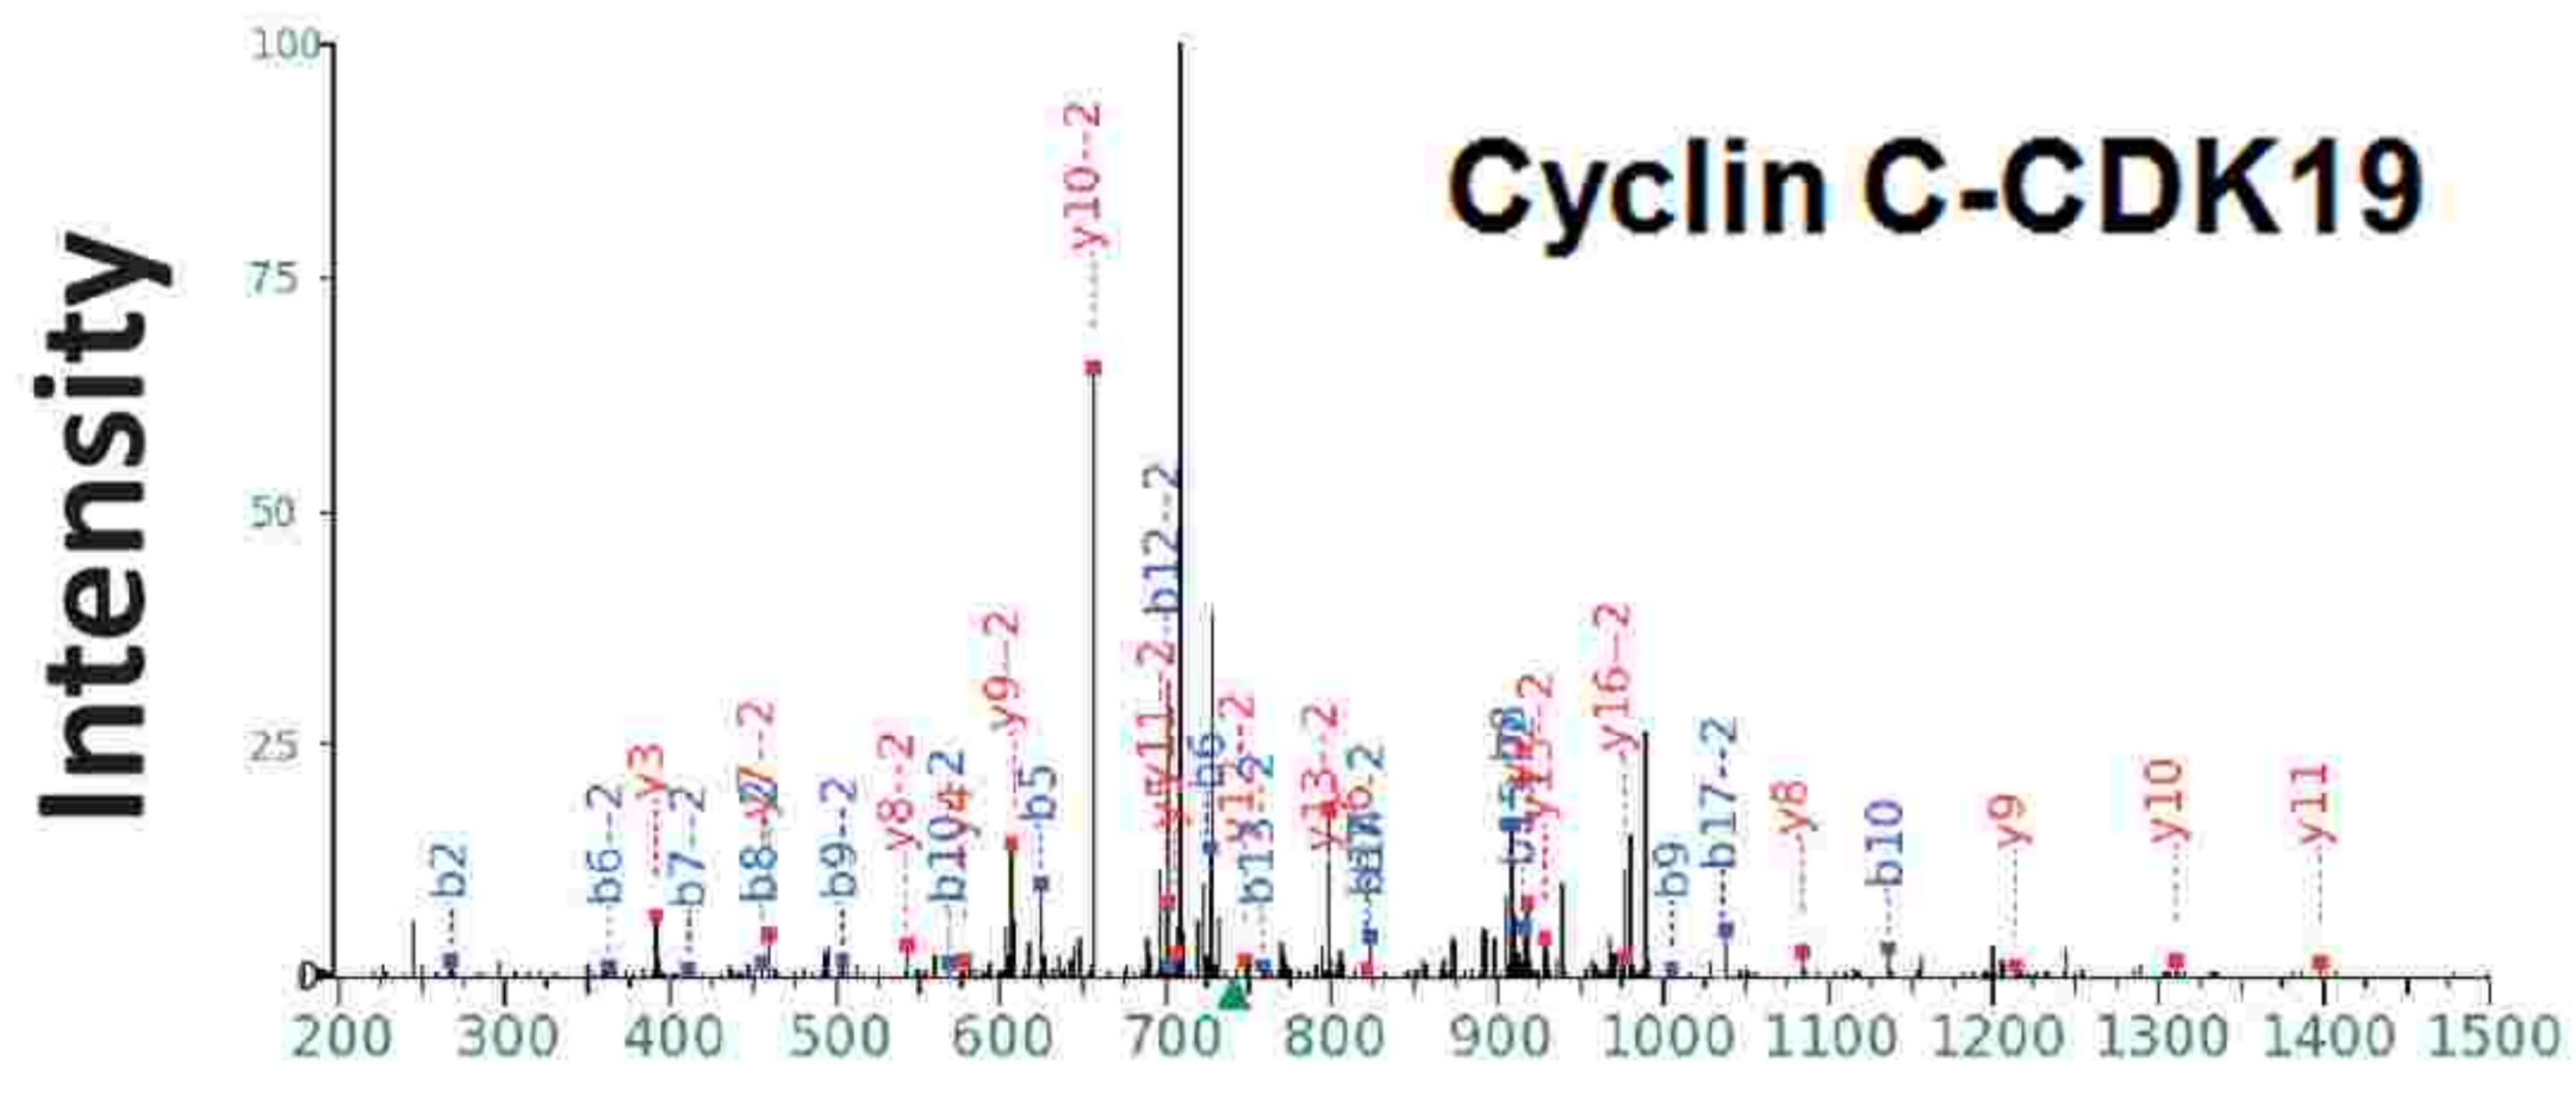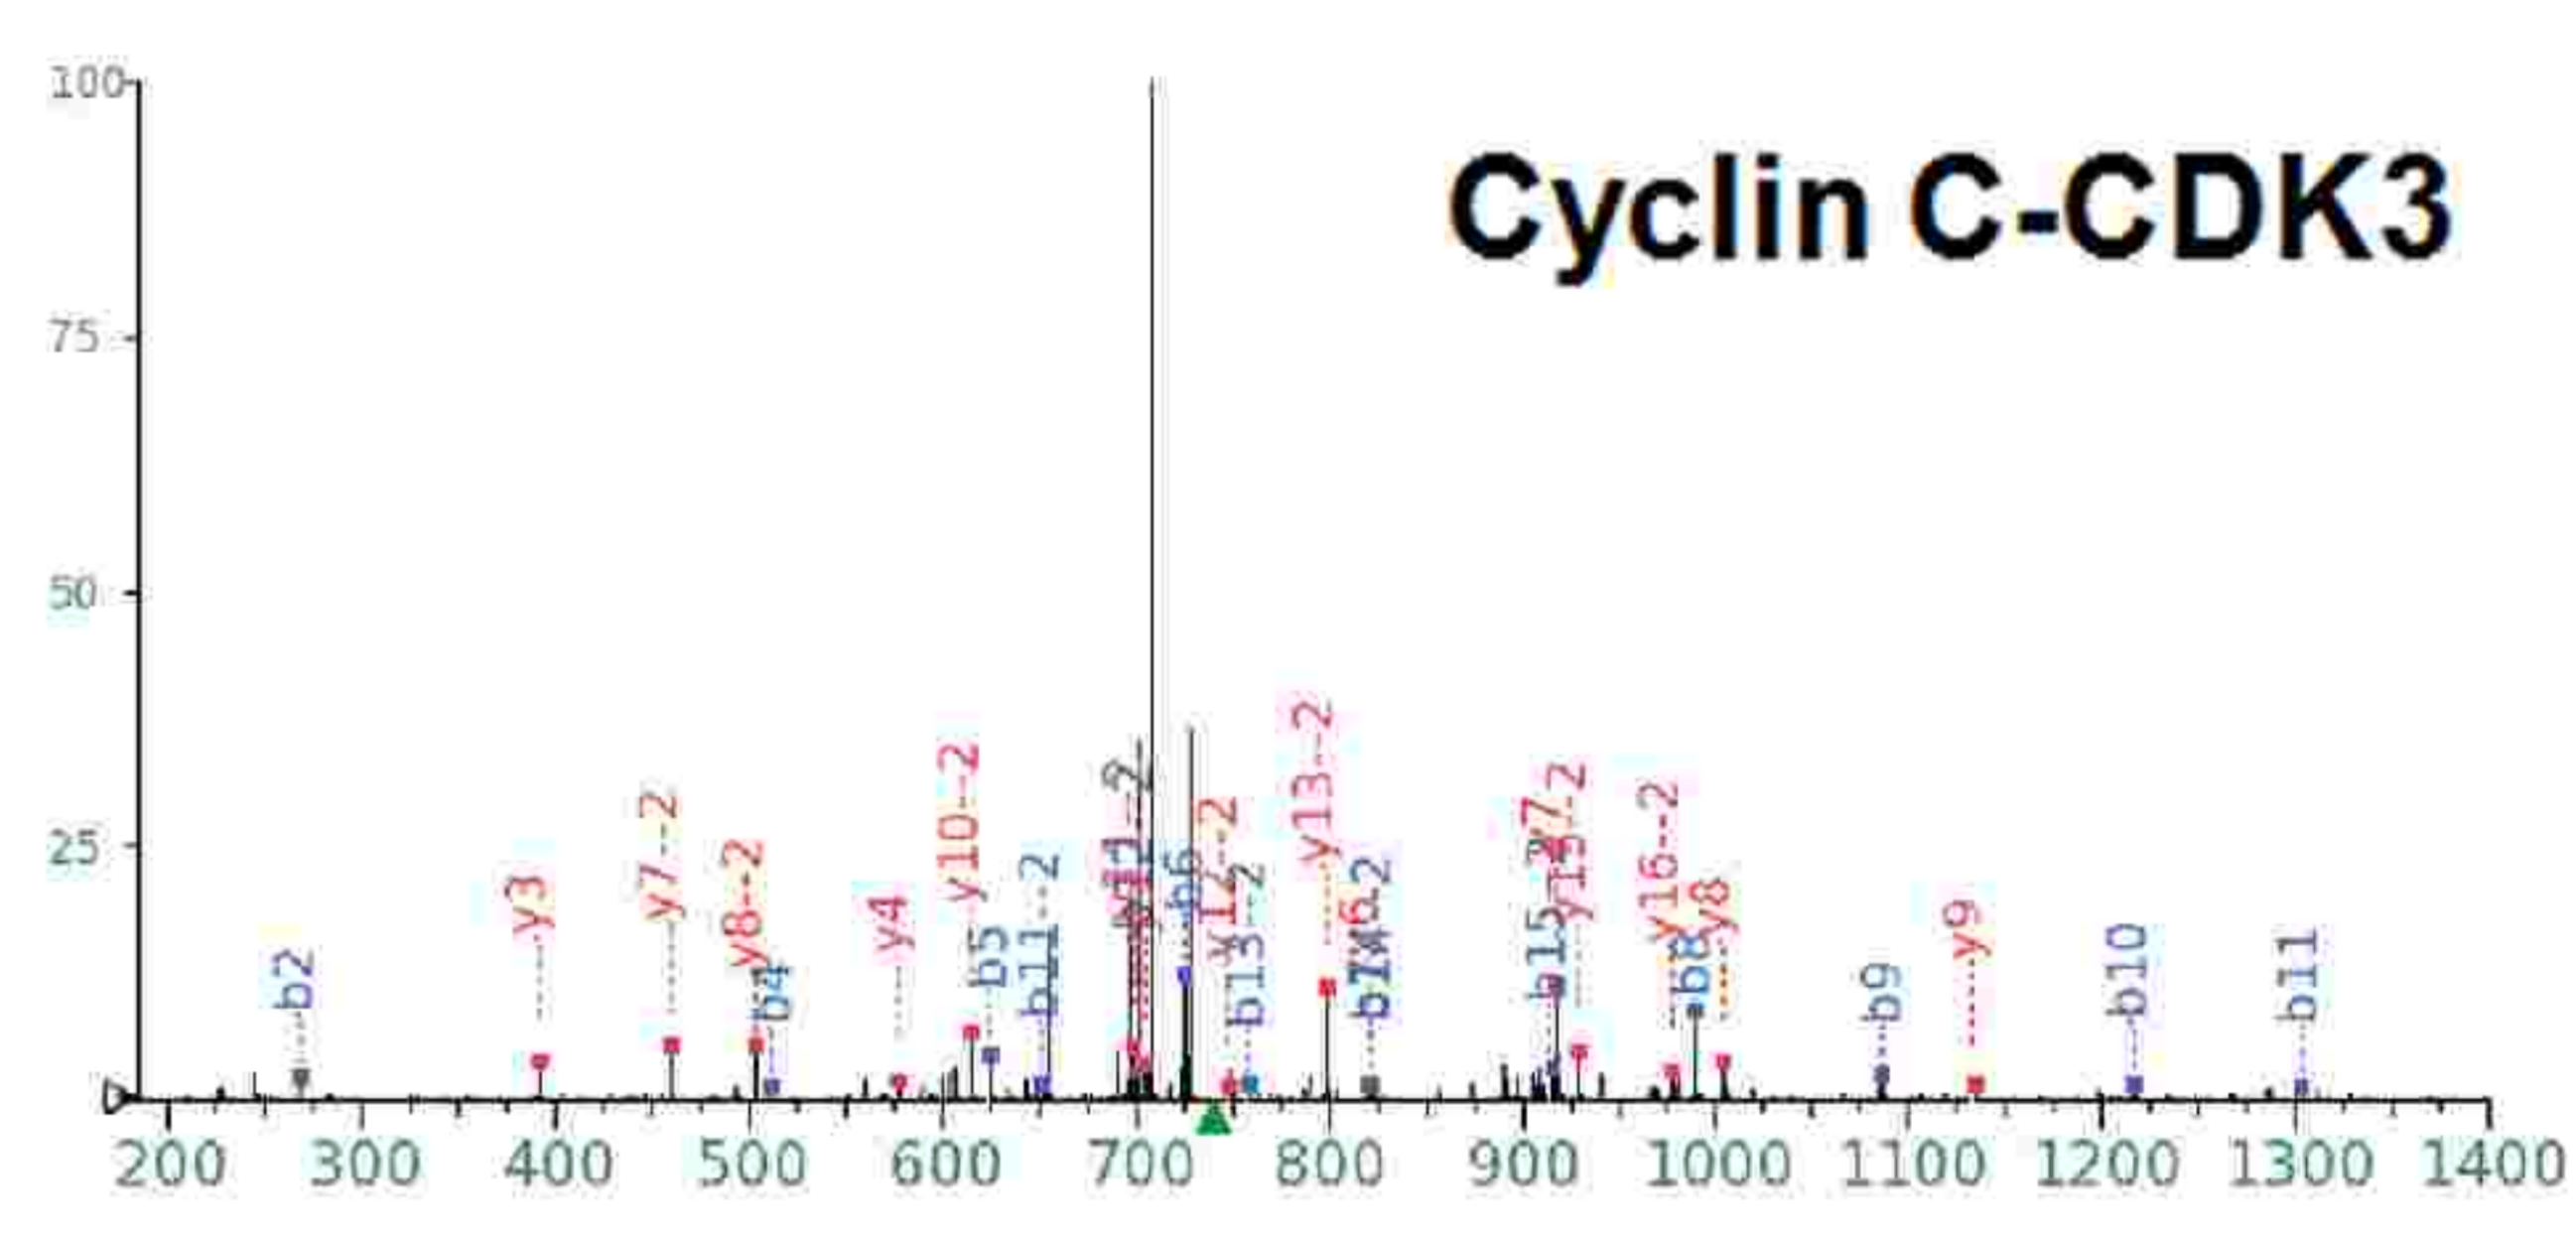

m/z
