# Supplementary material
Source: PubMed Central journal article supplement (PMC4235773)

# Supplementary Figure 1

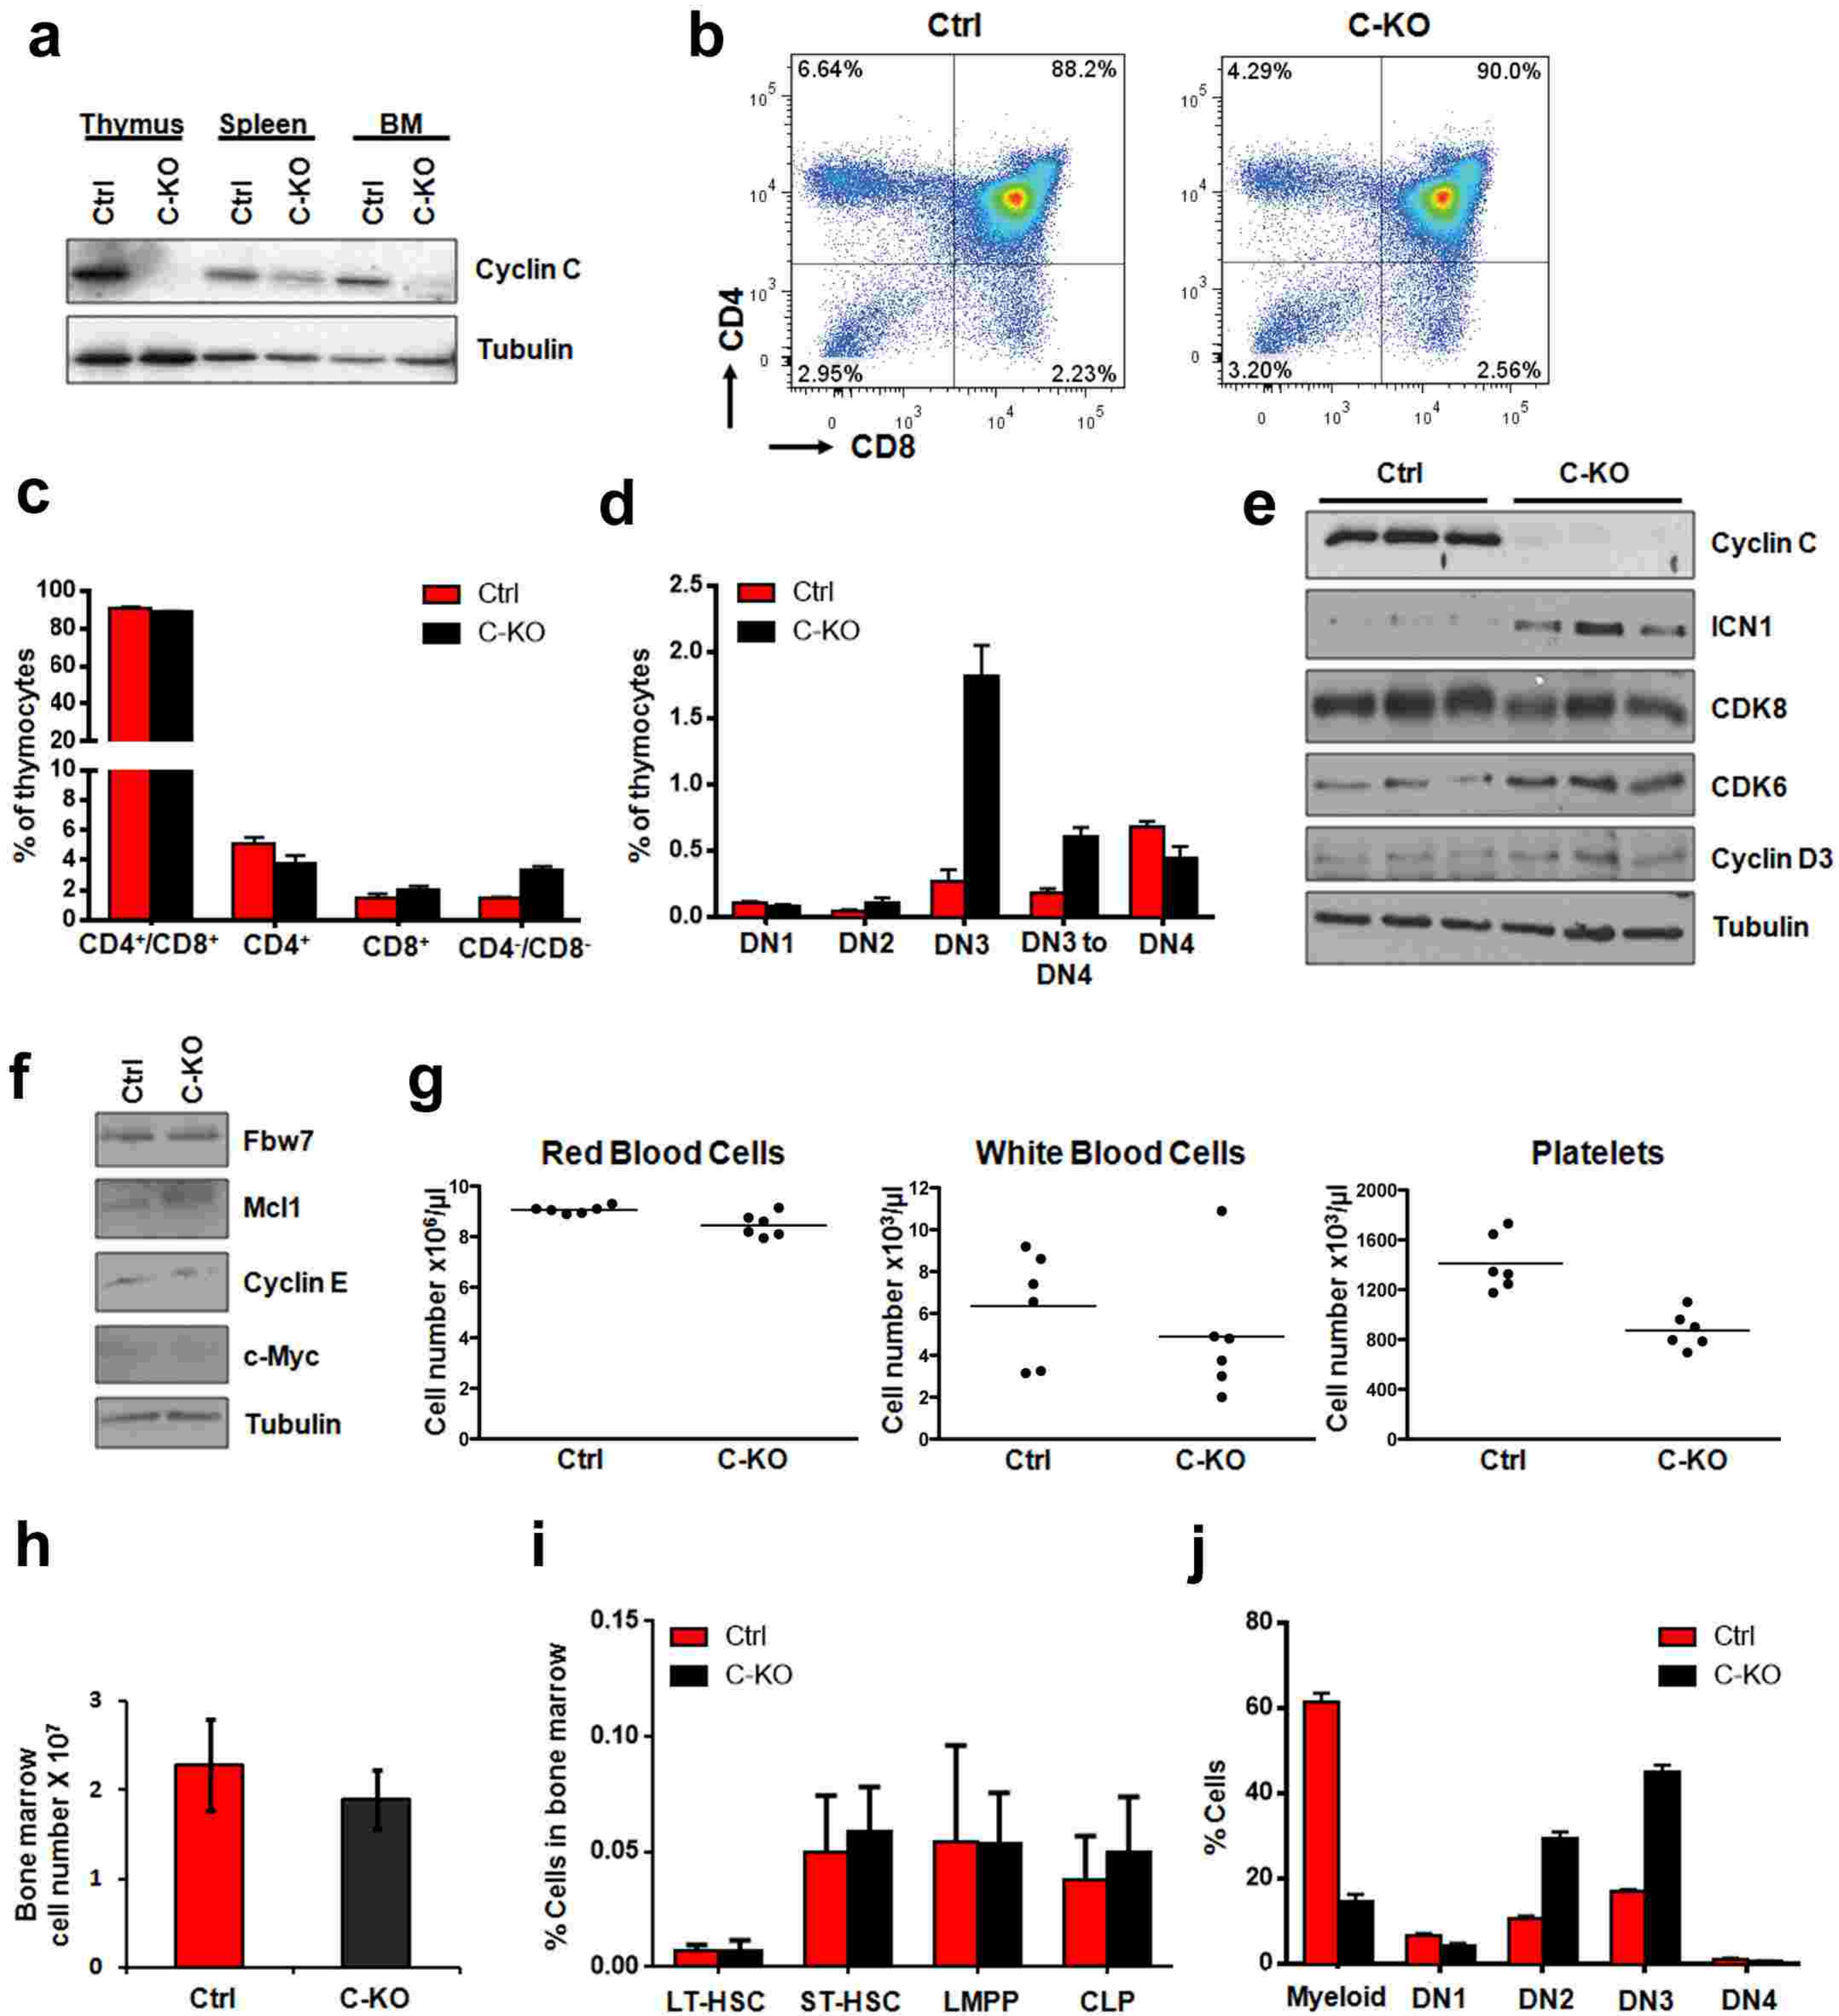

Supplement: NIHMS639903-supplement-Supplementary_Data_Fig_1.pdf [file NIHMS639903-supplement-Supplementary_Data_Fig_1.pdf]

# Supplementary Figure 2

**a**

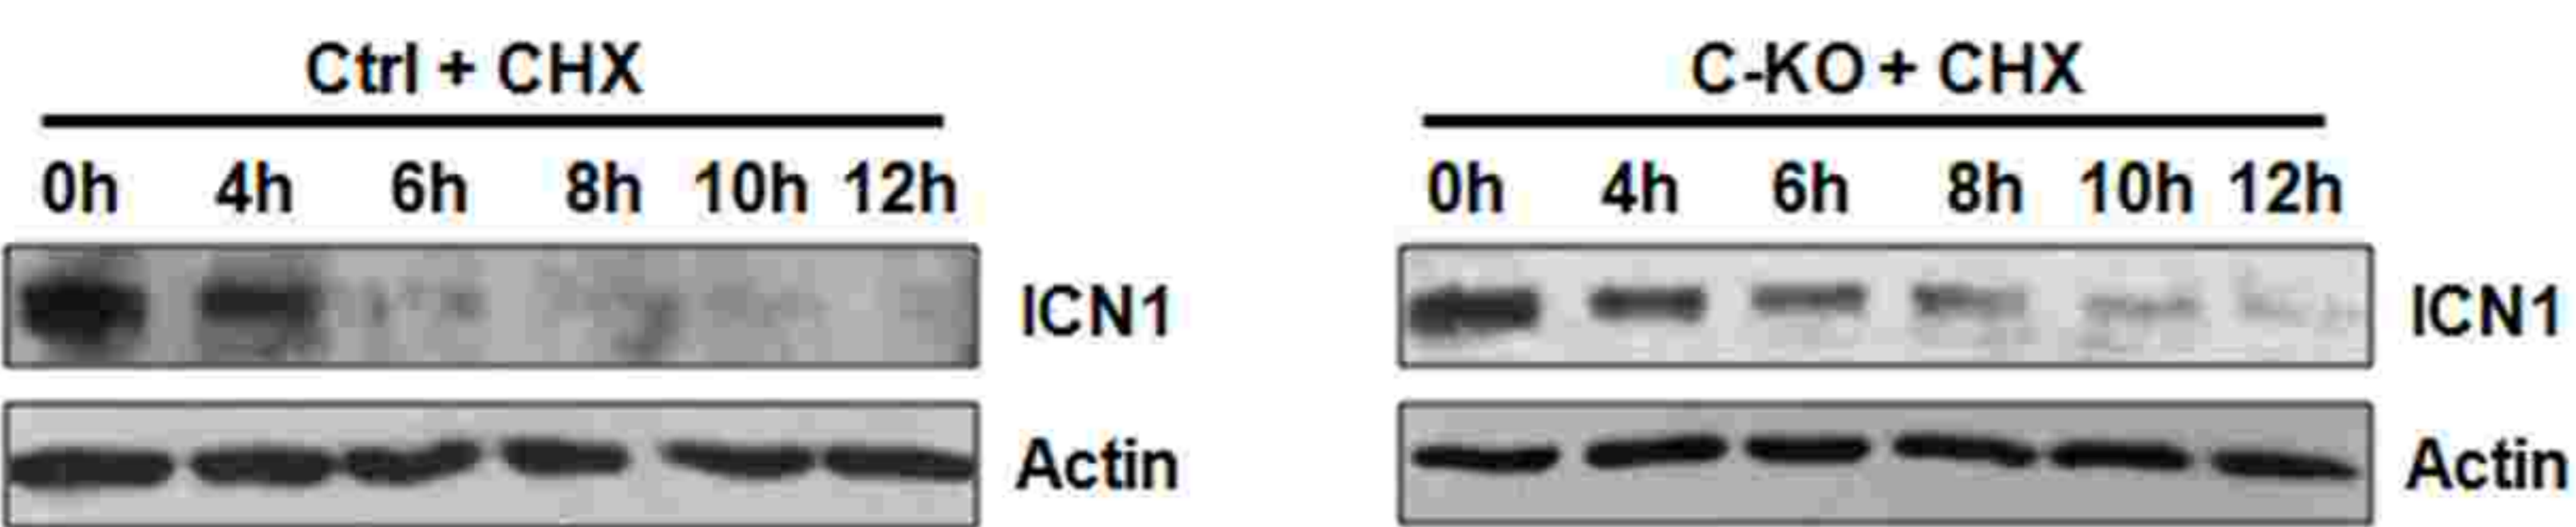

**b**

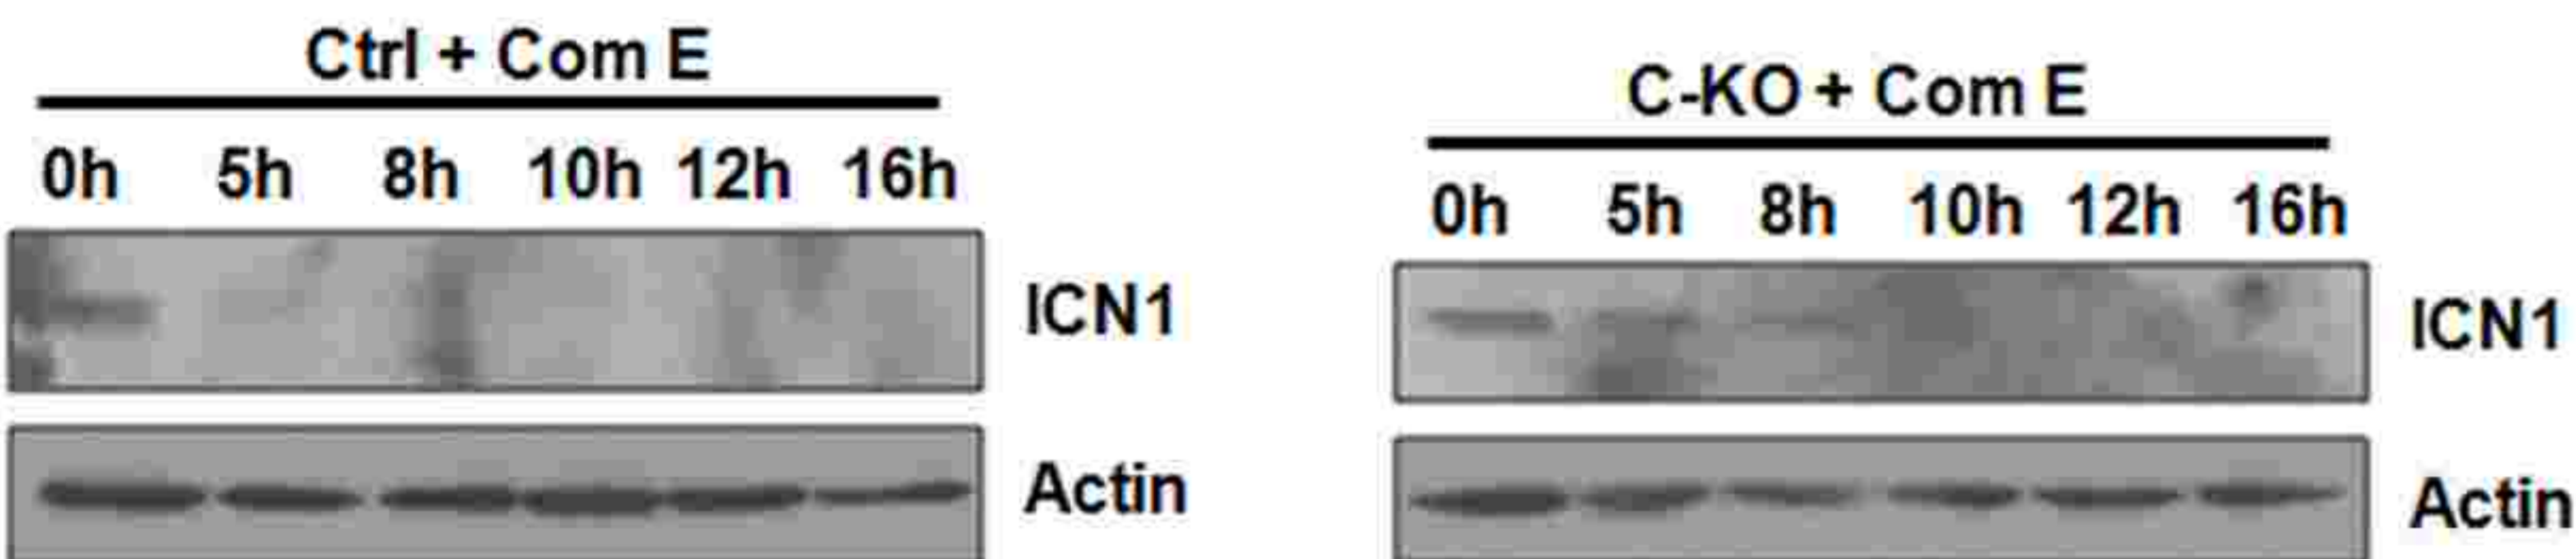

**c**

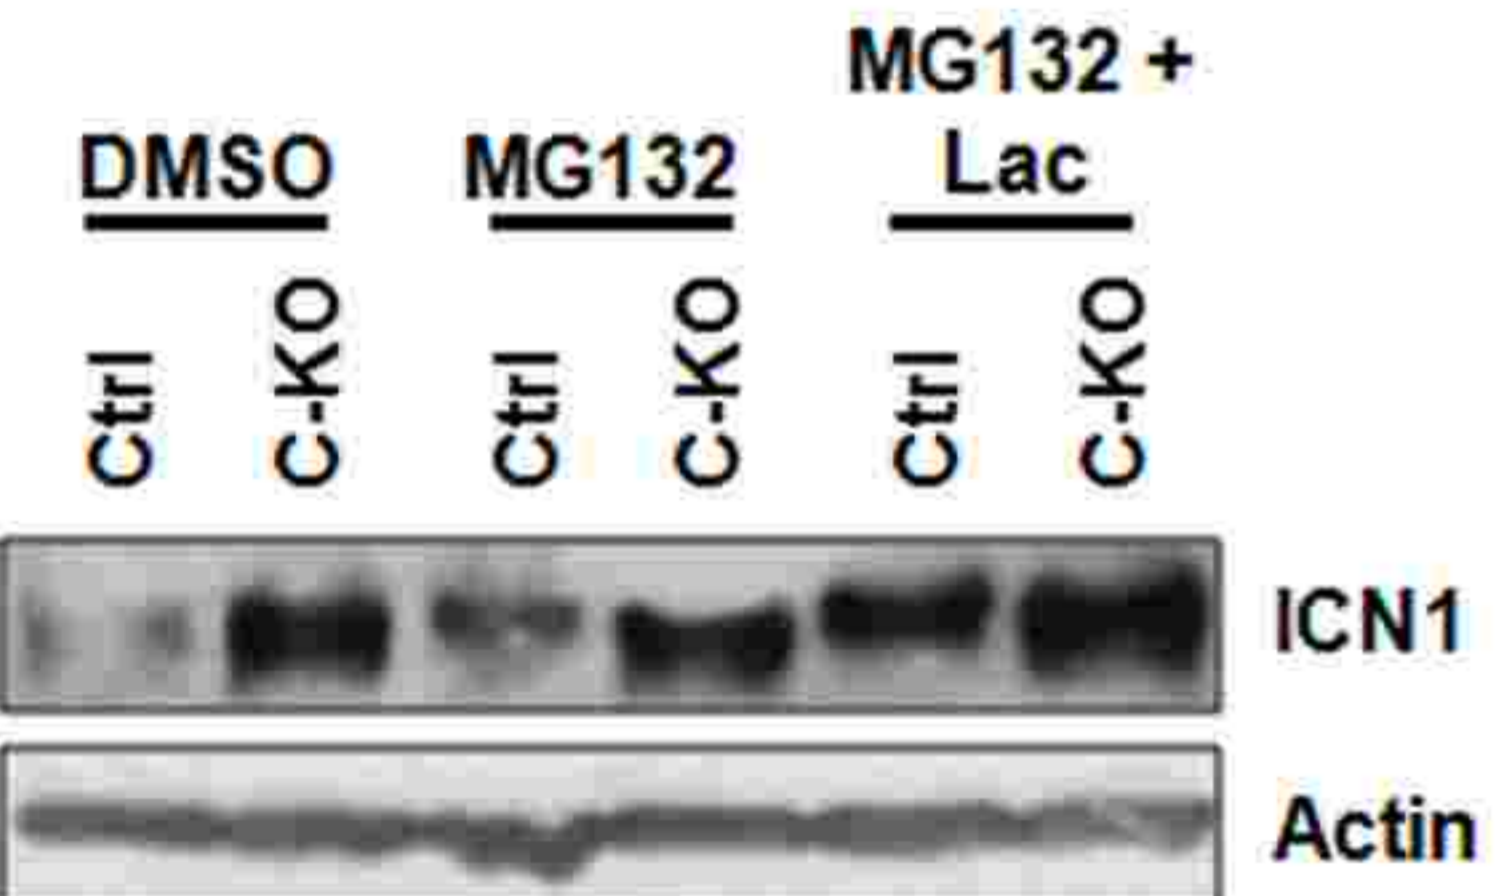

Supplement: NIHMS639903-supplement-Supplementary_Data_Fig_2.pdf [file NIHMS639903-supplement-Supplementary_Data_Fig_2.pdf]

# Supplementary Figure 3

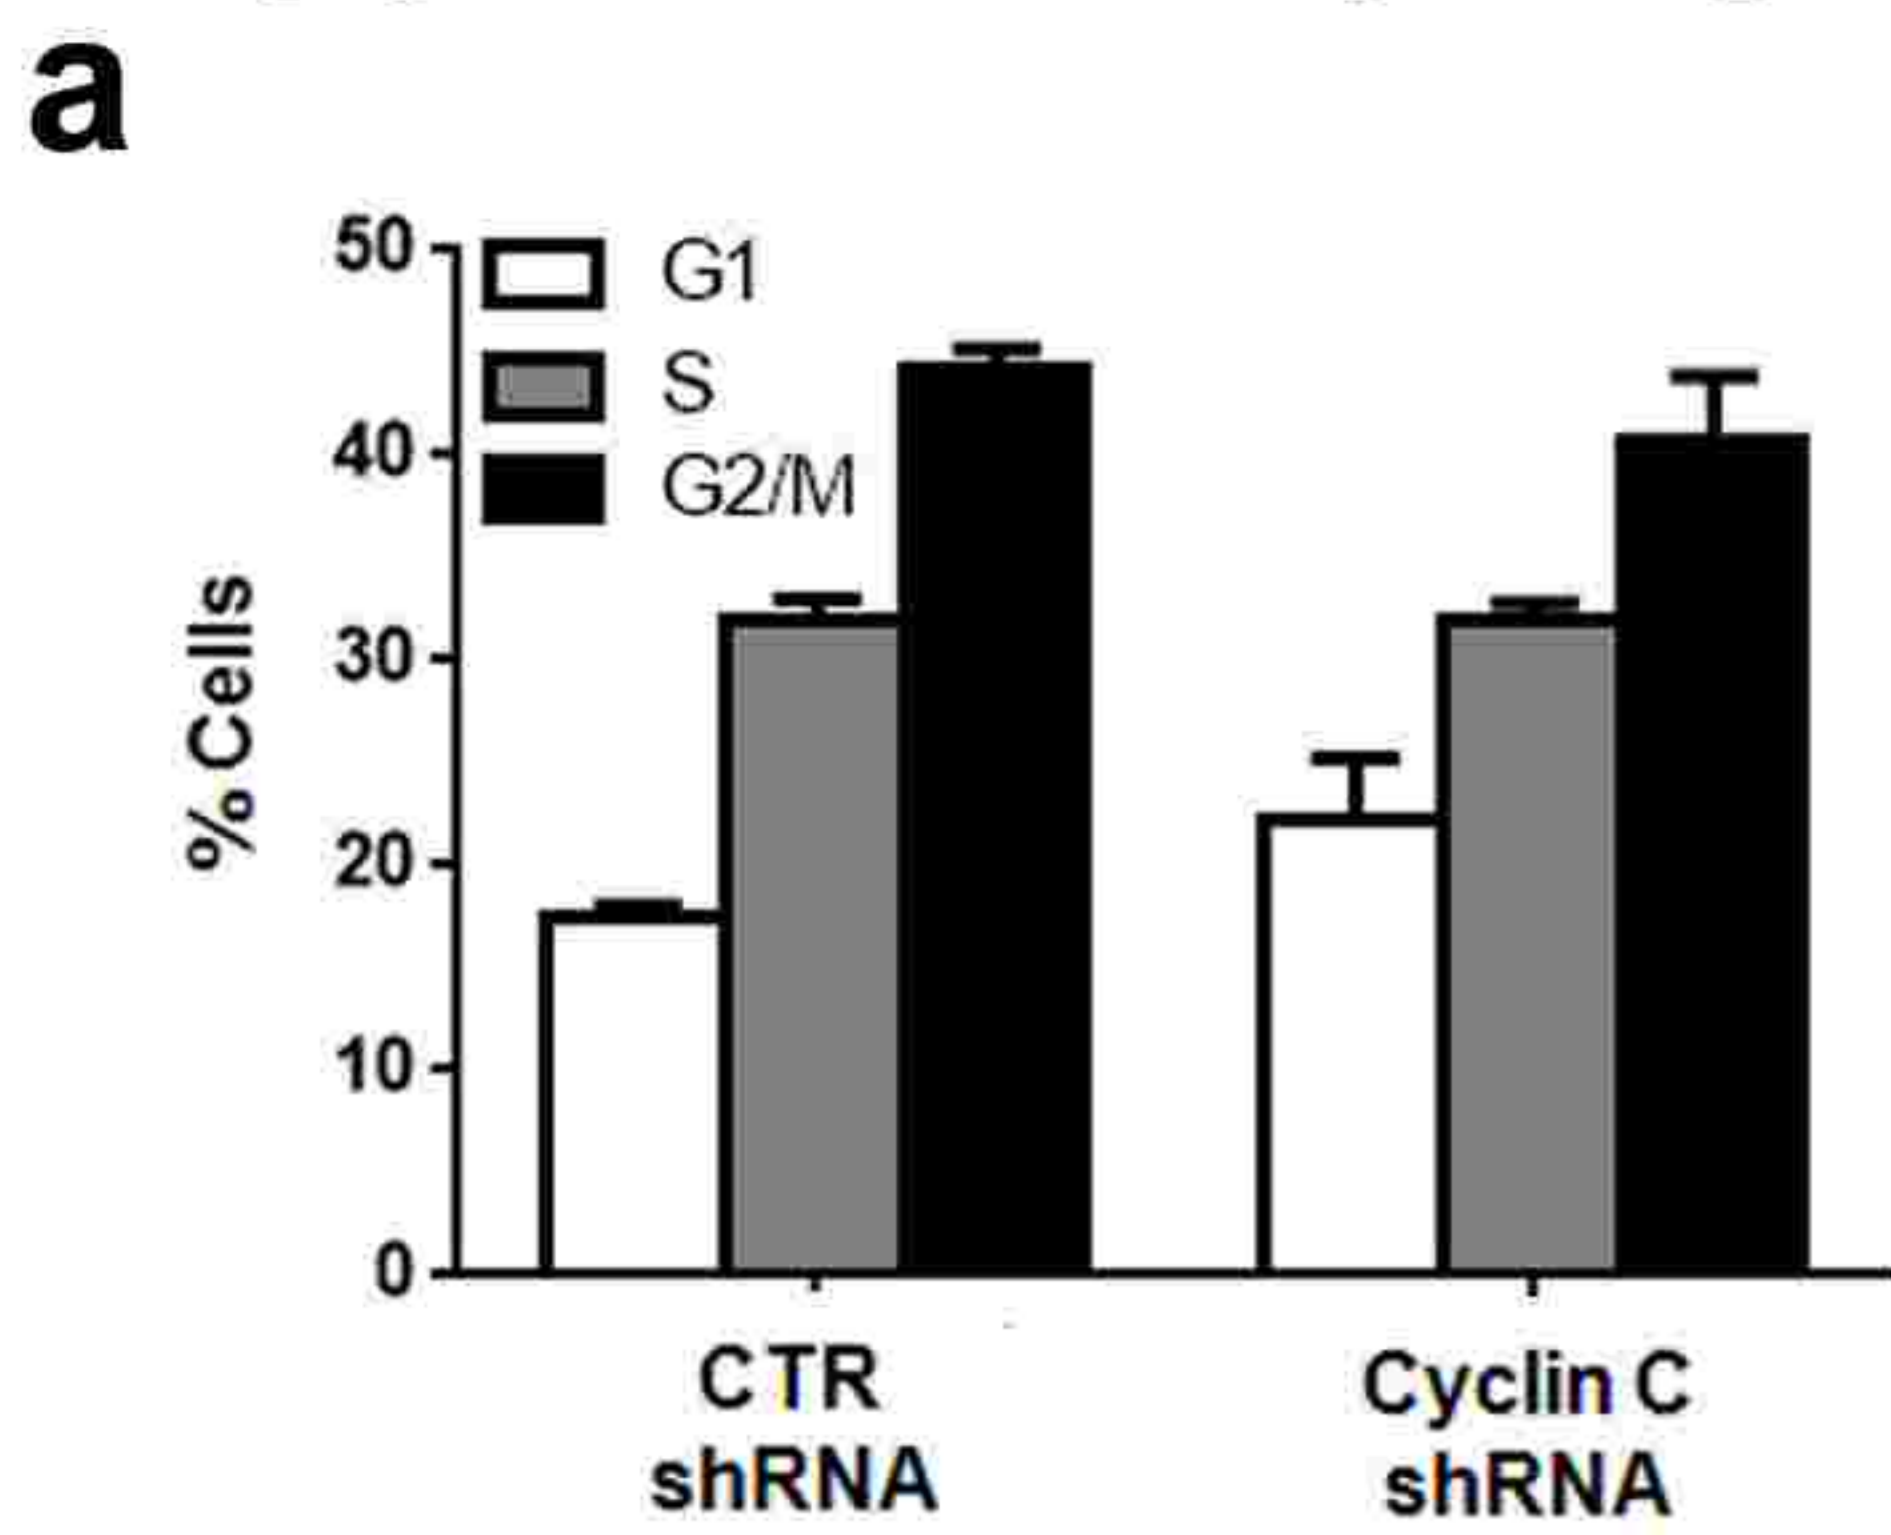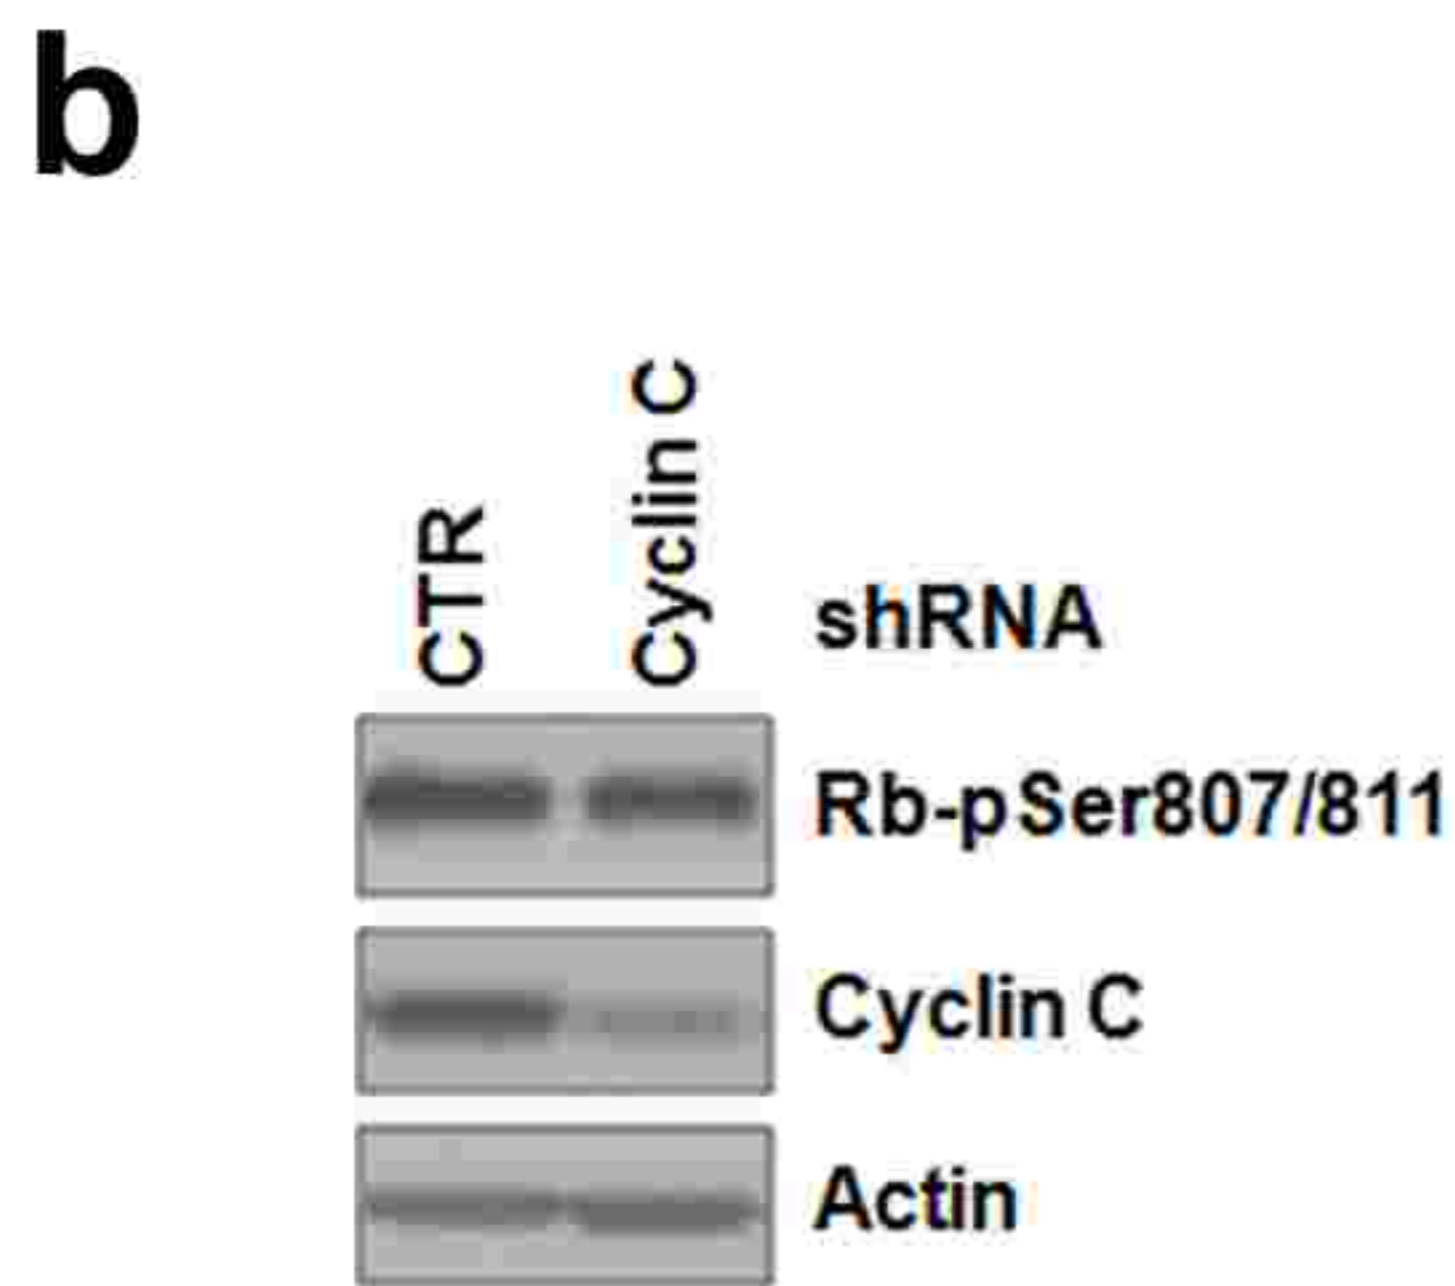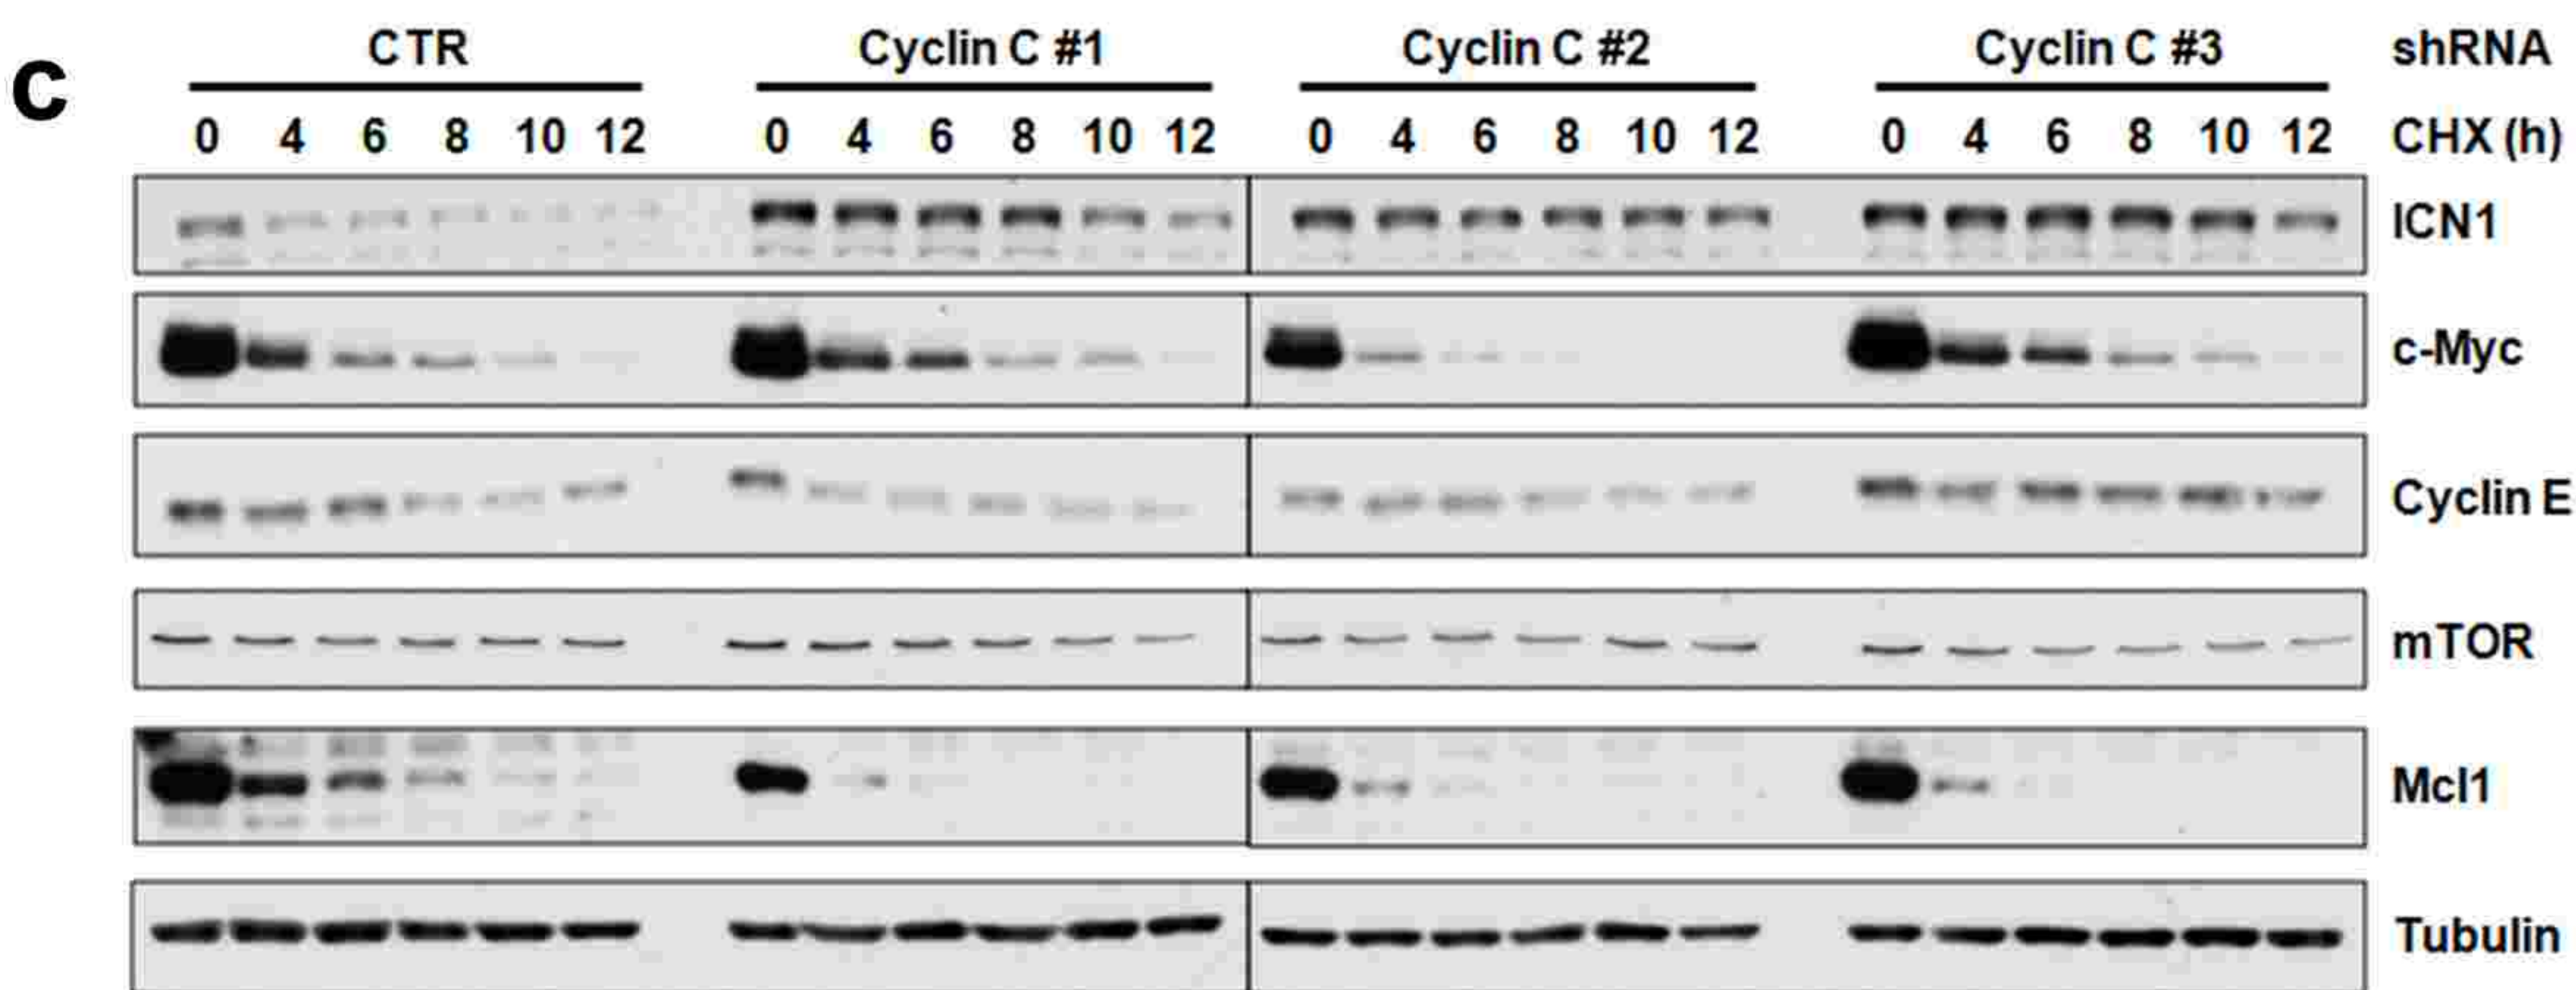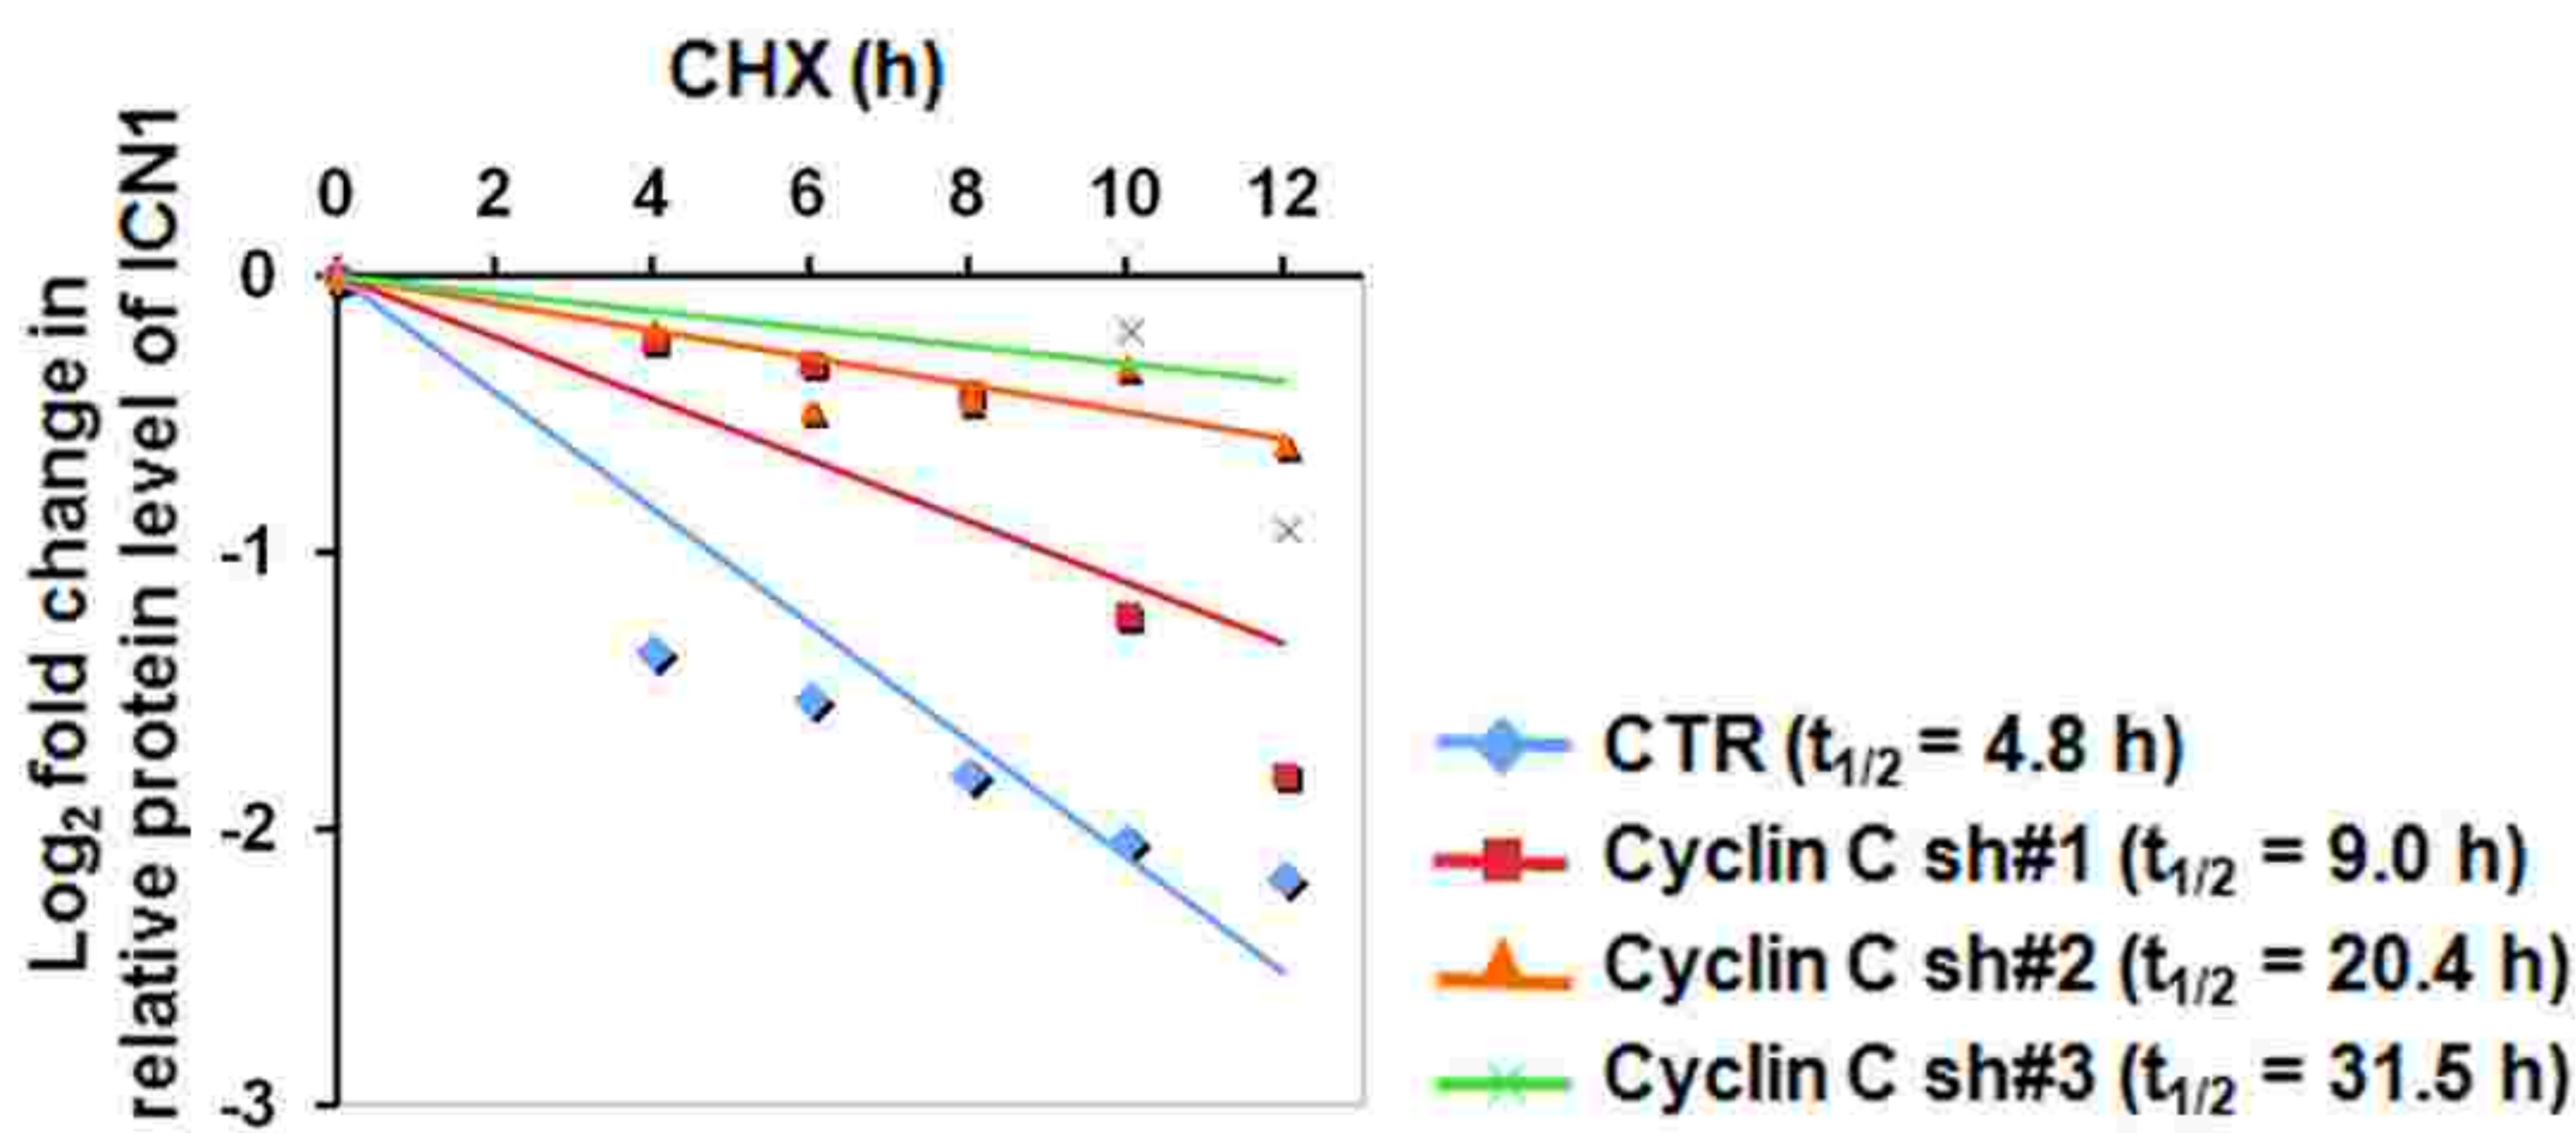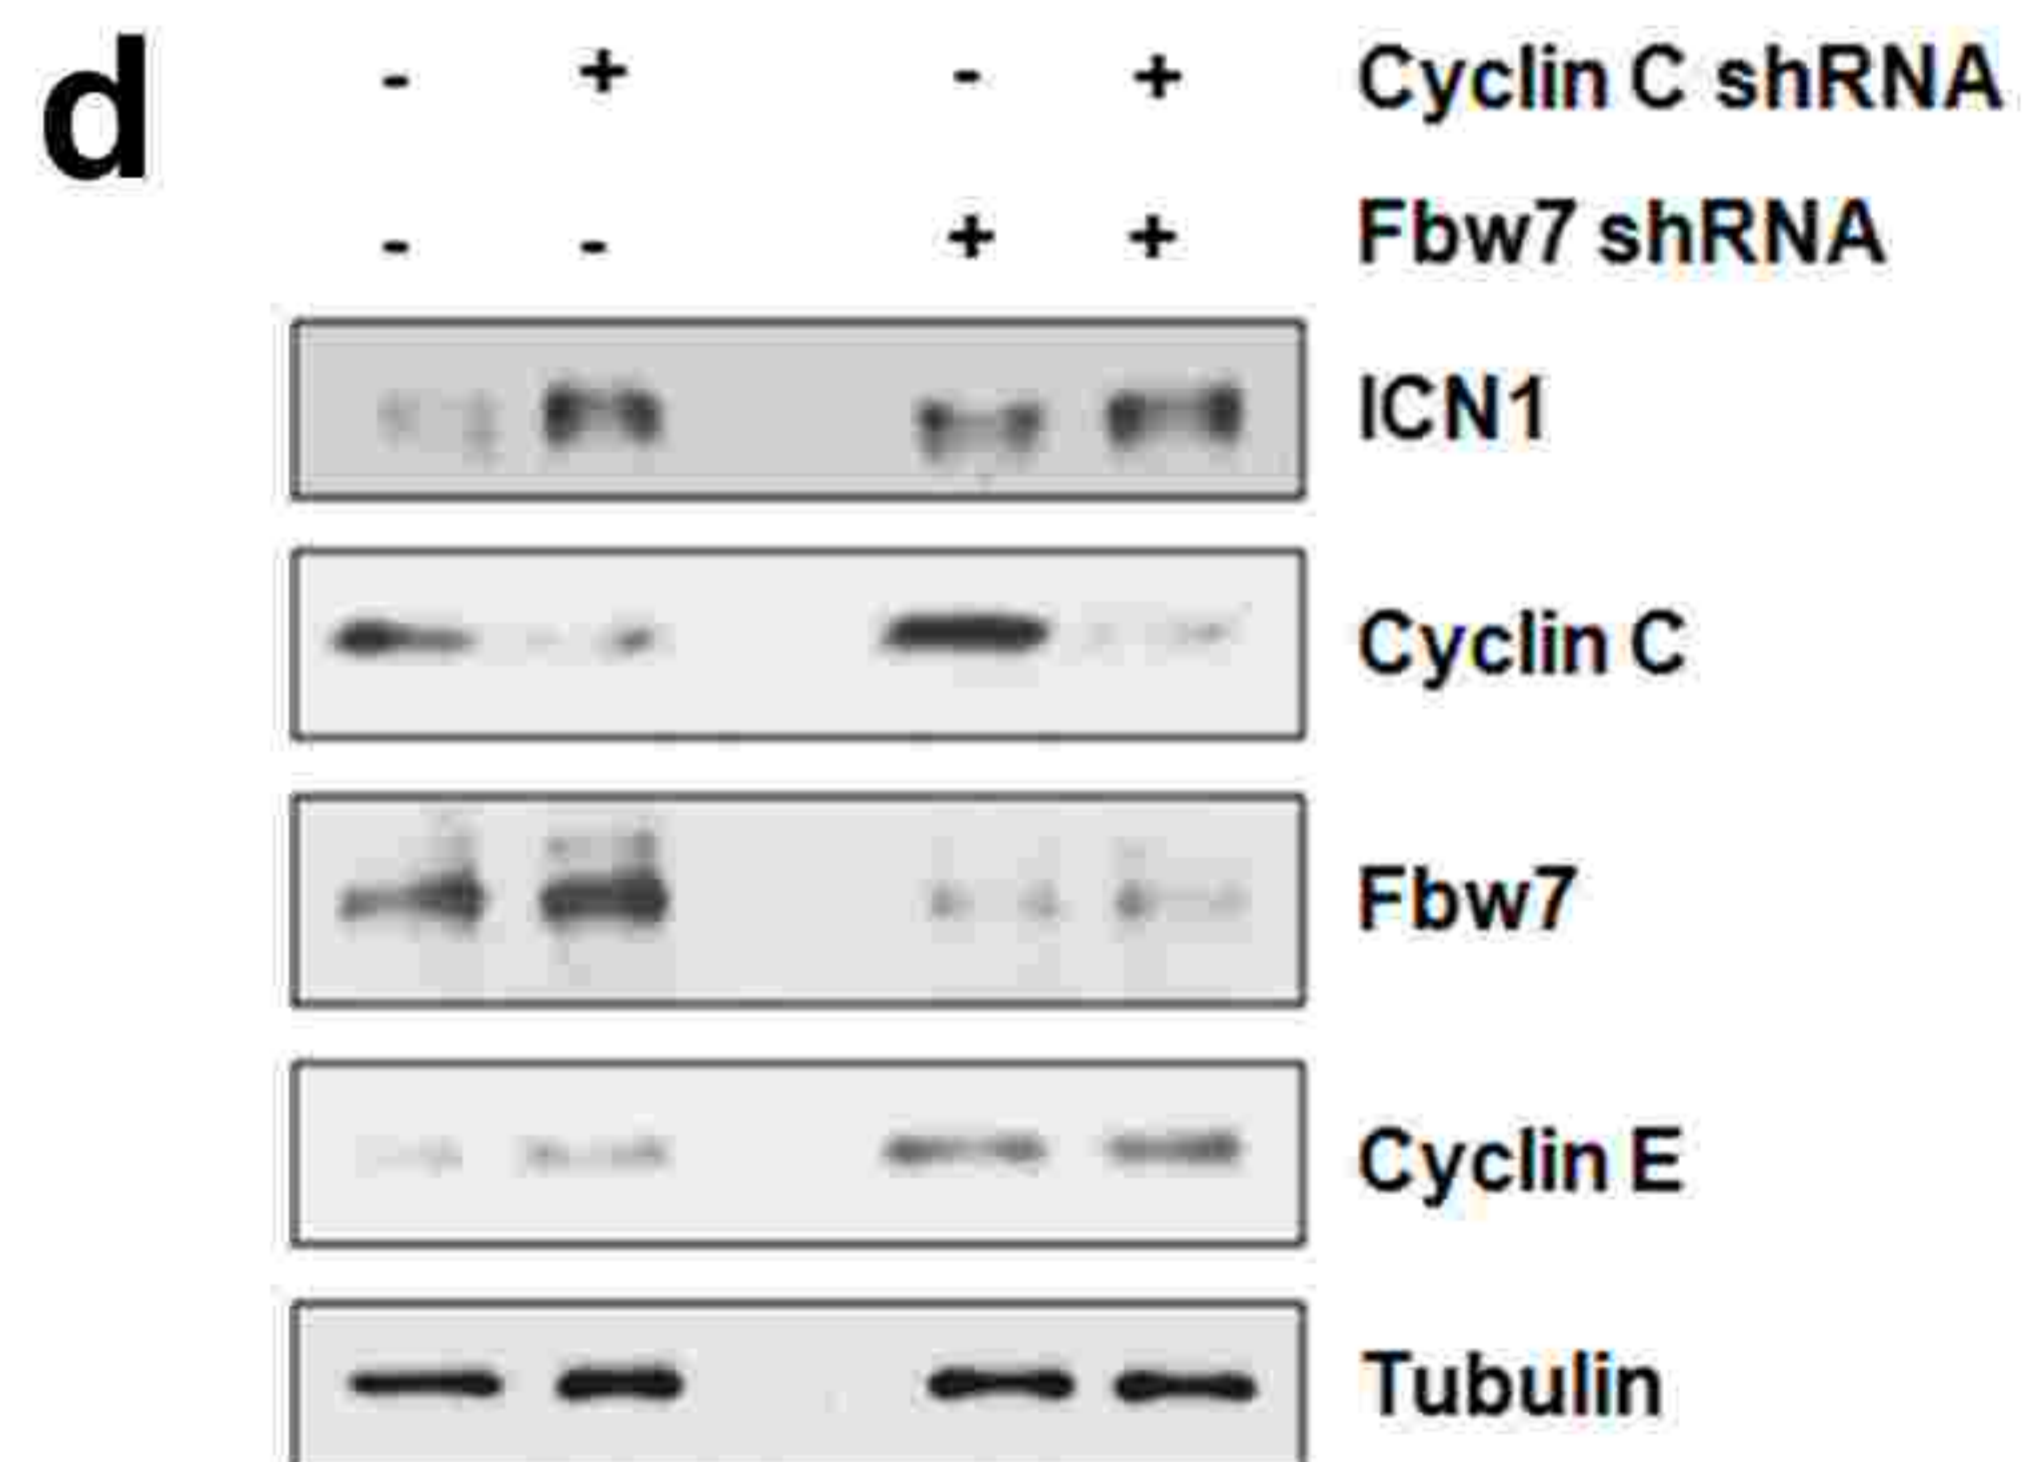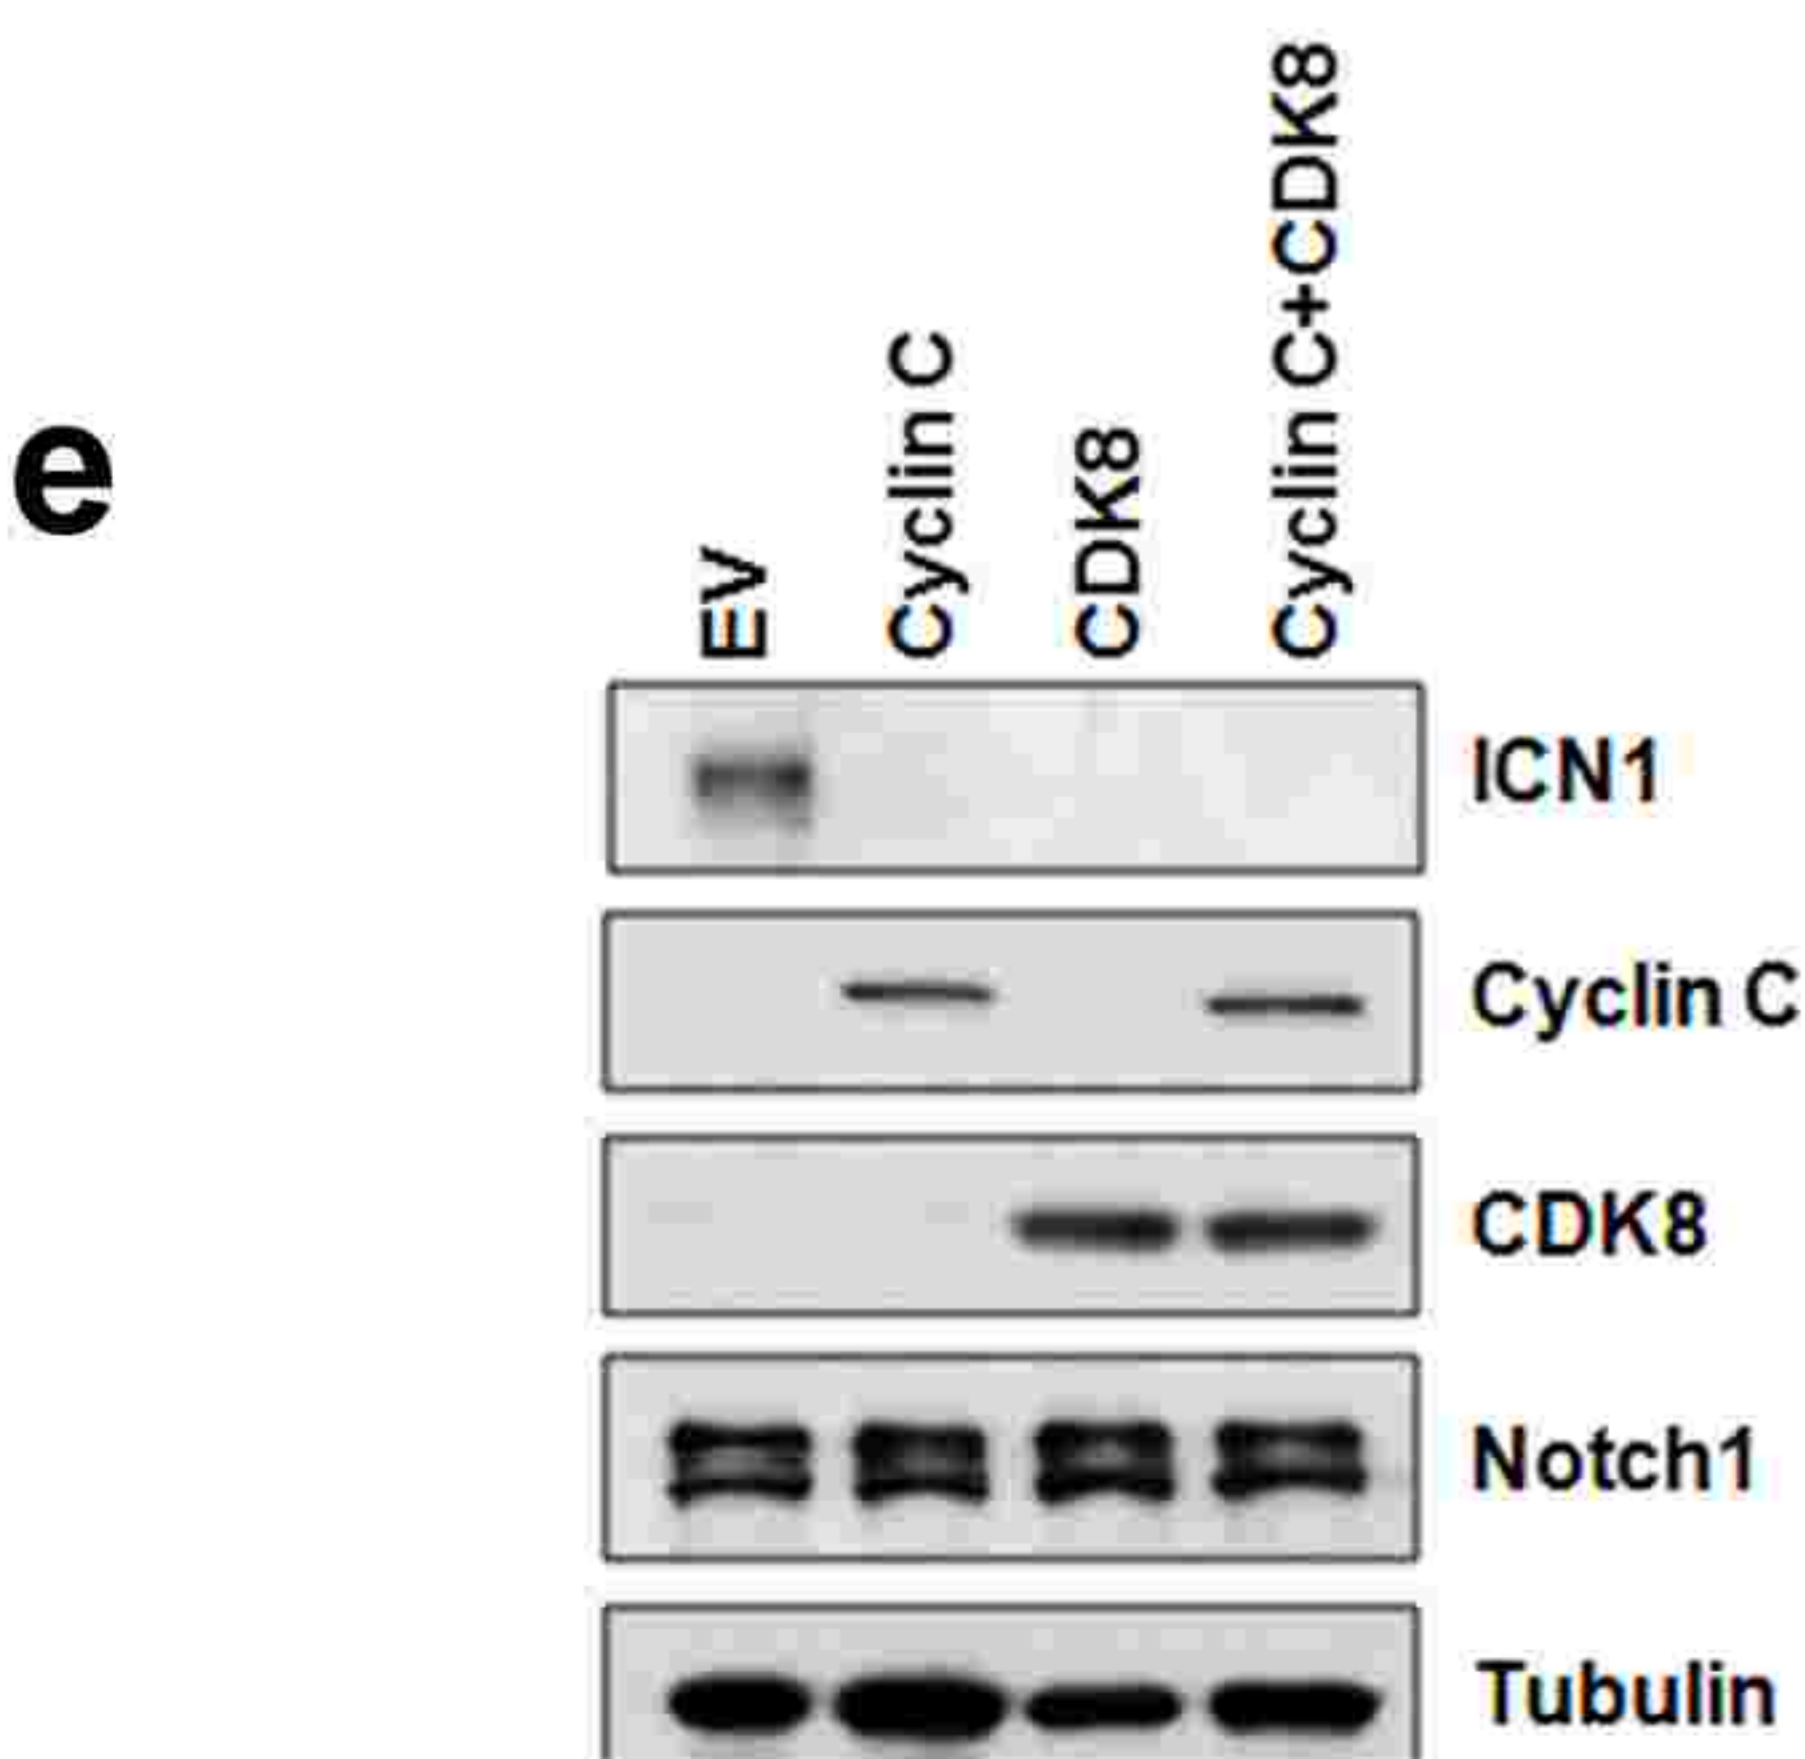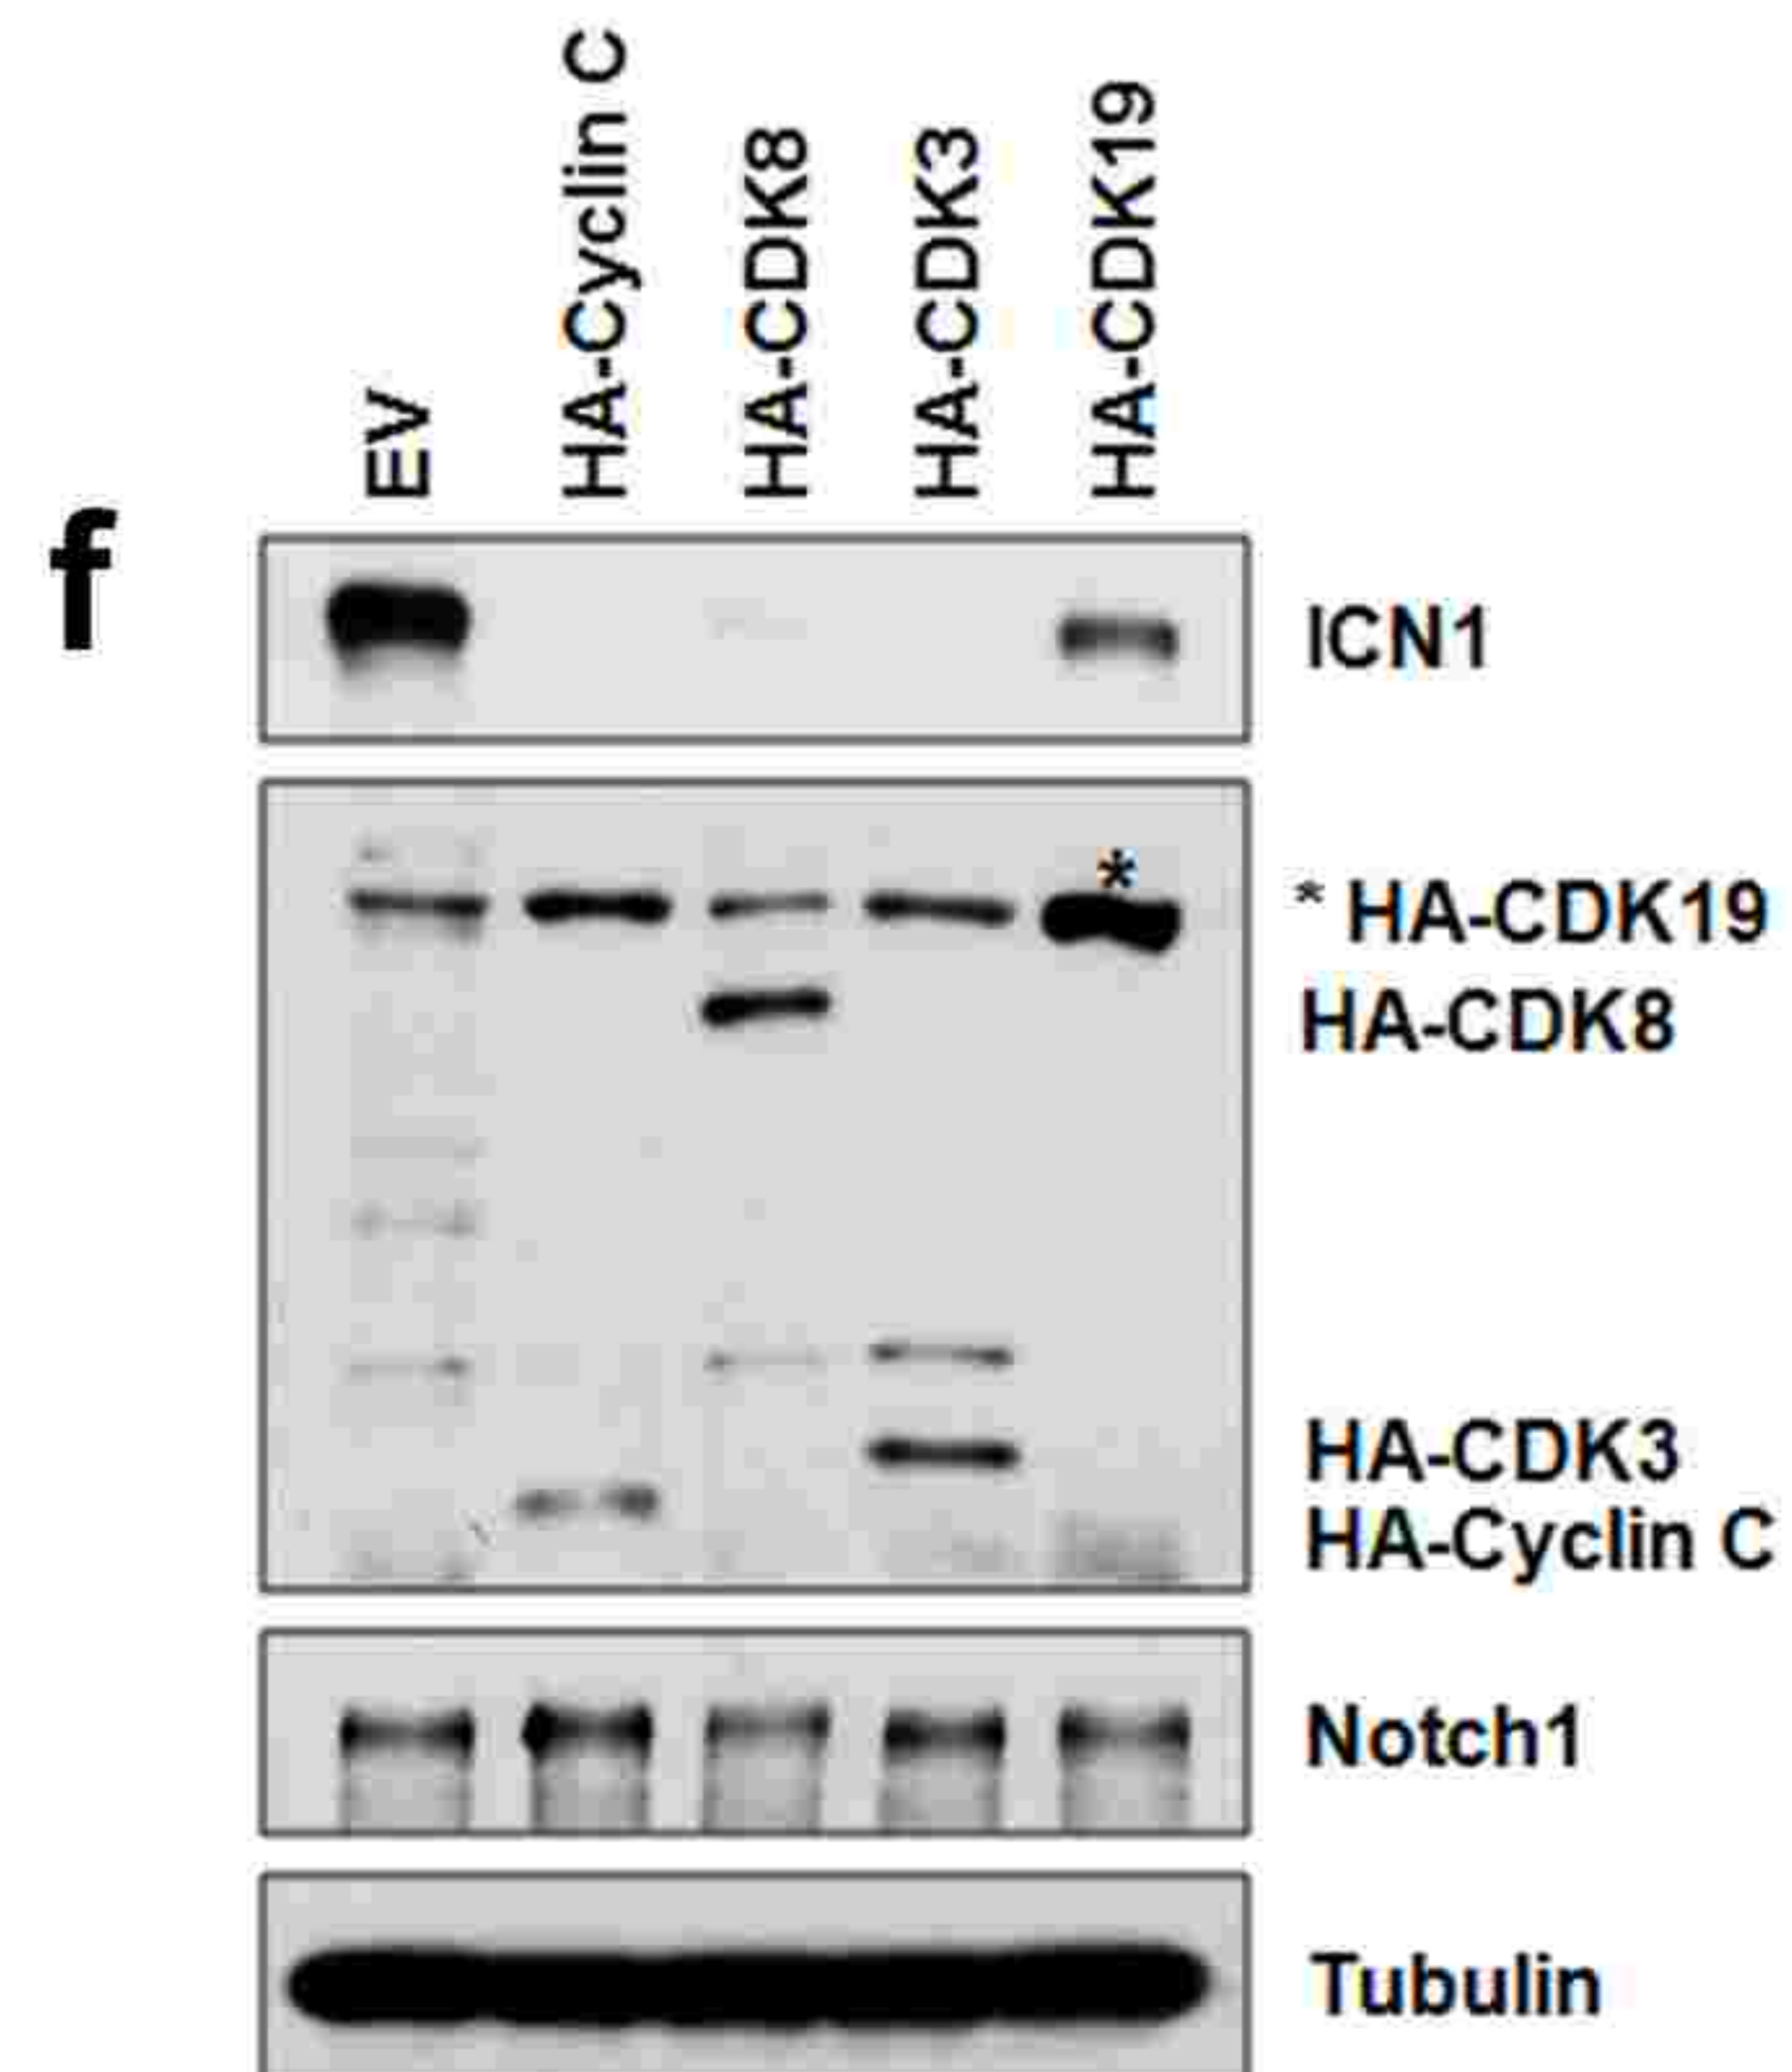

Supplement: NIHMS639903-supplement-Supplementary_Data_Fig_3.pdf [file NIHMS639903-supplement-Supplementary_Data_Fig_3.pdf]

# Supplementary Figure 6

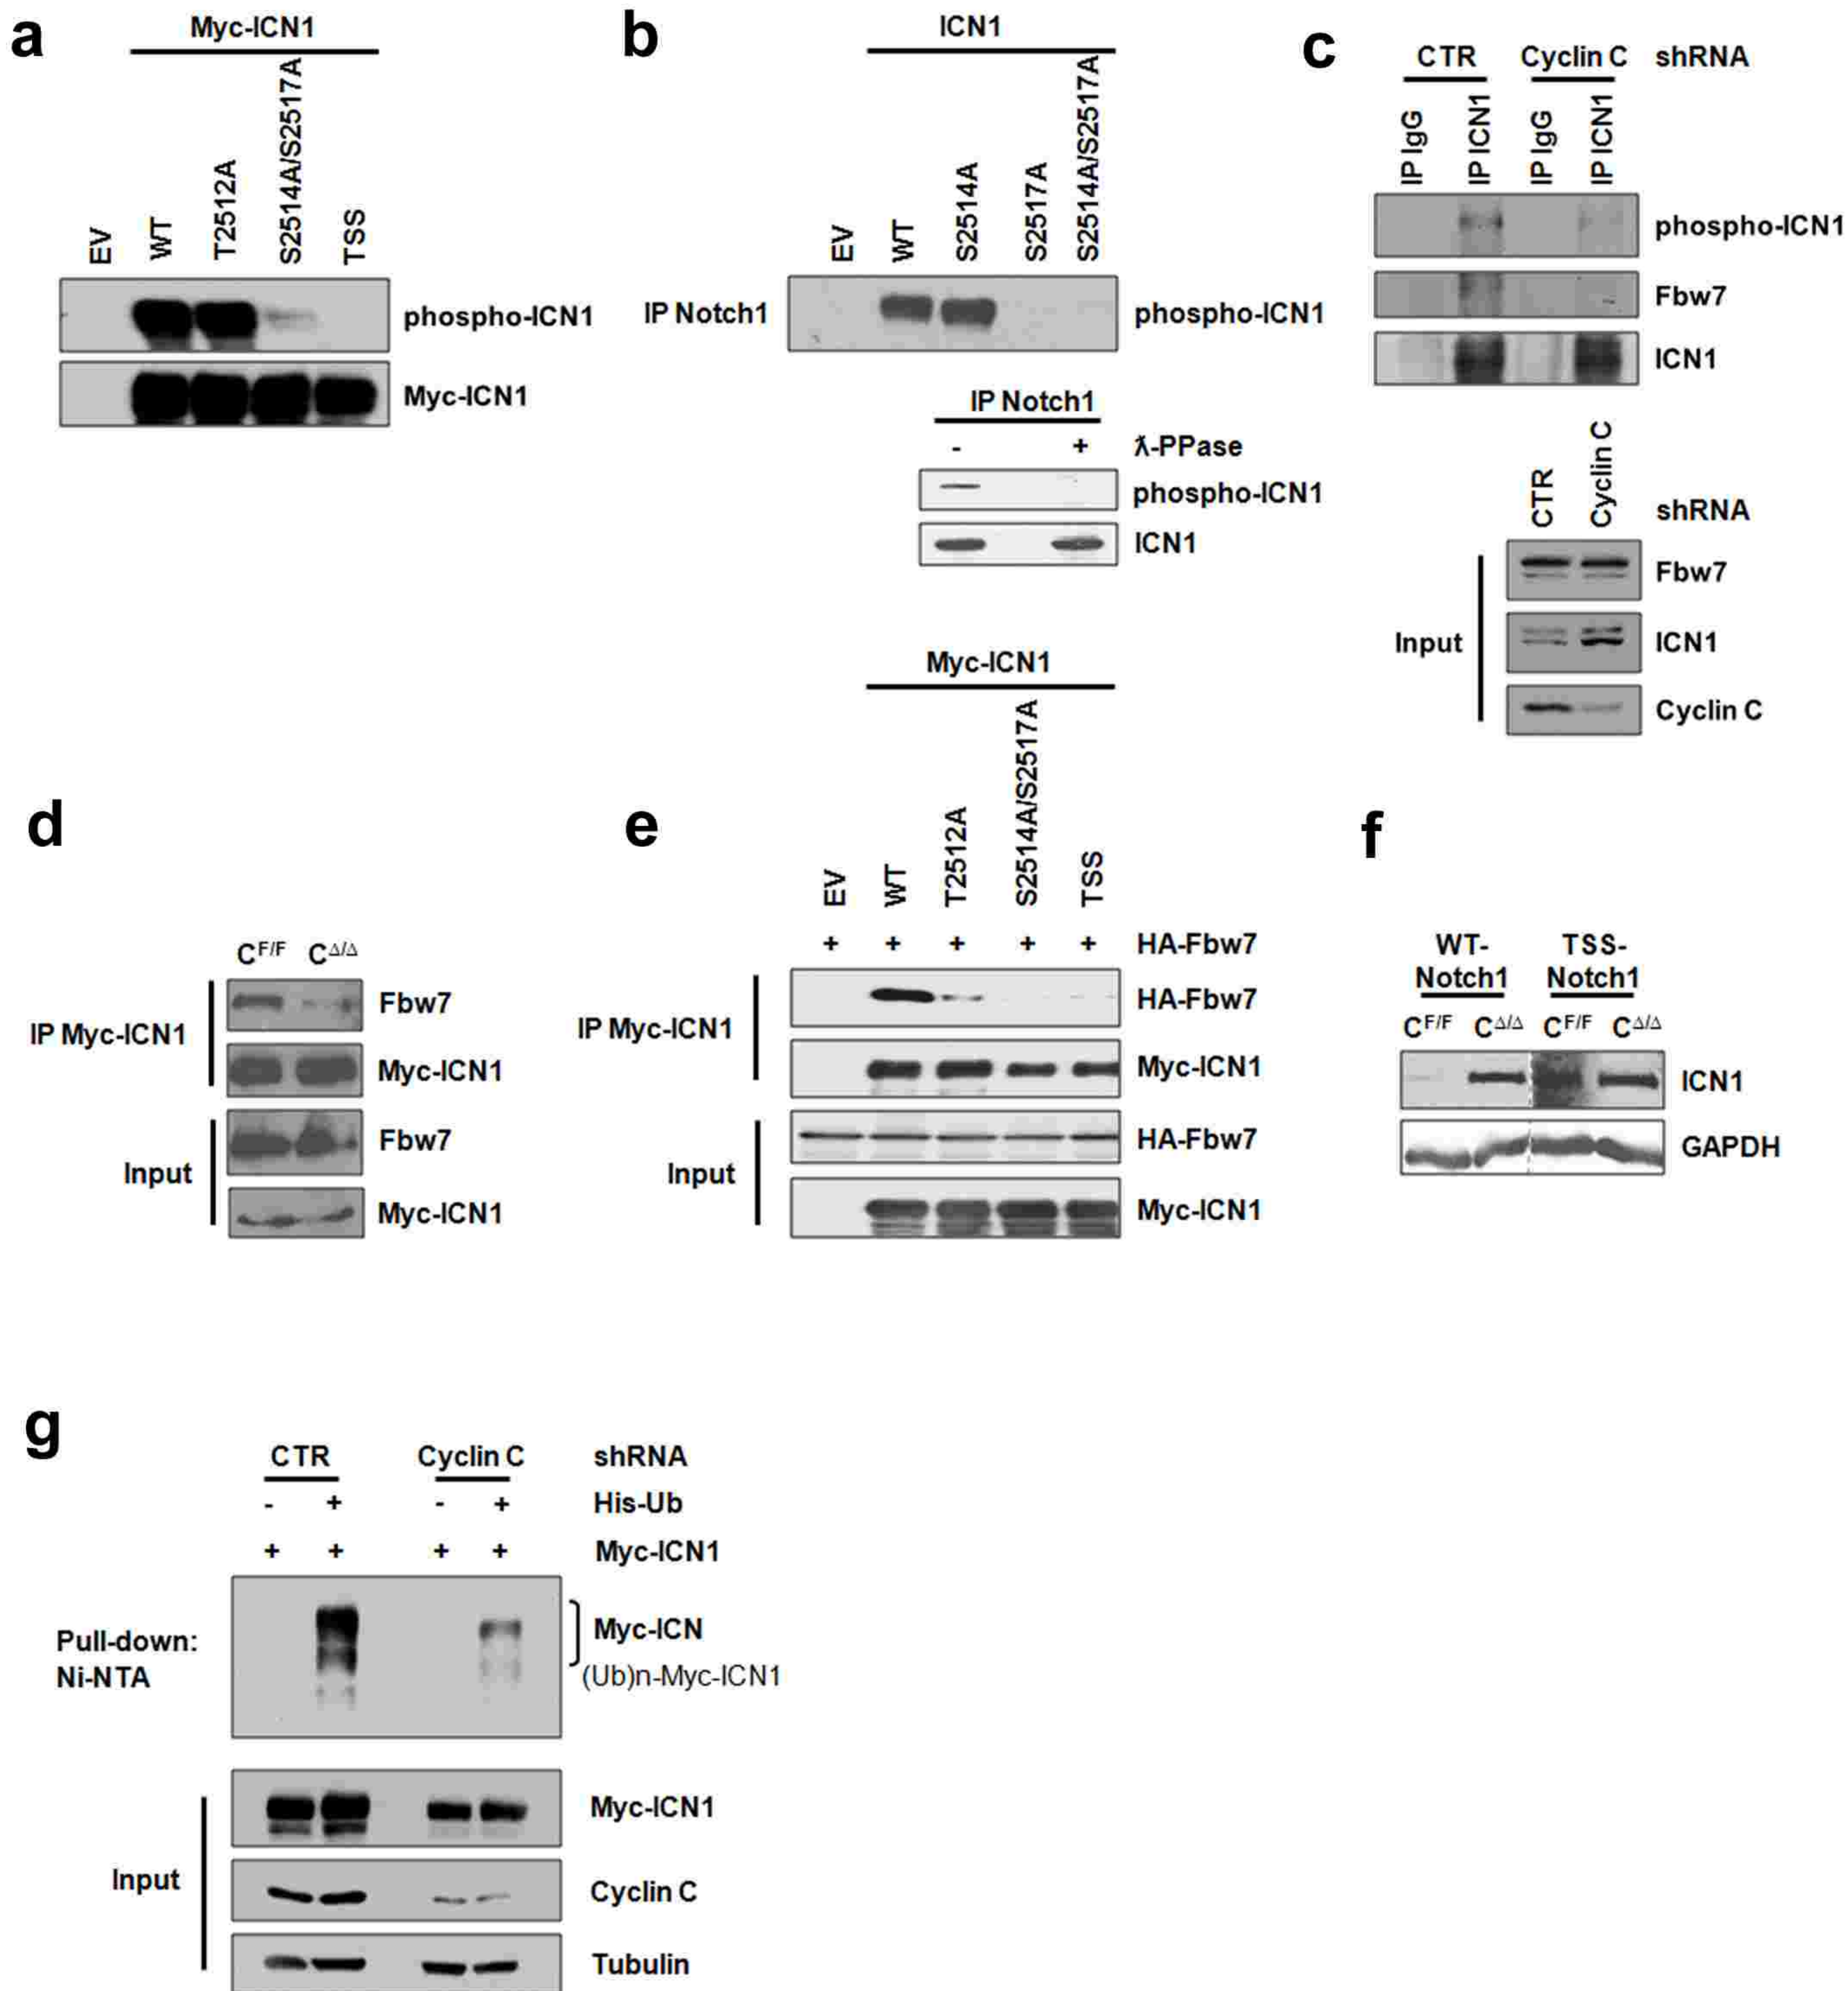

Supplement: NIHMS639903-supplement-Supplementary_Data_Fig_6.pdf [file NIHMS639903-supplement-Supplementary_Data_Fig_6.pdf]

# Supplementary Figure 7

**a**

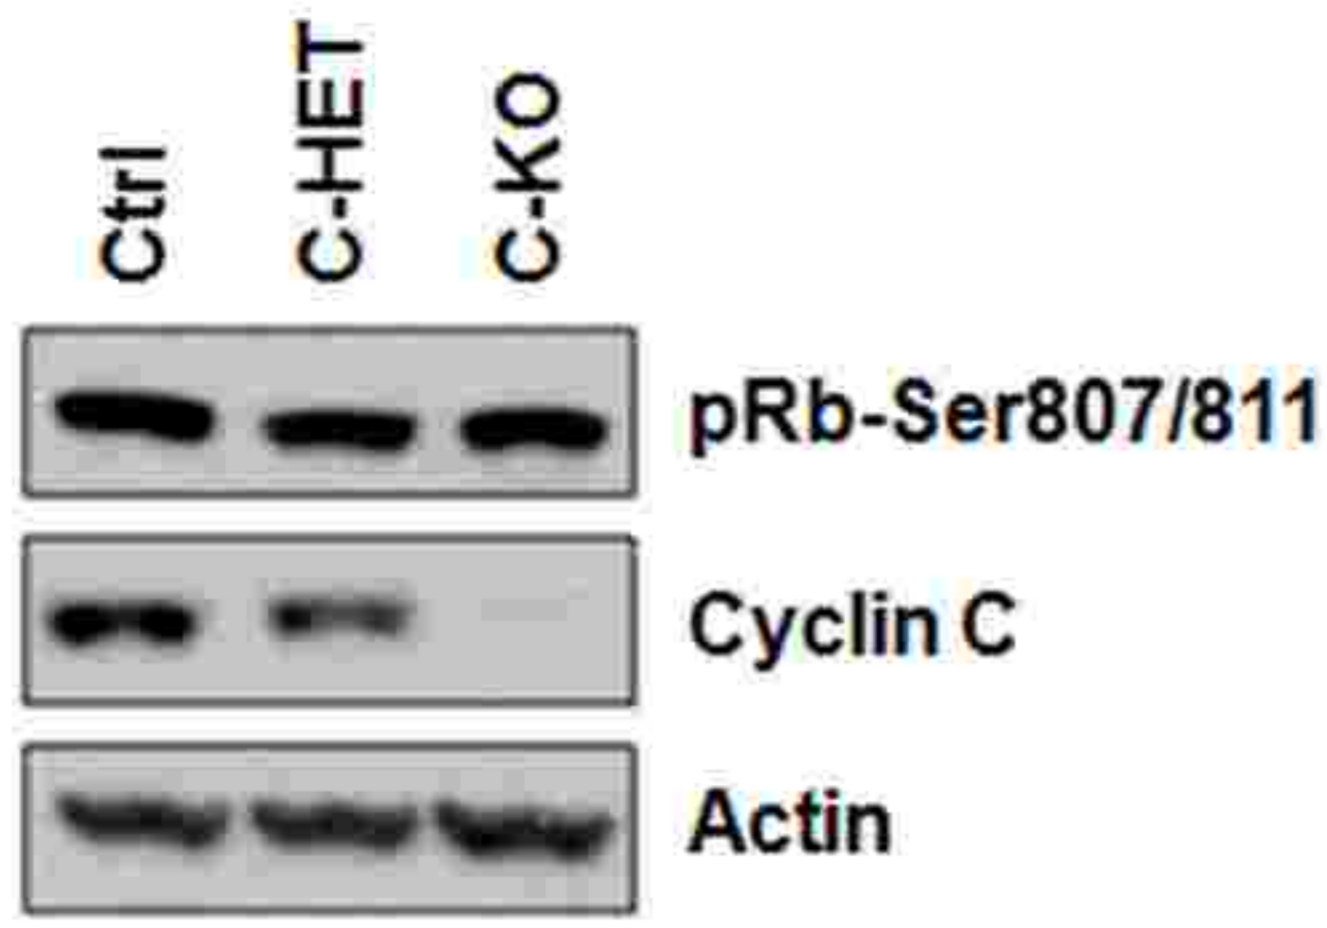

**b**

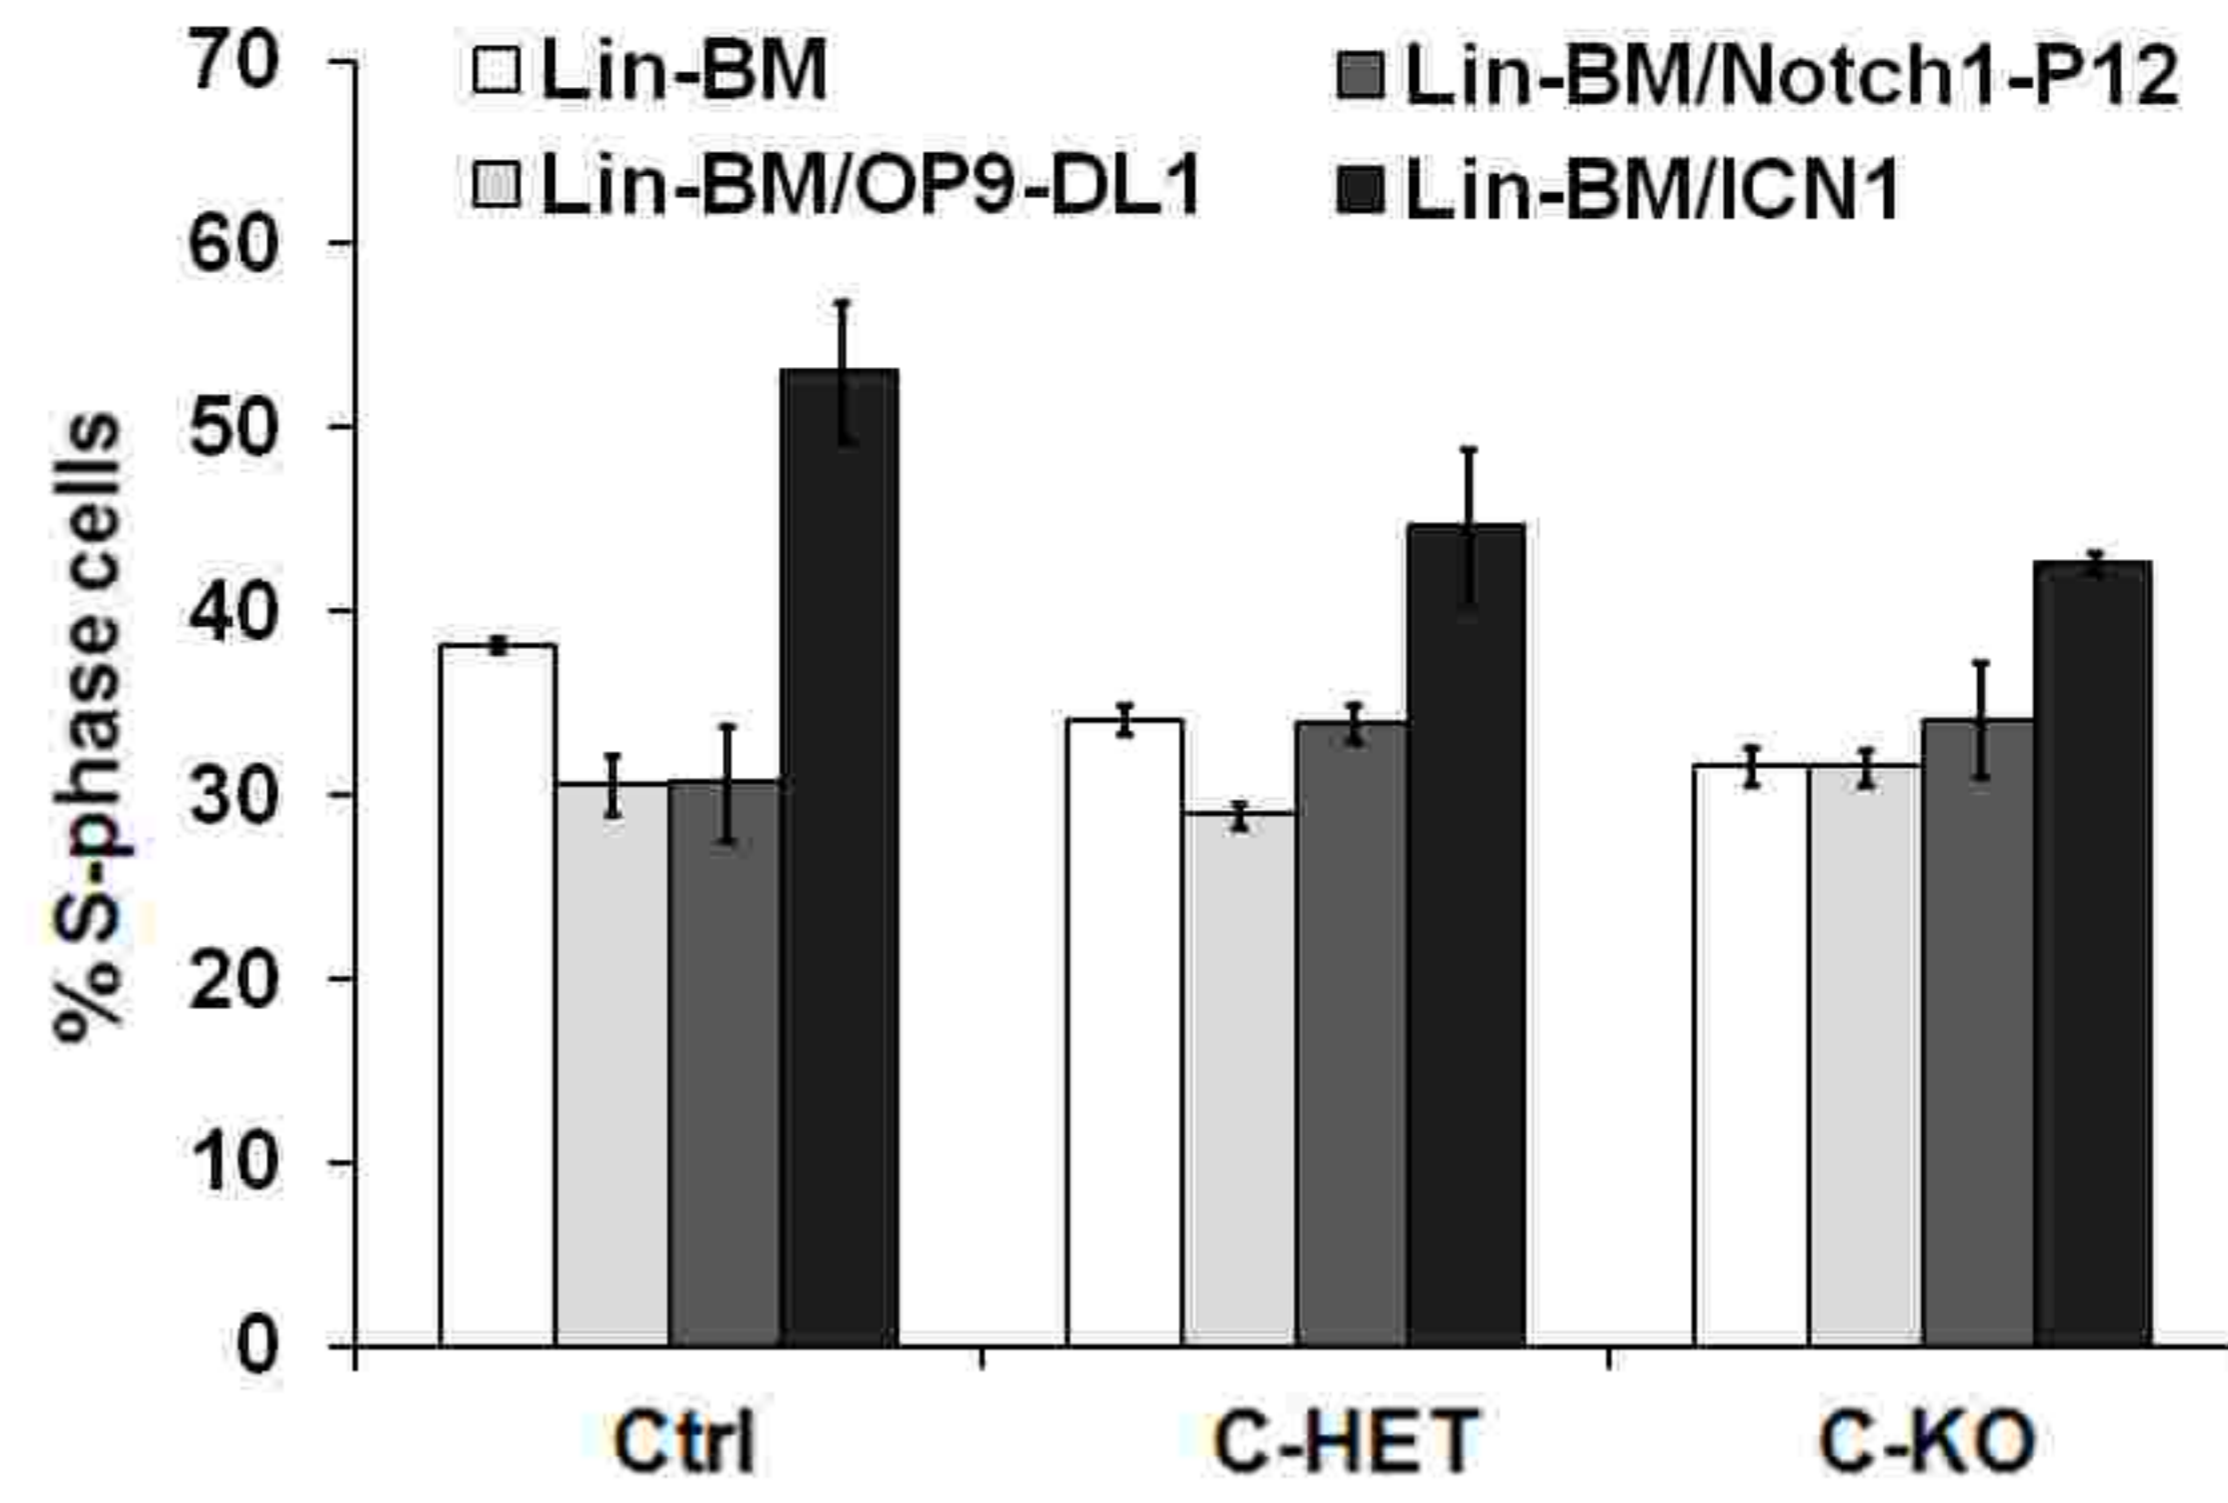

**c**

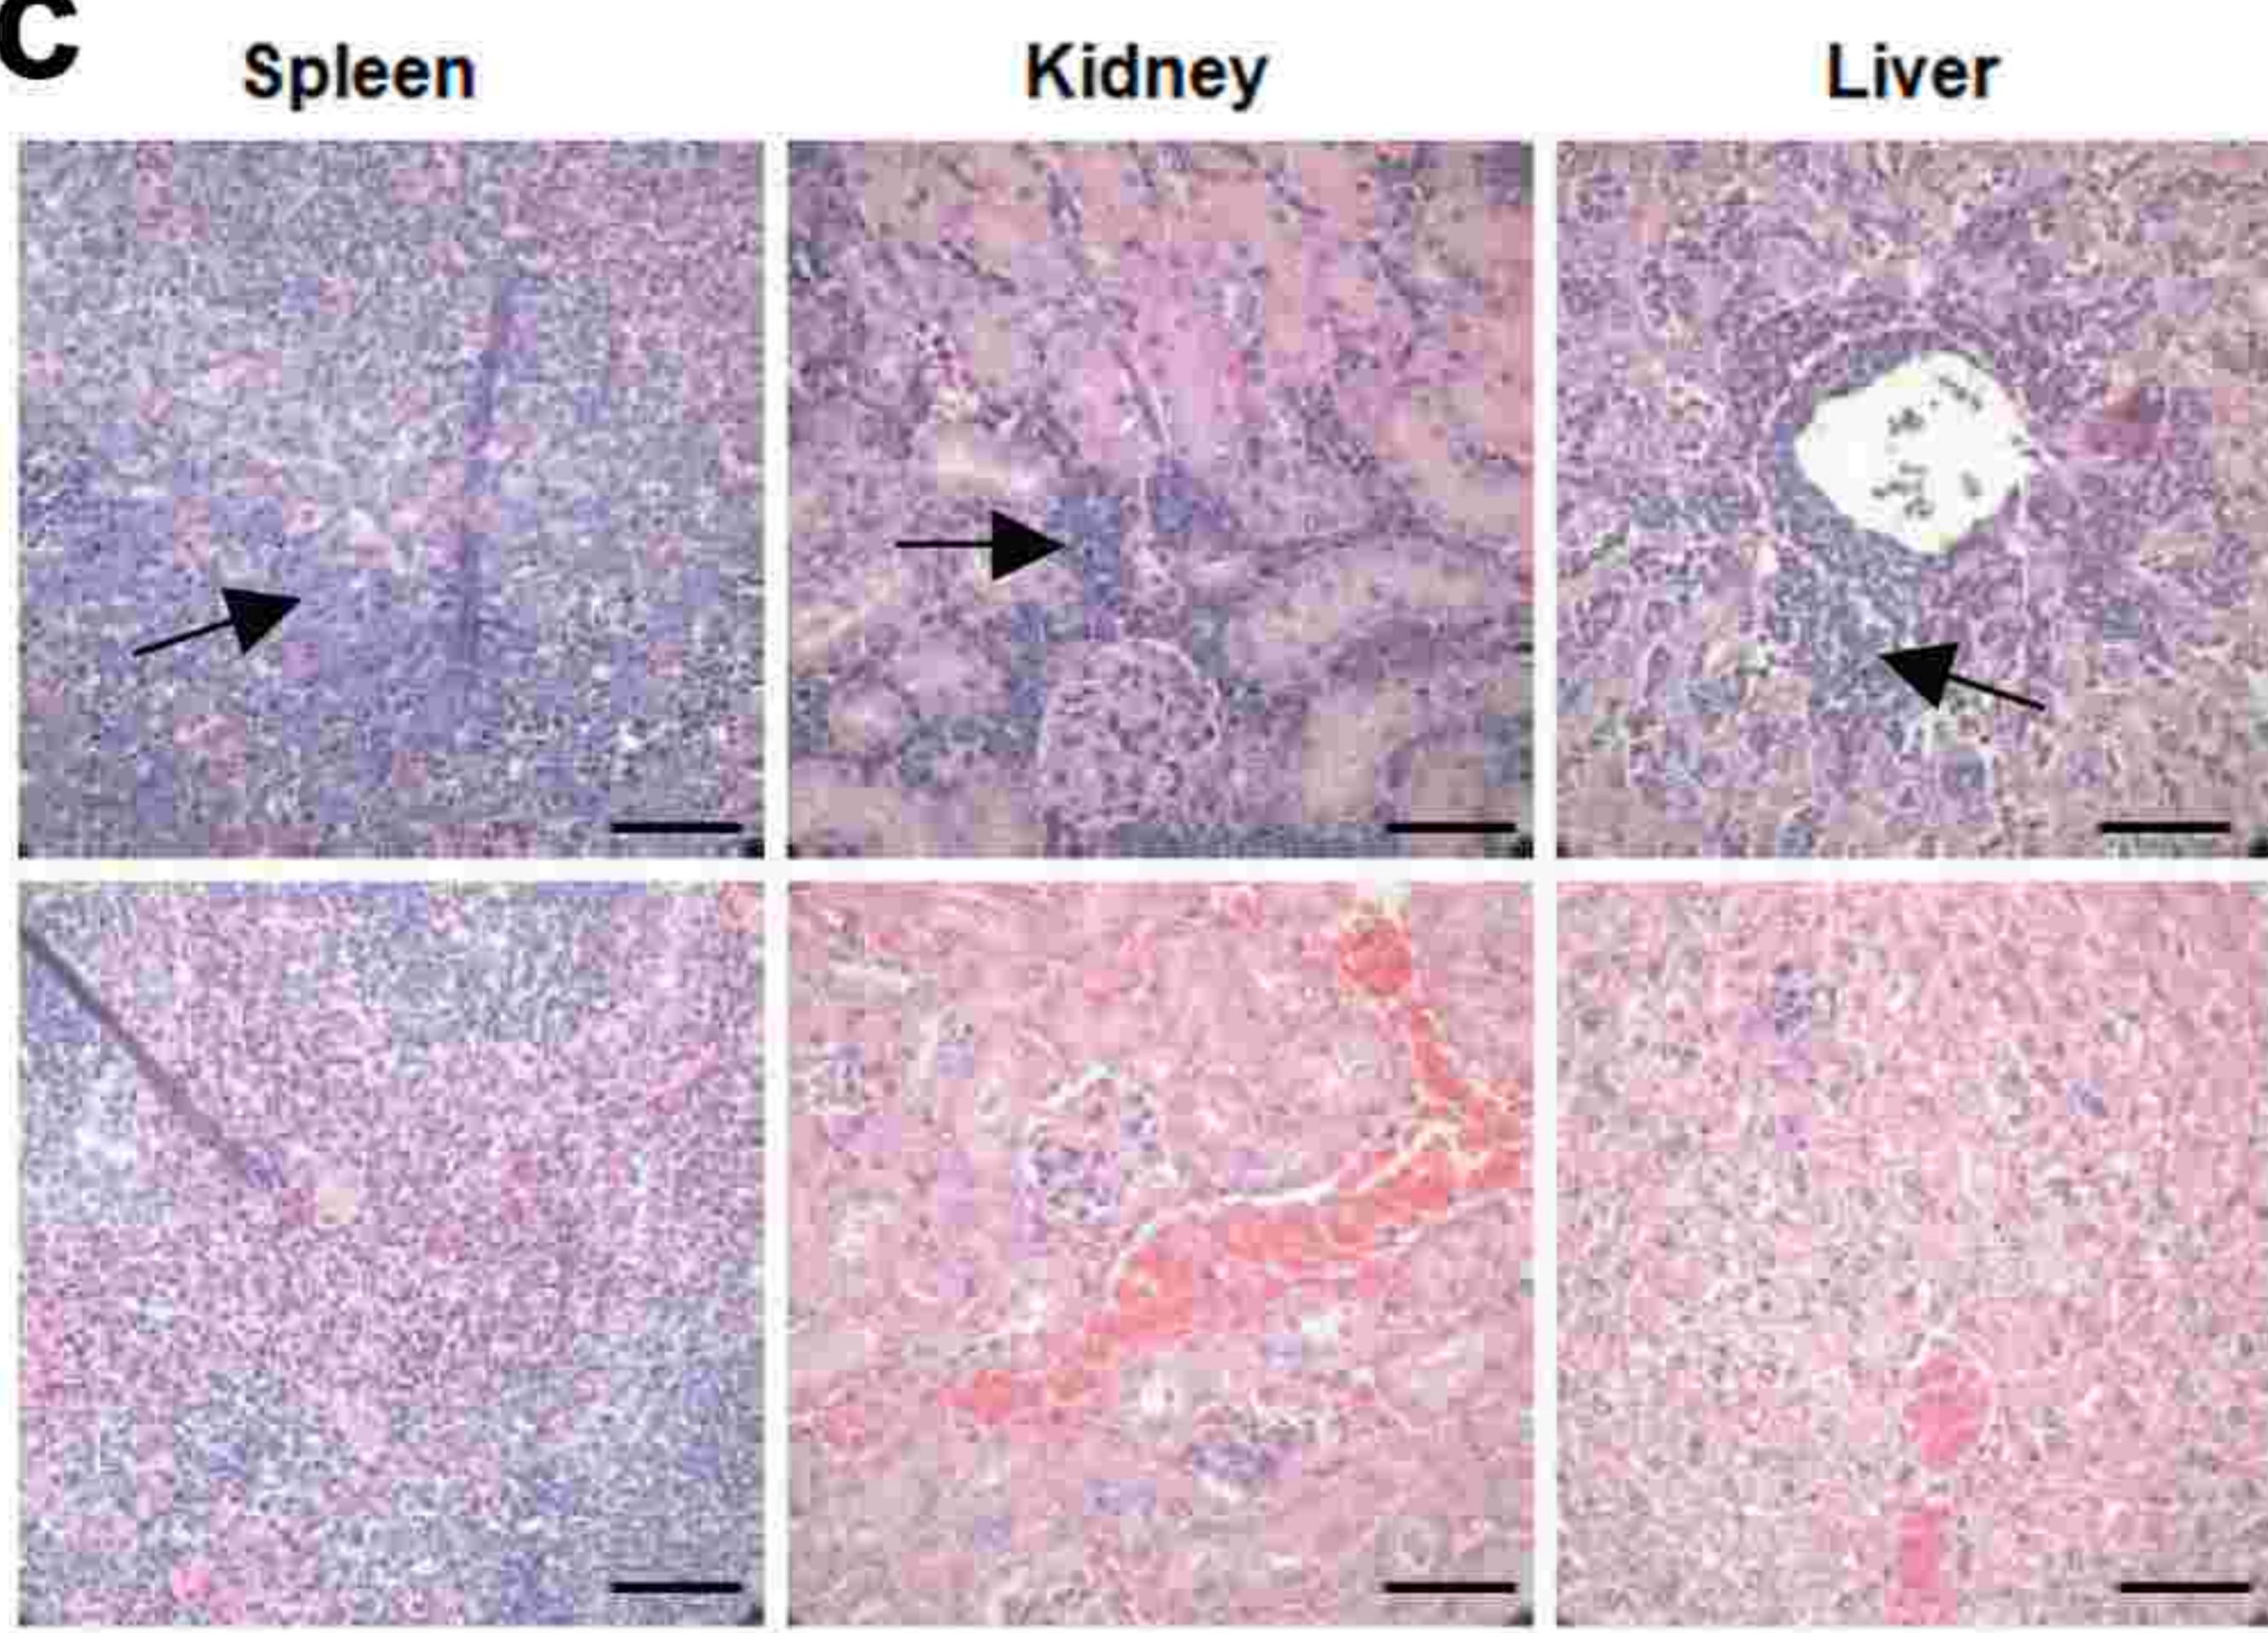

**d**

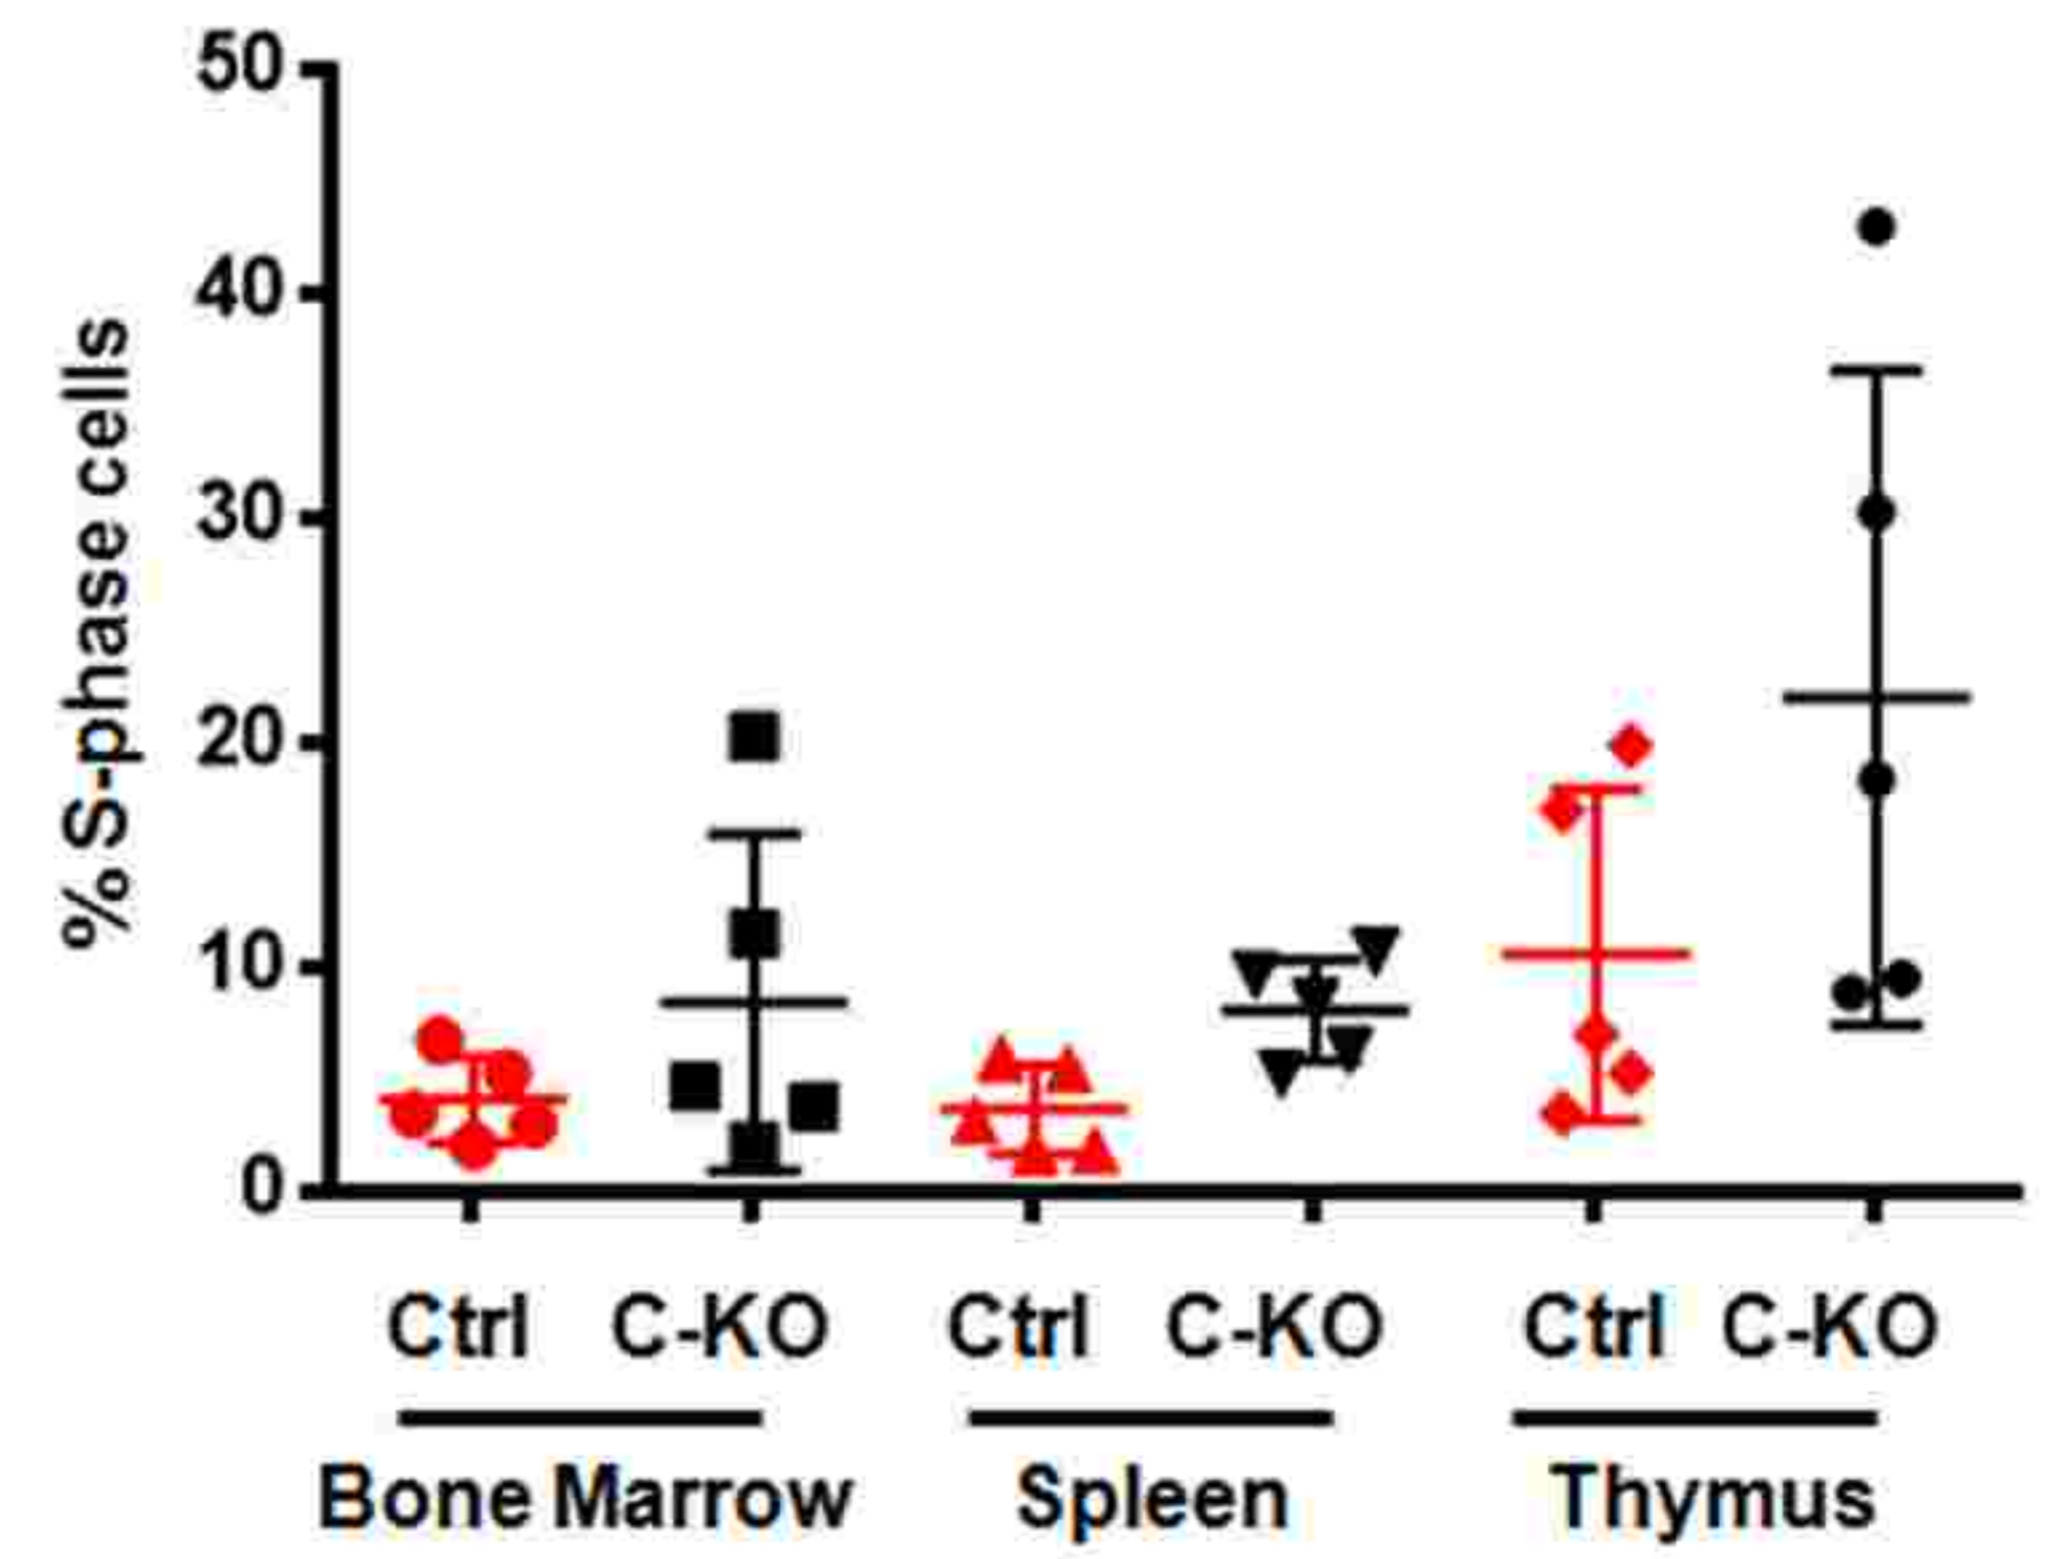

**e**

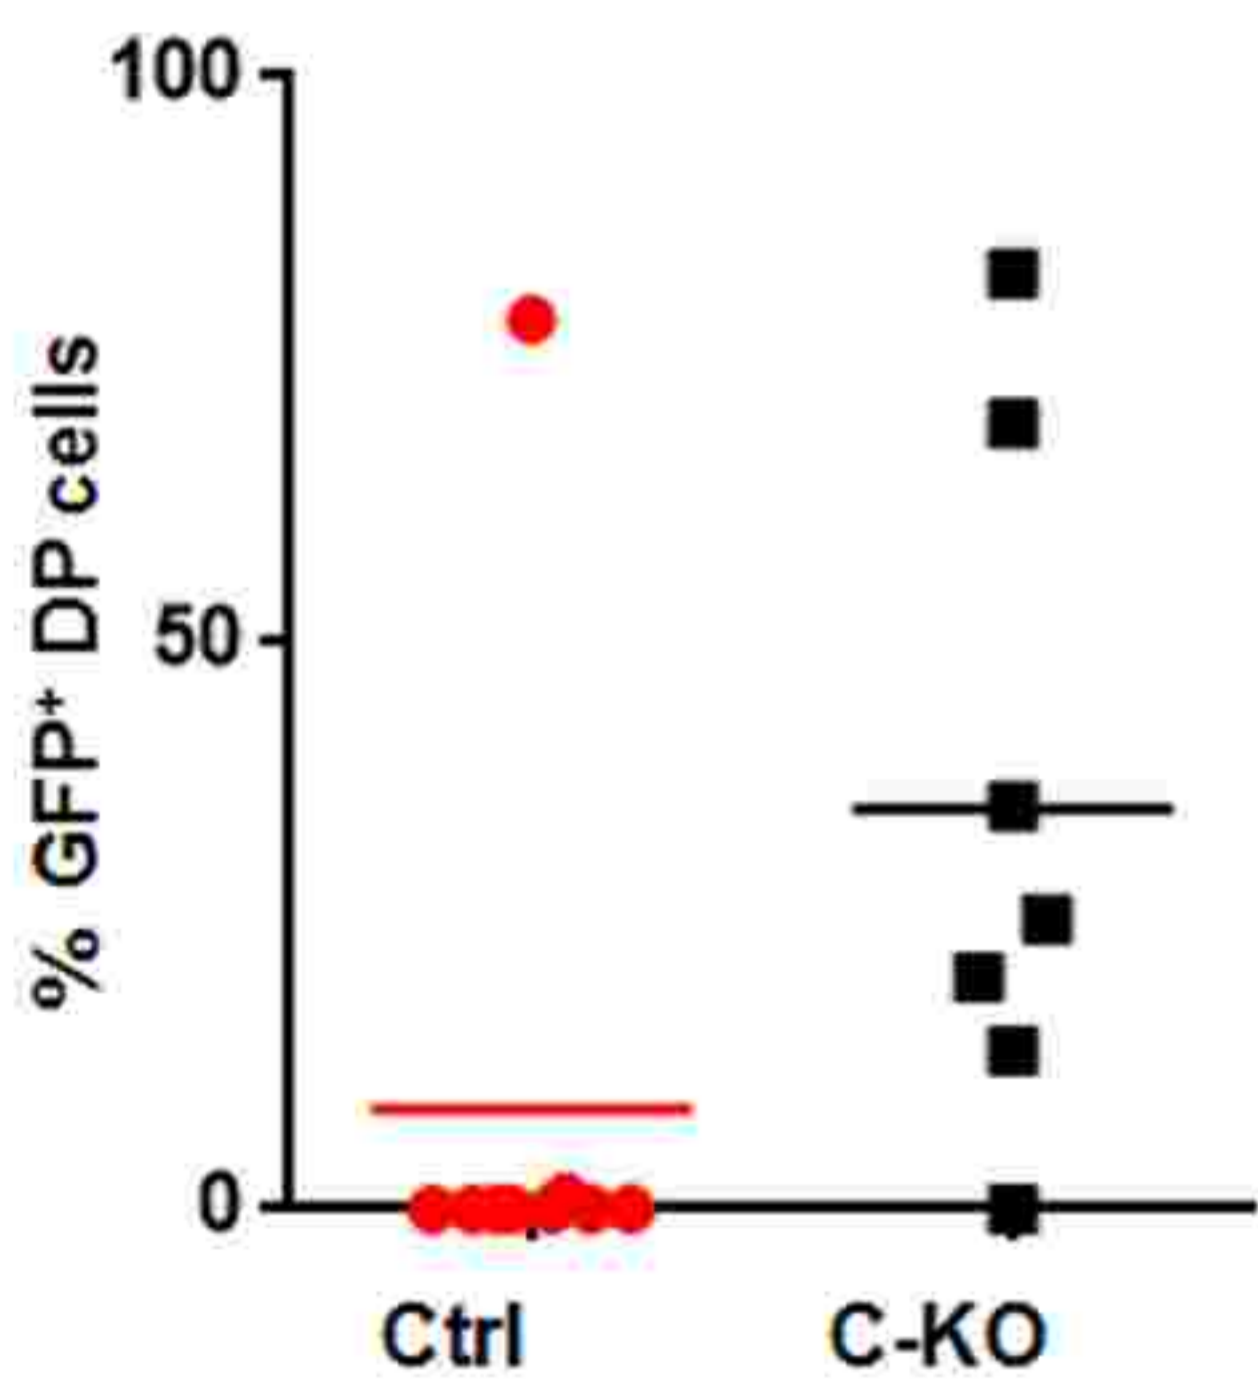

**f**

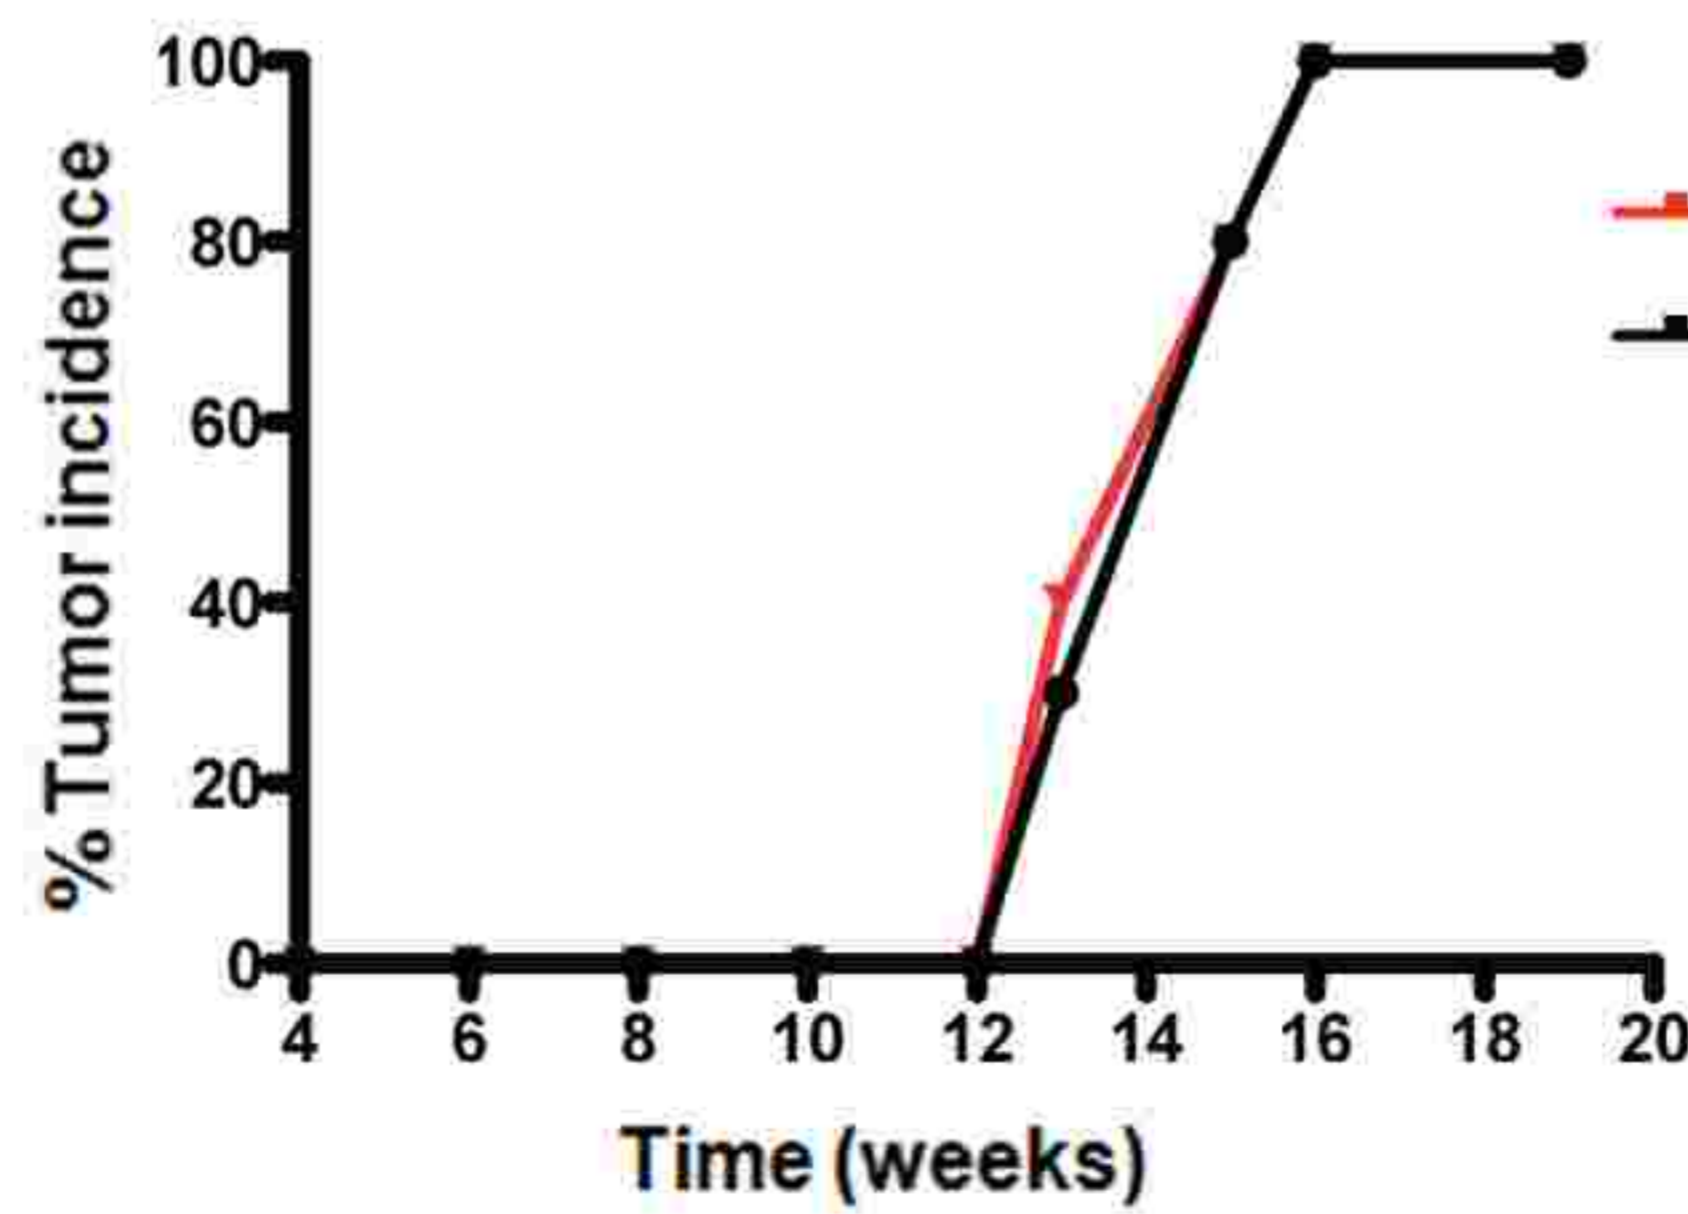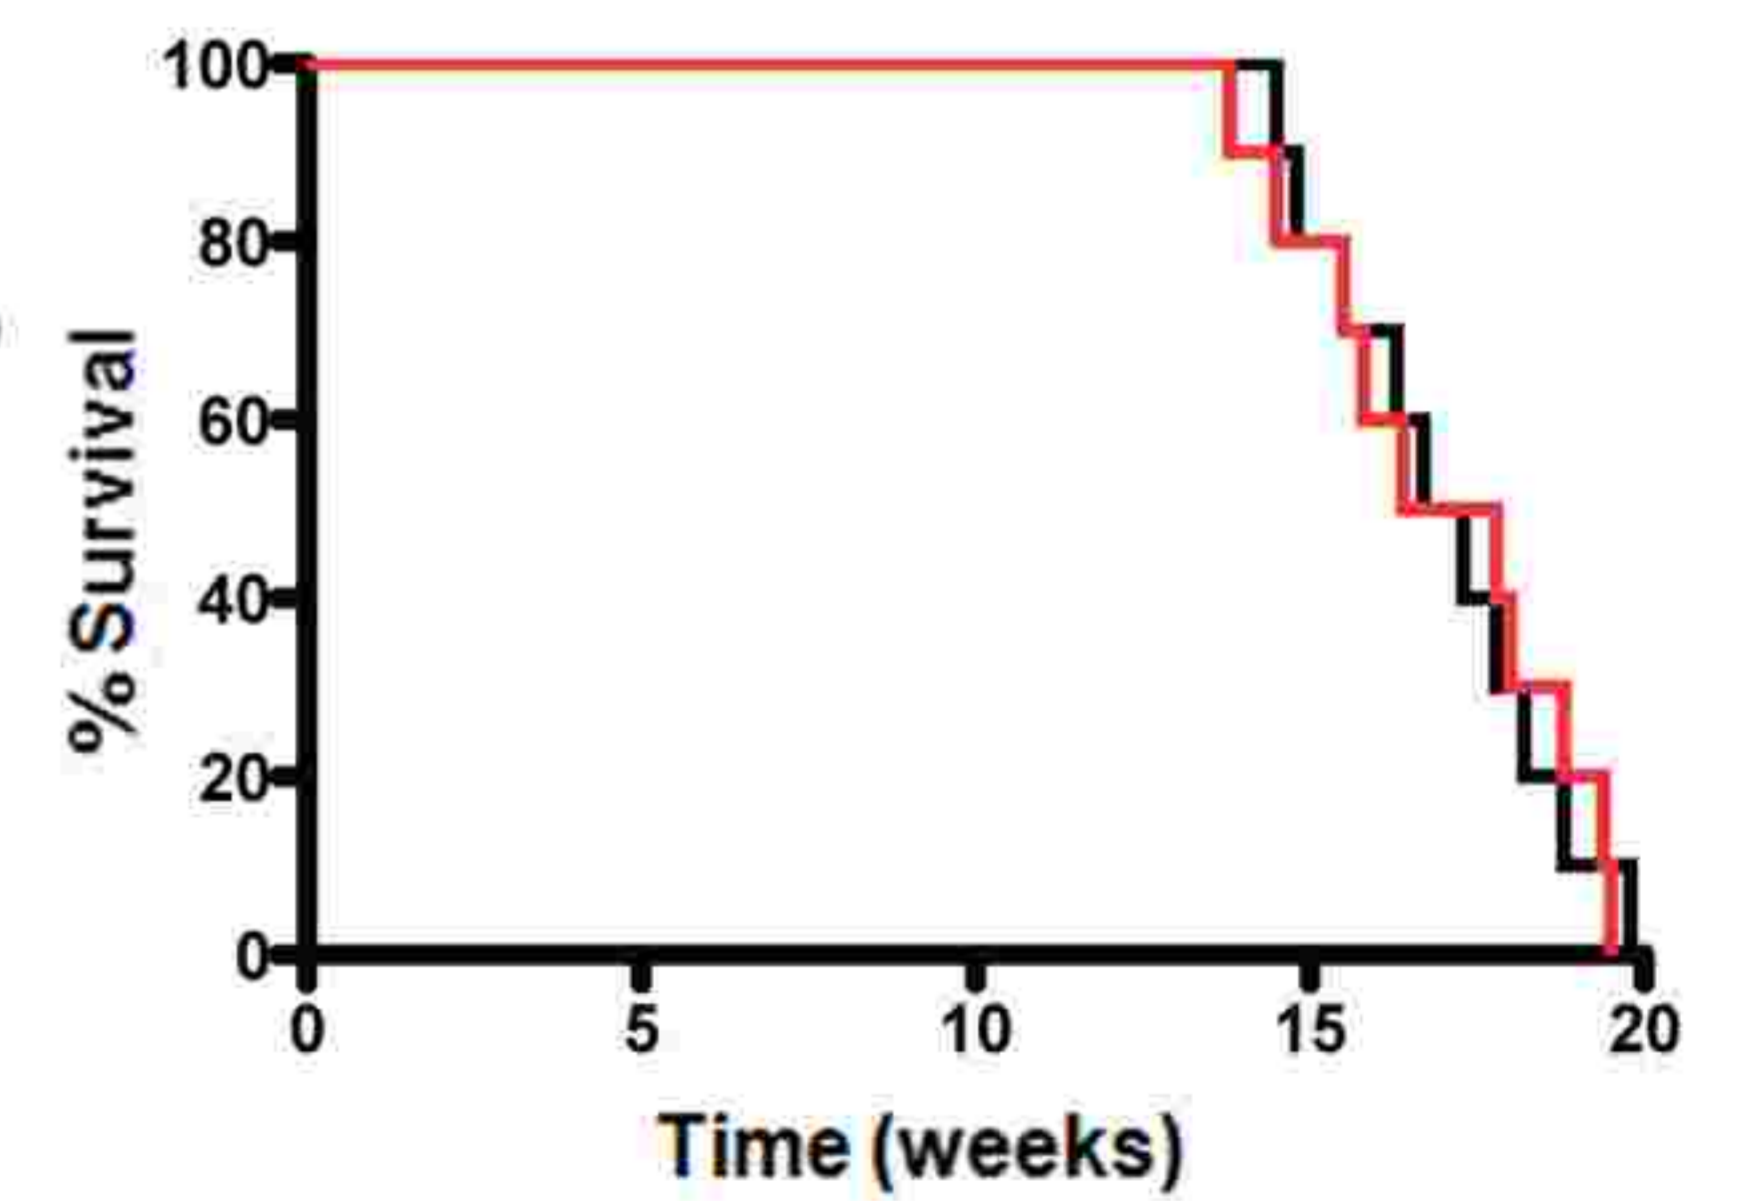

**g**

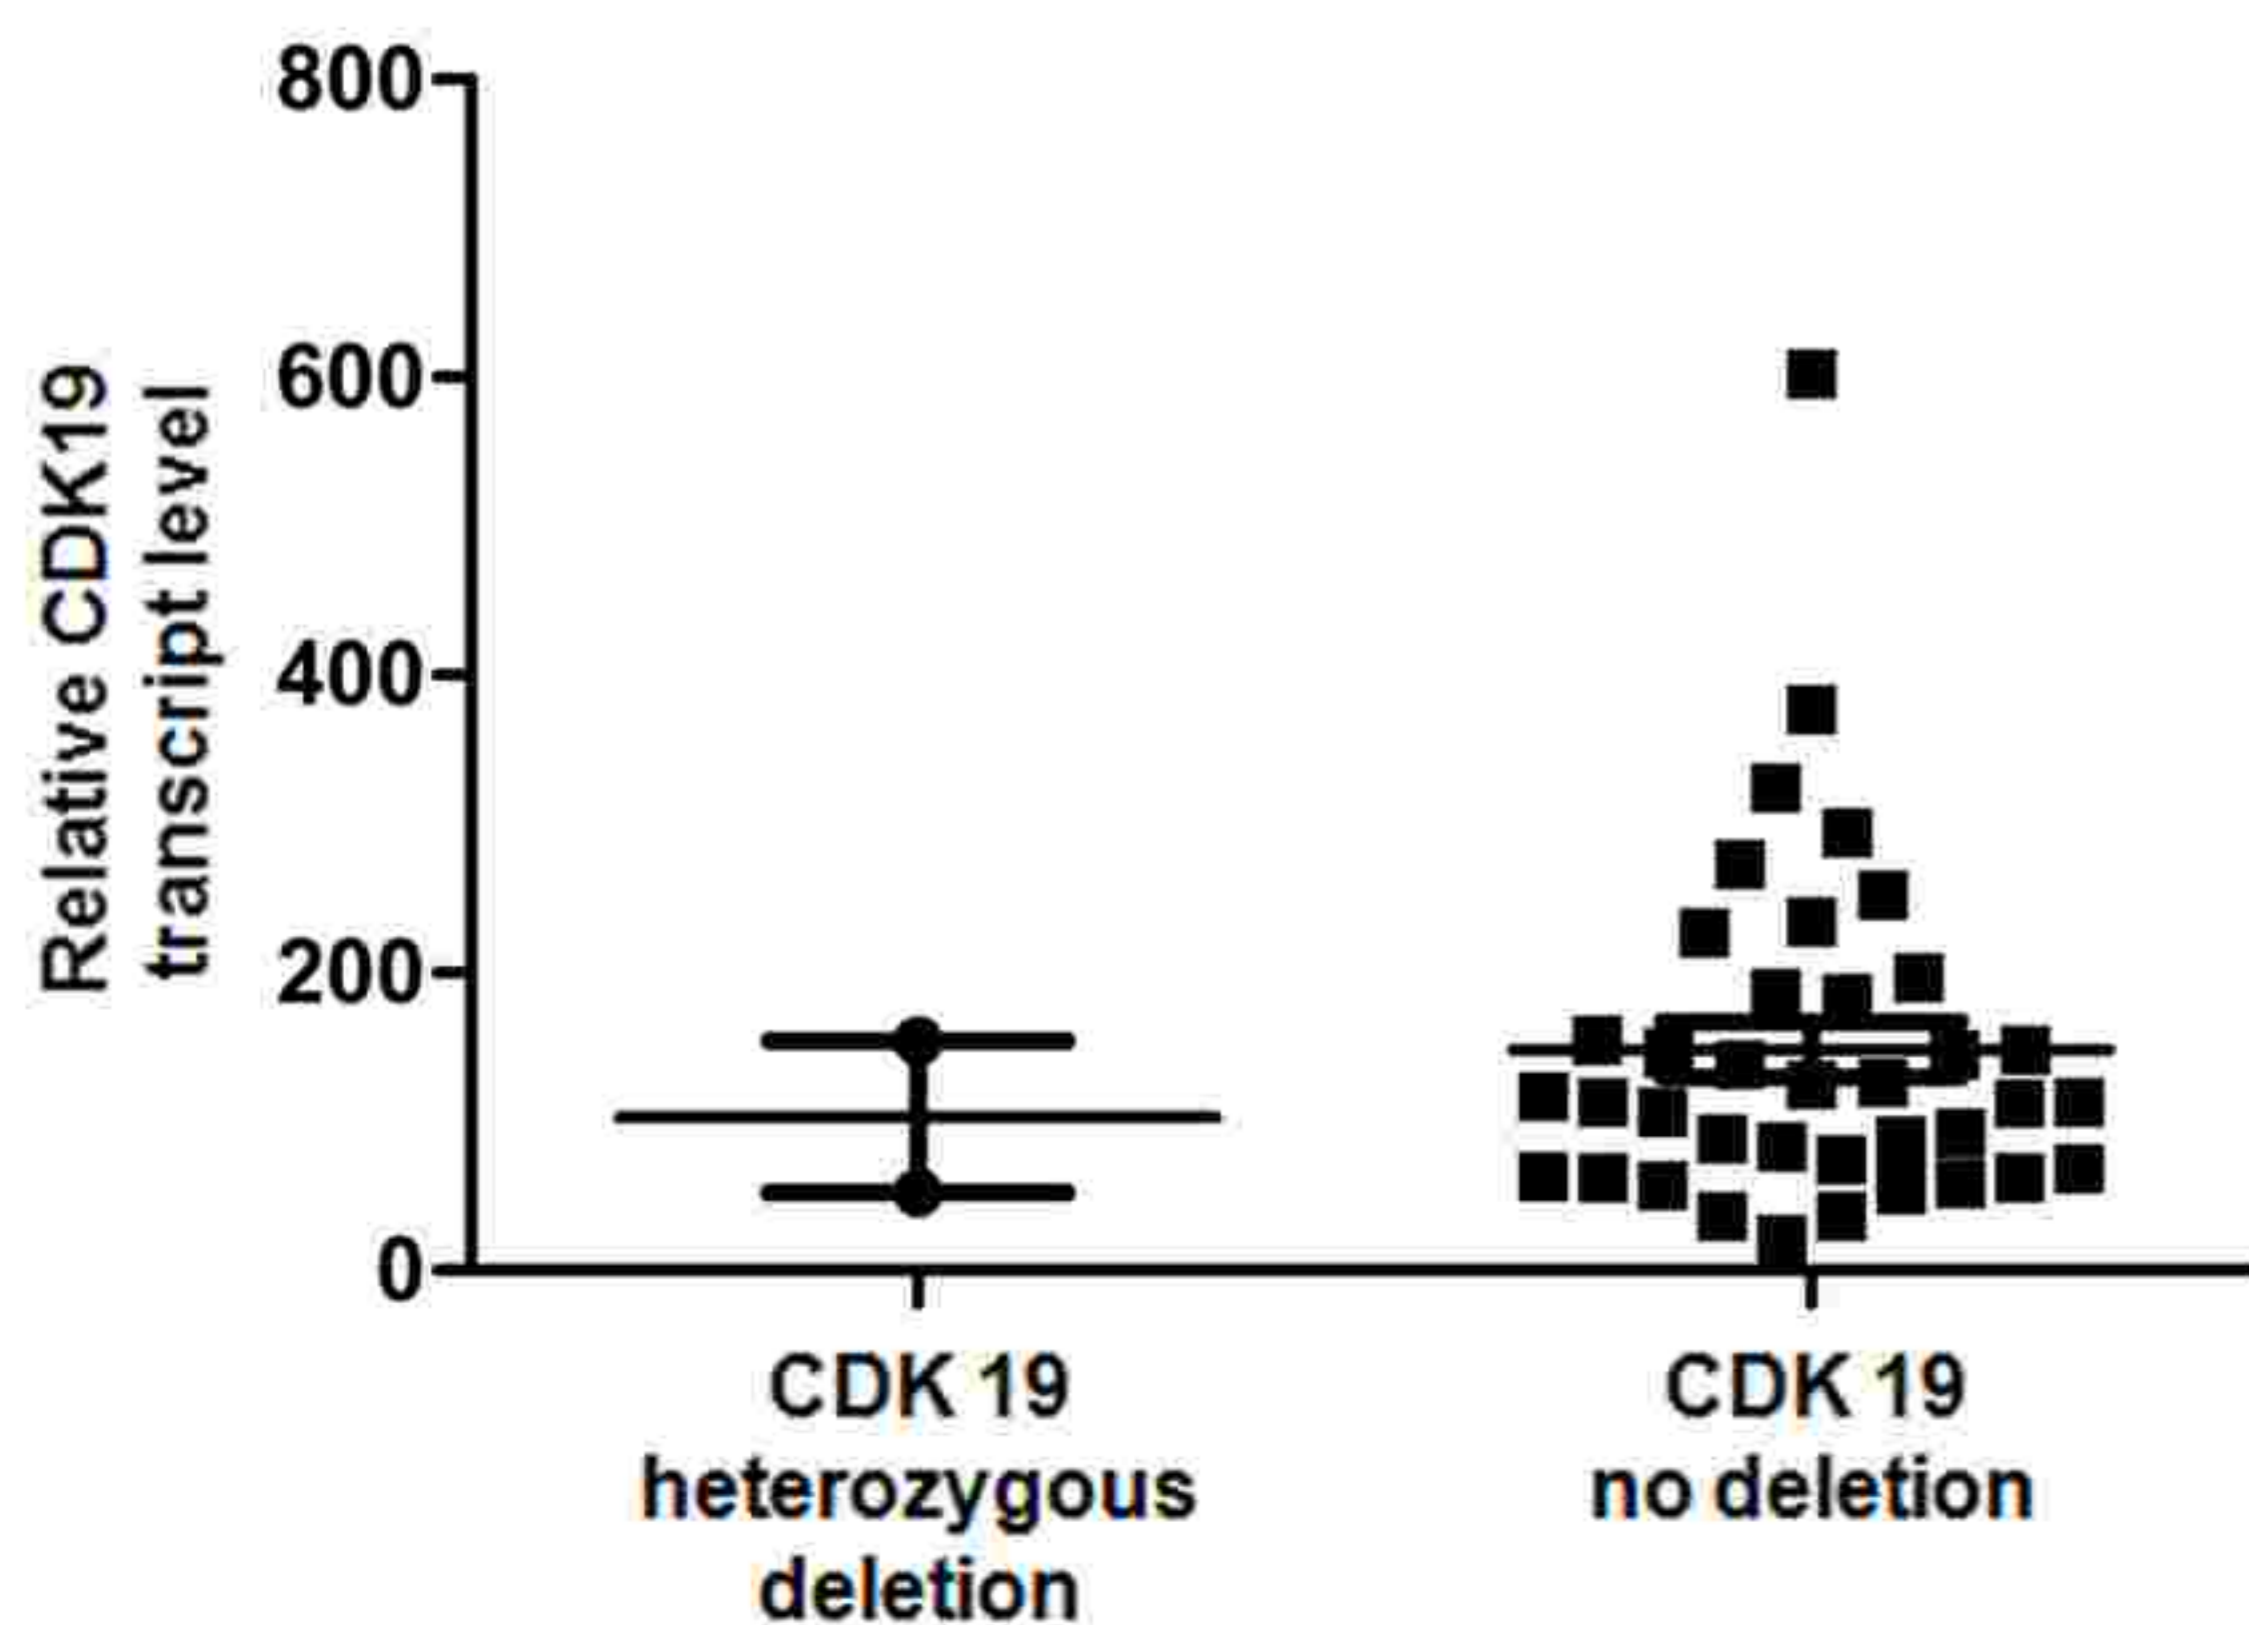

Supplement: NIHMS639903-supplement-Supplementary_Data_Fig_7.pdf [file NIHMS639903-supplement-Supplementary_Data_Fig_7.pdf]
